# Supplementary material for: Functional characteristics and computational model of abundant hyperactive loci in the human genome
Source: eLife. 2024 Nov 13;13:RP95170. doi: 10.7554/eLife.95170 (PMC11560132; doi:10.7554/eLife.95170)
Supplement: Supplementary file 1. — Columns are explained in each sheet. S1: List of ENCODE ChIP-seq datasets used in the study. S2: Coordinates of high-occupancy target (HOT) loci defined in three cell lines. S3: List of DNA-associated proteins (DAPs) clustered into four groups and their PPI enrichment summary statistics. S4: List of ultraconserved regions overlapping with HOT loci. S5: Comparison of HOT loci defined using ENCODE vs. Roadmap Epigenome Project datasets. S6: List of ChIP-seq datasets of RNA-binding protein used in the study. S7: List of eCLIP datasets of RNA-binding proteins used in the study. [file elife-95170-supp1.xlsx]

## Sheet: Table S1. Datasets
Columns:
TF	name of the TF
ENCODE ID	Accession ID of the dataset in ENCODE Project
CELL LINE	Cell line of the dataset
PEAKS	Total number of peaks in the ChIP-seq dataset
ALL HOTS	% of HOT loci the TF is present
HOT ENH	% of HOT enhancers that the TF is present
HOT PROM	% of HOT promoters that the TF is present
PEAKS HOT	% of ChIP-seq peaks in HOT loci
PEAKS HOT ENH	% of ChIP-seq peaks in HOT enhancers
PEAKS HOT PROM	% of ChIP-seq peaks in HOT promoters
TF	ENCODE ID	CELL LINE	PEAKS	ALL HOTS	HOT ENH	HOT PROM	PEAKS HOT	PEAKS HOT ENH	PEAKS HOT PROM
SIX1	ENCFF885NXZ	HepG2	10013	19.41	27.2	12.11	70.76	47.84	22.92
NR5A1	ENCFF304HWM	HepG2	23539	31.77	45.05	19.31	49.25	33.61	15.64
ZBTB33	ENCFF982XKW	HepG2	27829	25.16	29.79	20.82	32.93	18.76	14.17
MAX	ENCFF707KEM	HepG2	70176	79.9	82.86	77.12	47.2	23.01	24.18
POLR2A	ENCFF663LEV	HepG2	28479	42.61	27	57.25	58.03	17.6	40.43
RCOR1	ENCFF110WHS	HepG2	4271	10.05	8.92	11.11	84.83	36.03	48.79
MAFG	ENCFF311PMU	HepG2	3353	3.84	3.71	3.96	41.84	19.59	22.25
BHLHE40	ENCFF268DXL	HepG2	17454	28.56	28.84	28.31	58.08	28.26	29.82
ZNF569	ENCFF070OZC	HepG2	2350	4.74	2.69	6.66	78.81	21.49	57.32
BCLAF1	ENCFF491DYX	HepG2	36	0	0	0	0	0	0
ZNF25	ENCFF543VDT	HepG2	5886	12.21	7.83	16.32	79.34	24.28	55.06
ZNF17	ENCFF855DRG	HepG2	1969	3.41	2.18	4.56	66.23	20.42	45.81
ZMAT5	ENCFF079GRV	HepG2	487	0.9	0.65	1.12	70.02	25.46	44.56
ZBTB39	ENCFF036DSO	HepG2	8001	14.84	14.79	14.89	71.47	34.3	37.17
KLF13	ENCFF171DFD	HepG2	4848	9.27	5.15	13.14	71.33	18.85	52.48
GLI4	ENCFF707KQF	HepG2	6410	12.92	7.35	18.14	78.28	21.15	57.13
TRAFD1	ENCFF967GSO	HepG2	4258	7.8	6.5	9.02	69.96	27.78	42.18
TIGD6	ENCFF020JNK	HepG2	12993	24.41	15.45	32.81	72.92	21.98	50.94
WIZ	ENCFF720IGS	HepG2	8106	15.31	12.39	18.04	73.54	28.45	45.09
ZNF616	ENCFF816JWX	HepG2	8158	16.87	9.74	23.56	78.45	21.68	56.77
SNAPC4	ENCFF003YHG	HepG2	11585	20.63	15.44	25.49	70.3	25.14	45.15
ZNF707	ENCFF306CIS	HepG2	4893	8.11	4.61	11.39	65.48	17.6	47.88
CREB1	ENCFF852AAQ	HepG2	35734	24.49	18.31	30.3	24.48	8.76	15.72
ZNF451	ENCFF655ABJ	HepG2	12798	25.38	17.33	32.93	76.93	25.07	51.87
MAZ	ENCFF535NYU	HepG2	26597	45.94	35.68	55.55	68.81	25.37	43.44
ZNF33A	ENCFF408VEZ	HepG2	3413	6.08	3.99	8.05	69.24	22.06	47.17
ZNF784	ENCFF537LZR	HepG2	12596	24.09	18.75	29.09	74.45	27.75	46.71
HIVEP1	ENCFF215ESU	HepG2	17473	31.02	23.41	38.15	69.36	25.33	44.03
ZNF432	ENCFF046FVA	HepG2	1119	1.72	0.98	2.41	58.18	15.64	42.54
ZNF598	ENCFF921QZP	HepG2	8570	17.06	11.69	22.1	78.05	25.52	52.53
ZNF786	ENCFF458FBS	HepG2	10243	18.41	14.53	22.05	69.29	26.28	43
ZNF280D	ENCFF979JSC	HepG2	18813	30.57	31.76	29.46	62.86	31.53	31.33
ZNF44	ENCFF512PIO	HepG2	8482	16.09	12.22	19.72	72.46	26.47	45.99
EEA1	ENCFF996HVG	HepG2	6553	12.7	6.14	18.86	73.69	17.35	56.34
ZNF547	ENCFF907JYN	HepG2	14850	28.57	18.6	37.91	76.35	23.81	52.54
ZNF12	ENCFF842COU	HepG2	15222	24.6	27.88	21.53	58.93	31.99	26.95
SOX18	ENCFF139MAW	HepG2	6722	12.95	10.44	15.31	73.98	28.76	45.22
CEBPD	ENCFF784EXR	HepG2	18032	26.19	32.51	20.25	52.1	31.13	20.97
ZNF483	ENCFF727IPR	HepG2	13880	27.4	23.55	31	78.16	32.46	45.7
PREB	ENCFF624VRP	HepG2	2263	4.78	2.22	7.18	77.24	17.32	59.92
ZNF331	ENCFF333ZPM	HepG2	29915	54.27	61.32	47.66	66.43	35.92	30.52
HNF4G	ENCFF107CTN	HepG2	12251	25.45	29.13	21.99	78.65	43.19	35.46
FOSL2	ENCFF200ULH	HepG2	50973	56.66	67.22	46.76	40.48	23.05	17.43
ZNF414	ENCFF933JZI	HepG2	16580	29.93	27.61	32.11	70.59	31.24	39.34
ZFP41	ENCFF833OHI	HepG2	5700	11.47	7.36	15.32	76.16	23.42	52.74
ZNF512B	ENCFF898BBA	HepG2	6743	11.83	12.71	10.99	66.56	34.6	31.96
ZBTB44	ENCFF173WCV	HepG2	4853	11.52	7.59	15.2	87.22	27.61	59.61
TP53	ENCFF701DTE	HepG2	7648	15.85	13.25	18.28	78.02	31.35	46.67
TEAD4	ENCFF392AXI	HepG2	20978	32.84	36.23	29.67	56.19	29.79	26.39
ZNF20	ENCFF950PRR	HepG2	4289	7.39	3.87	10.7	67.38	16.97	50.41
KIAA2018	ENCFF168XTB	HepG2	2966	6.1	3.35	8.68	80.18	21.27	58.9
NR3C1	ENCFF733MQF	HepG2	503	1.12	0.41	1.78	77.93	13.72	64.21
MYNN	ENCFF447QQH	HepG2	4577	10.04	6.59	13.28	83.13	26.46	56.67
FOXA1	ENCFF235PEX	HepG2	33225	41.73	55.55	28.77	44.58	28.6	15.98
TCF12	ENCFF518GBI	HepG2	62	0.02	0.02	0.02	11.29	6.45	4.84
ZNF264	ENCFF027ANT	HepG2	17912	33.85	37.5	30.43	71.14	37.63	33.51
HDAC2	ENCFF912MTN	HepG2	34297	60.45	71.52	50.07	66.22	37.58	28.64
ZNF33B	ENCFF643NJV	HepG2	7722	15.73	10.35	20.76	78.94	24.89	54.05
TCF3	ENCFF825QLF	HepG2	4403	10.28	8.61	11.85	84.4	34	50.4
CBFB	ENCFF389HNP	HepG2	16053	35.23	32.67	37.63	82.11	36.4	45.7
ZHX3	ENCFF982WOX	HepG2	4675	11.67	8.71	14.45	91.32	32.88	58.44
ZFP36L2	ENCFF743BHX	HepG2	2993	6.88	5.03	8.61	84.66	29.74	54.93
ZBED4	ENCFF888EIP	HepG2	15002	31.23	30.02	32.37	78.63	36.08	42.55
ZNF777	ENCFF428UWW	HepG2	20644	29.84	18.34	40.62	57.69	16.96	40.73
RREB1	ENCFF397FIY	HepG2	15185	27.61	36.93	18.88	65.99	42.59	23.4
ZNF124	ENCFF359JWK	HepG2	15835	32.91	33.83	32.05	78.16	38.33	39.82
NFE2	ENCFF626AMA	HepG2	2592	3.78	4.14	3.44	51.39	27.16	24.23
ZNF503	ENCFF965ADE	HepG2	16519	34.22	38.57	30.14	78.16	42.2	35.96
ONECUT1	ENCFF759WME	HepG2	36563	25.96	36.29	16.26	25.47	17.15	8.31
POGZ	ENCFF464PTM	HepG2	33829	53.7	56.51	51.05	61.19	30.78	30.41
ZCCHC11	ENCFF748PEB	HepG2	7705	16.16	14.45	17.77	79.16	33.91	45.24
TSC22D2	ENCFF640ZVQ	HepG2	8640	19.21	15.14	23.02	83.95	31.85	52.09
MATR3	ENCFF559BWX	HepG2	550	0.86	0.49	1.2	55.82	15.09	40.73
ZNF501	ENCFF355NOU	HepG2	37305	50.37	42.58	57.67	56.37	22.74	33.63
ZNF713	ENCFF124XNU	HepG2	5617	11.02	7.78	14.06	75	25.49	49.51
ZNF788	ENCFF704BJL	HepG2	14383	30.7	25.35	35.73	81.96	32.19	49.77
SOX6	ENCFF677LEF	HepG2	52967	65.98	77.03	55.62	50.73	28.83	21.9
THAP8	ENCFF978LWA	HepG2	3438	6.84	2.7	10.71	77.63	14.83	62.8
KDM5B	ENCFF511KOY	HepG2	19363	34.4	22.11	45.93	71.49	21.88	49.62
NFYB	ENCFF250THA	HepG2	13843	23.18	13.96	31.82	61.19	17.7	43.49
ELF1	ENCFF561HAC	HepG2	22409	42.6	38.45	46.5	70.69	30.52	40.18
ZNF446	ENCFF866GKQ	HepG2	8665	14.94	7.05	22.35	67.19	15.25	51.94
LRRFIP1	ENCFF765MRZ	HepG2	1845	4.12	3.02	5.15	81.9	29	52.9
LCORL	ENCFF723QWP	HepG2	36373	55.28	62.47	48.53	59.29	32.17	27.12
SP1	ENCFF022SPK	HepG2	15630	32.85	21.81	43.2	76.98	24.65	52.33
PRDM15	ENCFF028CNE	HepG2	10195	16.46	11.26	21.34	61.72	20.29	41.42
MNX1	ENCFF288SNR	HepG2	30954	52.49	44.05	60.39	67.74	26.96	40.78
ZNF263	ENCFF236FRR	HepG2	23462	29.76	27.25	32.12	47.92	20.94	26.98
ZNF608	ENCFF650JSG	HepG2	10430	18.62	12.31	24.54	68.83	21.62	47.21
MXI1	ENCFF298UBV	HepG2	16281	34.18	25.19	42.61	77.99	27.23	50.76
ZNF572	ENCFF637PFM	HepG2	11410	16.35	12.01	20.42	53.97	19.25	34.72
RELA	ENCFF588ZSF	HepG2	6386	14.03	11.17	16.71	82.45	31.52	50.92
CEBPZ	ENCFF589EAS	HepG2	360	0.57	0.21	0.91	56.67	10.56	46.11
ZMAT3	ENCFF981WJF	HepG2	18875	34.71	28.05	40.96	71.69	27.6	44.1
EZH2	ENCFF521AKL	HepG2	5982	0.45	0.57	0.33	2.94	1.84	1.1
SMARCC2	ENCFF201OTL	HepG2	1342	2.92	5.12	0.86	76.97	65.13	11.85
ZNF619	ENCFF328OBA	HepG2	11211	20.86	15.91	25.5	72.08	26.25	45.83
NFATC3	ENCFF956GJO	HepG2	5049	10.38	6.41	14.11	78.13	23.39	54.74
ARID4A	ENCFF575UZO	HepG2	24259	44.2	26.51	60.78	77.62	21.3	56.32
EED	ENCFF481KFX	HepG2	9365	16.94	9.31	24.09	69.83	18.41	51.43
SFPQ	ENCFF655NBG	HepG2	19730	34.71	33.24	36.09	68.77	31.4	37.37
ZZZ3	ENCFF117XPT	HepG2	5774	12.85	7.29	18.07	85.68	23.21	62.47
ZNF30	ENCFF391RHE	HepG2	4212	7.66	3.91	11.18	69.9	17.09	52.8
ZNF234	ENCFF104XLA	HepG2	5803	10.42	5.27	15.25	69.43	16.87	52.56
ZNF709	ENCFF311UDM	HepG2	14782	27.17	17.59	36.16	73.31	22.49	50.83
UBTF	ENCFF056VDP	HepG2	35672	52.54	42.92	61.56	61.24	23.56	37.69
ZNF383	ENCFF689AMX	HepG2	4699	8.21	5.65	10.61	67.53	22.3	45.22
EP300	ENCFF702VBV	HepG2	13855	30.14	40.46	20.46	79.42	51.25	28.18
ZNF260	ENCFF291TYB	HepG2	1065	1.93	1.13	2.68	69.48	19.34	50.14
ATF5	ENCFF166CIL	HepG2	5390	10.92	7.19	14.43	77.2	24.53	52.67
ZMYM3	ENCFF128YWI	HepG2	33467	35.23	43.61	27.37	39.94	23.82	16.12
SMAD9	ENCFF707VDL	HepG2	4820	9.53	6.16	12.69	74.36	22.95	51.41
ZNF337	ENCFF457DKJ	HepG2	6773	13.99	10.92	16.87	79.98	29.97	50.01
MEF2D	ENCFF370PHM	HepG2	21294	39.47	43.54	35.66	72.15	38.17	33.98
EGR1	ENCFF769NZQ	HepG2	39735	59.98	55.63	64.06	60.38	26.33	34.05
ZNF800	ENCFF126HMH	HepG2	18543	29.38	25.92	32.63	61.82	25.83	35.99
ZFY	ENCFF968XPF	HepG2	34597	52.92	41	64.1	62.31	22.51	39.8
ZNF335	ENCFF349JFK	HepG2	14787	29.54	27.71	31.25	76.51	34.15	42.36
ADNP	ENCFF962QOB	HepG2	6549	7.24	8.85	5.73	39.99	23.65	16.34
HNF4A	ENCFF711YEK	HepG2	50081	48.39	65.28	32.56	34.85	22.68	12.17
ETS1	ENCFF574HYI	HepG2	4936	9.95	5.05	14.55	78.22	19.19	59.04
ZNF720	ENCFF663OMI	HepG2	1778	3.99	2.8	5.1	80.48	27.39	53.09
ZNF775	ENCFF714LPZ	HepG2	4983	9.2	8	10.33	71.8	30.08	41.72
CEBPB	ENCFF717JGJ	HepG2	17937	18.77	27.96	10.16	36.68	26.45	10.22
RXRA	ENCFF672JLN	HepG2	20516	39.41	38.01	40.73	75.56	35.02	40.54
FUBP1	ENCFF742ZEJ	HepG2	2736	5.16	4.82	5.48	71.05	32.05	39
AKNA	ENCFF579OCV	HepG2	2850	6.02	3.37	8.51	79.58	21.05	58.53
ZNF484	ENCFF342SJZ	HepG2	1124	2.4	1.23	3.51	81.58	19.93	61.65
NRL	ENCFF789ZJN	HepG2	15580	26.01	16.75	34.7	65.58	20.26	45.33
ZNF274	ENCFF243RMX	HepG2	13641	25.94	17.27	34.06	73.39	23.26	50.13
PITX1	ENCFF512NCZ	HepG2	25377	45.74	52.86	39.07	67.95	37.65	30.3
ZNF83	ENCFF007OPT	HepG2	5721	11.36	7.15	15.32	74.9	22.78	52.12
MLLT10	ENCFF183UEL	HepG2	1031	1.74	0.95	2.48	61.78	16.2	45.59
KMT2A	ENCFF960SAF	HepG2	19495	38.38	27.08	48.98	77.46	25.7	51.76
MBD4	ENCFF695SHZ	HepG2	3438	4.85	8.31	1.61	53.93	44.56	9.37
NR2F2	ENCFF681WXL	HepG2	12725	20.93	33.26	9.36	60.32	46.05	14.27
NFE2L1	ENCFF392LXN	HepG2	2629	5.09	2.86	7.19	74.36	19.93	54.43
PRDM10	ENCFF746BIW	HepG2	16326	30.97	31.89	30.1	71.81	35.51	36.3
ZSCAN29	ENCFF896PGF	HepG2	16664	29.48	30.14	28.86	69.77	34.3	35.47
ZBTB7B	ENCFF033TLV	HepG2	28231	48.25	51.03	45.64	65.69	33.32	32.37
DDIT3	ENCFF845NWV	HepG2	1105	2.54	2.63	2.45	85.88	42.9	42.99
JUND	ENCFF281KZH	HepG2	35712	16.5	24.02	9.44	16.23	11.43	4.79
ZIK1	ENCFF149DFX	HepG2	9682	20.2	12.99	26.97	80.43	24.89	55.54
ZNF782	ENCFF042SYC	HepG2	6708	14.62	8.61	20.26	83.65	23.58	60.06
BCL3	ENCFF731MBF	HepG2	14602	27.75	19.69	35.31	75.66	25.84	49.82
ZBTB21	ENCFF347JXF	HepG2	7646	14.4	14.55	14.25	69.15	33.59	35.56
MED1	ENCFF721ULY	HepG2	42026	67.07	75.88	58.82	60.34	32.71	27.63
ZKSCAN5	ENCFF648UYI	HepG2	4739	7.78	6.84	8.65	61.07	25.98	35.09
ZNF530	ENCFF816SRV	HepG2	1813	3.5	1.82	5.07	72.26	17.76	54.5
NR0B2	ENCFF801BTX	HepG2	11942	23.01	13.3	32.1	73.2	20.26	52.95
RFXAP	ENCFF985JDC	HepG2	11932	26.53	21.25	31.48	85.04	32.54	52.5
ZNF607	ENCFF701MWB	HepG2	14837	29	20.26	37.19	76.17	25.65	50.52
AKAP8	ENCFF540SLC	HepG2	12021	20.42	17.33	23.31	65.84	26.9	38.94
ZC3H4	ENCFF035JQZ	HepG2	4831	6.67	5	8.25	52.18	19	33.18
TOE1	ENCFF013QQG	HepG2	4766	11.17	10.08	12.2	89.17	38.77	50.4
FOXJ3	ENCFF091YXG	HepG2	13358	26.36	34.73	18.51	76.25	48.64	27.62
SETDB1	ENCFF186ELR	HepG2	1936	2	1.61	2.37	38.48	15.19	23.3
NCOA5	ENCFF390SPG	HepG2	1413	2.59	2.24	2.93	67.66	28.38	39.28
ZNF281	ENCFF497XRB	HepG2	12877	20.71	21.25	20.19	58.2	28.76	29.43
SMARCE1	ENCFF176QWL	HepG2	606	1.28	2.27	0.34	73.43	63.2	10.23
KDM4B	ENCFF865PLF	HepG2	12090	27.22	27.94	26.55	83.08	40.84	42.23
PHF8	ENCFF127LBZ	HepG2	31951	53.08	36.27	68.84	67.15	21.56	45.58
KDM2A	ENCFF649VKX	HepG2	34907	54.91	44.74	64.45	62.72	23.86	38.86
PATZ1	ENCFF024AEZ	HepG2	40511	57.3	60.82	53.99	52.89	26.7	26.19
DLX6	ENCFF460TXX	HepG2	19237	36.62	43.04	30.59	71.42	40.18	31.24
ZNF138	ENCFF429RZD	HepG2	7877	15.69	8.28	22.64	76.97	19.37	57.6
ATAD3A	ENCFF253ECF	HepG2	1457	3.23	1.82	4.55	80.16	21.89	58.27
NR2F1	ENCFF460HFX	HepG2	17707	24.66	34.63	15.32	52.04	35.28	16.76
ATF3	ENCFF891BJN	HepG2	15396	28.41	29.94	26.97	66.7	33.68	33.02
NRF1	ENCFF520WIR	HepG2	14643	22.04	13.24	30.29	57.98	16.52	41.46
SPEN	ENCFF505DKE	HepG2	24279	46.9	37.49	55.71	75.21	28.45	46.76
YEATS4	ENCFF269IHN	HepG2	26254	47.69	36.36	58.32	73.14	26.21	46.93
ZNF143	ENCFF764XBK	HepG2	12580	23.82	16.22	30.94	71.69	23.17	48.52
BRD4	ENCFF119YIG	HepG2	14684	28.45	22.2	34.3	74.33	28.11	46.23
LCOR	ENCFF381EWF	HepG2	33634	54.96	67.1	43.57	60.04	35.18	24.87
AHDC1	ENCFF418EWE	HepG2	14734	26.62	37.34	16.56	68.91	46.63	22.28
ZNF460	ENCFF362HXG	HepG2	11229	4.41	4.9	3.95	15.26	8.18	7.09
FOXA2	ENCFF296CWC	HepG2	42364	48.54	65.71	32.44	41.81	27.28	14.53
LIN54	ENCFF582HAZ	HepG2	40070	60.92	56.51	65.07	64.33	28	36.34
ZBED5	ENCFF733WWA	HepG2	4441	9.22	5.33	12.87	75.91	21.12	54.78
STAT5B	ENCFF734DQW	HepG2	4597	11.37	9.41	13.21	89.04	35.48	53.56
MTA3	ENCFF827SNM	HepG2	485	1.12	0.51	1.7	80.62	17.73	62.89
E2F4	ENCFF519KUR	HepG2	21664	40.85	28.18	52.72	71.9	23.6	48.3
ZBTB10	ENCFF095JZV	HepG2	8678	16.98	13.35	20.37	74.71	28.15	46.55
ZBTB14	ENCFF072ENL	HepG2	9421	16.95	7.78	25.54	69.13	15.19	53.94
ZNF326	ENCFF496AGX	HepG2	1560	2.58	2.27	2.86	60.38	25.83	34.55
SP140L	ENCFF452TPH	HepG2	4608	9.64	9.73	9.55	79.28	38.72	40.56
KLF12	ENCFF099TJA	HepG2	12873	25.06	16.61	32.98	75.79	24.08	51.71
STAG1	ENCFF514OVO	HepG2	54030	32.88	39.74	26.45	21.75	12.7	9.05
HDAC1	ENCFF339XCW	HepG2	42538	66.66	66.29	67.01	61.96	29.13	32.83
ZBTB1	ENCFF345UAC	HepG2	1514	3.51	2.34	4.61	83.69	26.68	57
CERS6	ENCFF188ULF	HepG2	2459	5.21	2.72	7.56	77.39	19.44	57.95
CBX5	ENCFF574QKP	HepG2	12201	26.02	27.74	24.4	78.75	40.25	38.5
ELF4	ENCFF739XKR	HepG2	9490	16.38	11.35	21.09	68.69	22.64	46.05
TFDP2	ENCFF632WZL	HepG2	22472	45.28	36.19	53.81	76.15	28.88	47.28
ATF6	ENCFF463GXC	HepG2	5158	11.02	9.09	12.83	80.88	31.95	48.93
ZNF485	ENCFF497ADN	HepG2	7174	12.05	8.44	15.44	63.67	21.34	42.33
ZNF687	ENCFF740MUD	HepG2	86813	65.53	51.75	78.46	34.88	13.23	21.65
ZBTB42	ENCFF237WOL	HepG2	7904	14.94	10.44	19.15	73.66	24.9	48.76
BRCA1	ENCFF237LPI	HepG2	9114	18.85	15.44	22.05	78.88	31.01	47.87
THRA	ENCFF270VIF	HepG2	21707	43.3	50.15	36.88	73.68	40.83	32.85
SIX4	ENCFF832KYL	HepG2	12733	26.09	31.72	20.81	74.52	43.48	31.04
ZBTB43	ENCFF499KOY	HepG2	18009	34.44	36.42	32.57	72.34	36.73	35.62
ZNF441	ENCFF995IVE	HepG2	16023	27.94	23.29	32.3	66.29	26.19	40.1
GTF2F1	ENCFF171VVS	HepG2	5957	12.89	10.46	15.17	81.9	32.33	49.57
SOX13	ENCFF935NRC	HepG2	1478	2.19	1.83	2.53	54.26	21.79	32.48
KAT2B	ENCFF461YLX	HepG2	1924	1.64	2.47	0.85	29.68	21.67	8
ZBTB49	ENCFF586SMO	HepG2	2570	5.91	4.54	7.19	81.75	30.16	51.6
ZNF142	ENCFF193QNN	HepG2	14287	26.68	18.93	33.94	72.49	24.52	47.97
MAFK	ENCFF259ECH	HepG2	70131	8.14	11.91	4.59	4.06	2.87	1.18
POLR2AphosphoS2	ENCFF400CVS	HepG2	6252	6.36	3.57	8.97	37.49	10.4	27.1
REST	ENCFF128XEY	HepG2	11234	19.09	20.07	18.18	60.85	30.74	30.11
MYBL2	ENCFF182JRE	HepG2	22403	43.93	44.59	43.31	74.76	35.99	38.77
USF2	ENCFF759SUT	HepG2	2964	5.86	3.95	7.65	81.88	26.08	55.8
ZBTB7A	ENCFF771MKA	HepG2	10088	17.68	16.27	19.01	61.58	27.37	34.21
TCF7L2	ENCFF276DAQ	HepG2	36227	54.39	64.22	45.17	56.67	32.08	24.6
ZNF629	ENCFF034RYJ	HepG2	31506	24.94	28.61	21.49	29	15.99	13.01
IRF3	ENCFF284LUI	HepG2	587	1.26	0.37	2.1	74.96	10.56	64.4
ZEB1	ENCFF788GQZ	HepG2	5980	9.92	14.11	6	63.28	43.26	20.02
NFYA	ENCFF799WBQ	HepG2	16387	33.36	25.72	40.53	76.38	28.26	48.12
SRSF4	ENCFF427GBB	HepG2	2597	3.24	1.41	4.95	48.09	10.51	37.58
SP2	ENCFF766ULD	HepG2	10913	20.77	7.85	32.89	72.53	13.25	59.28
POLR2G	ENCFF496CJE	HepG2	43483	51.25	34.54	66.93	48.15	15.64	32.51
RAD21	ENCFF049KLQ	HepG2	35779	36.4	32.28	40.27	37.74	16.02	21.72
GATA4	ENCFF139ESP	HepG2	10323	23.25	22.35	24.1	83.85	38.36	45.49
SSRP1	ENCFF712IPK	HepG2	10260	14.08	17.21	11.14	51.6	30.51	21.09
RBM39	ENCFF796LVD	HepG2	34006	40.28	24.92	54.67	47.98	14.04	33.94
ZNF792	ENCFF669RYM	HepG2	20979	42.88	44.75	41.12	76.94	38.25	38.7
EHMT2	ENCFF289HHW	HepG2	6984	7.36	11.34	3.63	43.16	32.39	10.77
RFX1	ENCFF881BZS	HepG2	4505	4.27	2.73	5.72	36.18	10.7	25.48
HBP1	ENCFF113RAY	HepG2	14590	28.9	23.31	34.13	74.63	28.84	45.79
CTCF	ENCFF648HFC	HepG2	67568	38.07	36.93	39.14	20.43	9.55	10.88
PRPF4	ENCFF719VLD	HepG2	3828	3.39	3.32	3.46	32.34	15.31	17.03
KDM6A	ENCFF291RTF	HepG2	13453	26.93	41.74	13.04	73.21	54.6	18.61
PLRG1	ENCFF251RCG	HepG2	974	0.01	0.02	0.01	0.41	0.31	0.1
SIN3A	ENCFF803PTU	HepG2	17490	33.73	21.15	45.52	73.66	21.9	51.76
SKI	ENCFF405UGF	HepG2	30926	51.19	57.59	45.2	64.21	34.8	29.42
TCF7	ENCFF646DDZ	HepG2	16928	23.1	38.97	8.21	49.18	40.07	9.11
CCAR2	ENCFF504CCV	HepG2	2660	5.53	5.41	5.64	77.41	36.62	40.79
SRSF9	ENCFF342SIN	HepG2	830	0.01	0.01	0.01	0.48	0.36	0.12
RNF2	ENCFF052BXQ	HepG2	12003	22.27	15.49	28.63	73.8	24.39	49.41
NR2F6	ENCFF597EOO	HepG2	33891	51.44	66.35	37.46	54.79	33.91	20.87
TFAP4	ENCFF831LHT	HepG2	49135	66.7	73.28	60.53	50.41	26.49	23.92
ZBTB40	ENCFF195FFN	HepG2	5367	5.21	1.81	8.4	34.12	5.74	28.38
ZNF3	ENCFF358VSZ	HepG2	7158	10.34	12.77	8.05	54.53	32.27	22.25
KDM1A	ENCFF617QAV	HepG2	31629	36.39	49.73	23.88	49.5	33.35	16.15
KDM5A	ENCFF620WRP	HepG2	11650	18.17	4.84	30.66	66.69	8.15	58.53
HHEX	ENCFF287QGX	HepG2	8057	15.04	23.09	7.49	66.6	49.29	17.31
CBX1	ENCFF566PBY	HepG2	9717	21.37	17.21	25.27	82.62	31.97	50.64
NCOR1	ENCFF337NOK	HepG2	15353	23.61	34.54	13.36	61.45	43.68	17.78
ZNF644	ENCFF203RMY	HepG2	22962	29.86	44.97	15.7	47.17	34.32	12.85
FOXP1	ENCFF786ATC	HepG2	25379	35.53	52.55	19.58	50.58	36.03	14.55
CBX2	ENCFF670RQW	HepG2	2447	0.37	0.31	0.43	5.97	2.41	3.56
SAP130	ENCFF557KBX	HepG2	67058	80.77	83.04	78.64	48.29	23.01	25.28
MIER2	ENCFF822MEL	HepG2	15600	28.05	34.57	21.94	66.15	39.22	26.93
KAT7	ENCFF009BCS	HepG2	14148	27.22	20.2	33.79	75.78	26.65	49.14
ZNF773	ENCFF932NJV	HepG2	4017	9.15	4.41	13.59	83.72	19.37	64.35
NFKBIZ	ENCFF868IVM	HepG2	11512	25.76	28.82	22.9	84.89	45.47	39.42
ZNF7	ENCFF461TFR	HepG2	6258	4.97	5.09	4.85	28.27	13.9	14.37
TAF15	ENCFF889SKN	HepG2	19898	28.21	13.95	41.57	54.98	13.03	41.94
GATAD2A	ENCFF211HPQ	HepG2	54545	63.28	79.36	48.21	44.07	26.79	17.28
MBD1	ENCFF510QJE	HepG2	13961	25.42	25.97	24.92	67.82	33.19	34.64
SP5	ENCFF997EZO	HepG2	22631	42.47	44.34	40.71	68.77	34.46	34.31
CHD4	ENCFF927XNA	HepG2	8524	7.77	10.87	4.87	35.8	24.46	11.34
IKZF5	ENCFF973SAV	HepG2	25170	51.28	54.78	48.01	78.98	40.23	38.76
ASH2L	ENCFF248IAZ	HepG2	39657	54.94	47.93	61.5	60.83	25.45	35.39
ZNF24	ENCFF204MSD	HepG2	3921	6.7	6.46	6.92	61	28.39	32.62
PPARG	ENCFF567JIZ	HepG2	25603	43.02	54.55	32.21	61.7	37.46	24.24
ZNF580	ENCFF408BQV	HepG2	17046	35.54	34.61	36.41	79.16	36.88	42.27
ETV4	ENCFF231DZR	HepG2	18687	35.59	39.33	32.08	71.39	37.72	33.68
MXD4	ENCFF063ZGE	HepG2	20142	41.09	34.45	47.32	79.53	31.54	47.98
KDM3A	ENCFF151FQM	HepG2	15295	33.13	32.82	33.43	82.73	39.1	43.63
KMT2B	ENCFF036WCY	HepG2	21024	43.08	32.99	52.55	79.74	28.77	50.98
ETV6	ENCFF387KML	HepG2	9750	21.69	15.88	27.14	83.41	29.29	54.11
TGIF2	ENCFF584UVU	HepG2	19505	35.5	33.29	37.57	67.82	30.39	37.44
RFX3	ENCFF388AKT	HepG2	5481	8.94	8.06	9.76	58.99	25.63	33.35
GATAD1	ENCFF903ULA	HepG2	24791	51.4	47.14	55.4	78	33.8	44.21
ARID4B	ENCFF434BGG	HepG2	49357	73.32	73.58	73.09	58.81	27.57	31.24
THRB	ENCFF013IAW	HepG2	11999	19.07	26.09	12.49	59.99	39.68	20.31
TRIM22	ENCFF922DRK	HepG2	1192	0.07	0.05	0.08	2.01	0.76	1.26
SMAD4	ENCFF828ZCI	HepG2	41884	62.08	73.67	51.21	53.66	30.55	23.12
MIXL1	ENCFF808DFD	HepG2	26914	43.31	54.25	33.06	59.23	35.58	23.65
RAD51	ENCFF932LVB	HepG2	4365	4.15	3.13	5.1	33.56	12.21	21.35
GMEB2	ENCFF169LKJ	HepG2	5309	13.01	5.19	20.33	91.49	17.91	73.57
GABPA	ENCFF776HYP	HepG2	24382	38.72	35.23	42	59.5	25.96	33.54
MEF2A	ENCFF987BRO	HepG2	6407	13.71	17.58	10.07	80.37	49.6	30.76
GZF1	ENCFF338SBU	HepG2	7921	14.54	10.94	17.91	70.91	25.59	45.32
NR2C2	ENCFF525KBT	HepG2	27647	46.5	42.73	50.04	68.2	29.59	38.6
DNMT1	ENCFF350FND	HepG2	7169	13.12	8.24	17.69	69.73	20.94	48.79
HMGXB3	ENCFF463ZVL	HepG2	13103	27.84	26.26	29.33	79.56	36.05	43.51
YEATS2	ENCFF492KIV	HepG2	11925	27.8	16.79	38.13	90.01	25.88	64.13
MNT	ENCFF649NPR	HepG2	9763	21.66	14.42	28.45	82.31	26.15	56.16
YY1	ENCFF694LNO	HepG2	10068	21.36	11.84	30.28	77.58	20.67	56.91
ARNT	ENCFF055JFR	HepG2	583	0.21	0.26	0.17	12.69	7.55	5.15
ZNF557	ENCFF259TEE	HepG2	7981	17.27	15.52	18.91	81.04	34.88	46.16
ZBTB46	ENCFF995QXT	HepG2	3152	6.18	4.8	7.46	77.44	29.35	48.1
ARNTL	ENCFF049HEP	HepG2	20071	39.22	39.52	38.94	75.66	36.56	39.1
SAFB2	ENCFF867CMD	HepG2	7209	15.23	8.27	21.75	82.85	21.57	61.28
ZSCAN30	ENCFF293DBX	HepG2	5817	9.77	6.77	12.59	65.57	21.7	43.87
GATA2	ENCFF997DRI	HepG2	21135	26.23	37.85	15.34	45.19	31.33	13.85
PBX2	ENCFF295AGS	HepG2	6069	9.67	10.28	9.11	57.8	29.68	28.13
ATF2	ENCFF865OTB	HepG2	21869	45.16	49.96	40.66	76.99	40.7	36.29
ISX	ENCFF872DSQ	HepG2	5194	10.26	5.64	14.58	75.22	20.06	55.16
ZNF224	ENCFF635RWF	HepG2	8427	16.35	10.58	21.77	76.34	23.58	52.76
ZFP82	ENCFF927WNG	HepG2	9187	15.22	8.9	21.15	65.58	18.29	47.3
MXD1	ENCFF828KFT	HepG2	16162	29.05	15.83	41.46	70.81	18.28	52.53
MTF2	ENCFF482HXQ	HepG2	7120	10.61	6.68	14.29	58.22	17.87	40.35
ZFP1	ENCFF317DBA	HepG2	11687	24.51	28.74	20.54	79.28	44.67	34.61
SRF	ENCFF299ZUK	HepG2	5237	8.3	7.28	9.25	55.38	23.49	31.89
ZFP36	ENCFF660SCE	HepG2	3099	2.81	3.94	1.75	32.11	21.88	10.23
HDAC6	ENCFF358RPJ	HepG2	874	1.05	0.5	1.56	47.71	10.87	36.84
SYNCRIP	ENCFF449IXP	HepG2	29	0.01	0	0.01	6.9	0	6.9
TEAD1	ENCFF715HFB	HepG2	34043	45.7	60.48	31.85	49	31.29	17.71
KLF9	ENCFF995GJI	HepG2	7309	16.48	14.02	18.79	85.18	34.9	50.28
RCOR2	ENCFF133ULI	HepG2	20661	33.51	49.59	18.43	61.53	44.12	17.4
HMG20B	ENCFF517FAL	HepG2	13106	28.17	36.39	20.46	78.15	48.56	29.59
PTBP1	ENCFF793YIO	HepG2	2921	5.97	3.36	8.43	77.88	20.99	56.9
MYRF	ENCFF648BIX	HepG2	4021	9.3	6.55	11.88	87.19	29.27	57.92
IRF2	ENCFF856FVD	HepG2	26615	51.83	57.14	46.85	73.03	38.51	34.52
HMG20A	ENCFF245ELB	HepG2	16254	27.93	44.73	12.18	63.12	48.94	14.18
CEBPG	ENCFF642FIX	HepG2	40961	43.04	56.57	30.34	37.32	23.67	13.65
MIER3	ENCFF284RUU	HepG2	15129	32.94	38.26	27.96	80.75	44.93	35.81
FOXK2	ENCFF008HBF	HepG2	8400	16.34	19.8	13.09	68.81	40.24	28.57
ZNF48	ENCFF833GIB	HepG2	22162	39.72	35.99	43.22	70.57	30.33	40.24
RBAK	ENCFF376YBW	HepG2	4099	6.41	7.32	5.55	58.72	32.13	26.59
GABPB1	ENCFF596YTW	HepG2	30365	52.49	38.66	65.45	71.03	24.38	46.65
KAT8	ENCFF688NGY	HepG2	35081	62.81	63.86	61.83	70.38	33.52	36.87
ZNF207	ENCFF967UKB	HepG2	769	0.33	0.16	0.48	14.95	3.64	11.31
ZNF577	ENCFF595JDU	HepG2	1262	2.73	1.3	4.07	83.12	18.7	64.42
ZNF362	ENCFF136MFE	HepG2	14350	17.11	20.93	13.53	45.25	26.76	18.49
USF1	ENCFF048LKP	HepG2	27531	33.57	28.27	38.53	43.98	17.75	26.23
ZKSCAN8	ENCFF796GOO	HepG2	13294	28.04	34.53	21.96	79.11	46.68	32.44
NFIL3	ENCFF056WXQ	HepG2	36803	49.06	64.3	34.76	48	30.27	17.73
ZNF703	ENCFF598AOP	HepG2	5216	10.36	8.63	11.98	79.52	32.23	47.3
NFIA	ENCFF247AAE	HepG2	22329	30.53	40.63	21.07	49.89	32	17.89
ZFP37	ENCFF148XUP	HepG2	9114	19.36	17.42	21.17	79.69	34.49	45.21
PAXIP1	ENCFF825TUP	HepG2	54016	64	75.89	52.85	48.52	28.02	20.5
DR1	ENCFF043PLX	HepG2	9135	20.34	9.49	30.5	87.47	19.56	67.9
E2F5	ENCFF732NHA	HepG2	7170	16.33	6.78	25.28	83.14	16.57	66.57
XRCC5	ENCFF305SZV	HepG2	31534	42.65	40.86	44.33	51.3	23.52	27.77
HNRNPUL1	ENCFF323QVV	HepG2	3411	5.44	4.48	6.34	60.54	24.39	36.15
ZNF317	ENCFF051JQT	HepG2	22692	35.7	35.43	35.96	60.91	29.09	31.82
MAF1	ENCFF201XPX	HepG2	6877	15.07	9.1	20.67	83.64	24.02	59.62
ZFP14	ENCFF702UPM	HepG2	2221	4.63	3.45	5.73	78.48	28.23	50.25
NFAT5	ENCFF758KHO	HepG2	8796	18.02	10.31	25.25	76.52	21.02	55.5
FOXK1	ENCFF791TBH	HepG2	16577	35.78	38.61	33.13	79.79	41.22	38.57
E2F2	ENCFF987IVP	HepG2	3437	8.05	4.33	11.54	86.5	22.55	63.95
JUN	ENCFF355KJO	HepG2	12651	24.77	29.08	20.73	74.33	41.96	32.38
ZNF570	ENCFF856VYT	HepG2	2120	4.61	2.25	6.82	83.87	19.15	64.72
ZNF121	ENCFF817UOJ	HepG2	31485	21.73	22.04	21.44	26.02	12.68	13.34
TIGD3	ENCFF638OVC	HepG2	4319	8.7	5.11	12.07	77.98	21.93	56.05
DMTF1	ENCFF886PNQ	HepG2	3385	6.61	4.31	8.77	73.94	23.13	50.81
GMEB1	ENCFF665DFU	HepG2	16209	33.82	20.18	46.61	85.74	23.76	61.97
IRF5	ENCFF649YZW	HepG2	10476	18.93	10.94	26.42	69.85	19.35	50.5
ZBTB25	ENCFF398WWD	HepG2	17736	37.16	37.18	37.13	79.28	37.91	41.37
ZNF296	ENCFF959TJF	HepG2	6417	10.91	8.84	12.86	63.86	24.95	38.91
ZNF101	ENCFF719YFZ	HepG2	2367	4.97	2.94	6.87	81.07	23.49	57.58
HMGXB4	ENCFF465GLH	HepG2	33494	50.13	38.21	61.31	62.81	22.38	40.44
TBX2	ENCFF162BJS	HepG2	37532	60.92	63.89	58.15	65.82	32.92	32.89
SNRNP70	ENCFF310GVX	HepG2	289	0.29	0.16	0.42	39.79	10.38	29.41
ZNF280B	ENCFF763FLS	HepG2	13118	22.3	14.24	29.85	64.33	19.69	44.64
ZBTB3	ENCFF972RKU	HepG2	6523	13.02	12.18	13.81	78.66	35.31	43.35
PAWR	ENCFF610NSO	HepG2	2160	4.52	2.5	6.41	80.46	21.62	58.84
ZNF615	ENCFF397QBT	HepG2	5168	9.34	7.05	11.49	70.3	25.37	44.93
DPF2	ENCFF599FAQ	HepG2	13455	26.24	41.65	11.79	72.65	55.62	17.03
ZBTB24	ENCFF702ULZ	HepG2	1422	2.42	1.63	3.17	63.01	20.04	42.97
HMGA1	ENCFF490TYP	HepG2	133	0.18	0.17	0.18	48.87	23.31	25.56
MTF1	ENCFF562QVL	HepG2	3827	8.3	4.38	11.98	81.5	20.93	60.57
FIP1L1	ENCFF761RXC	HepG2	1762	3.98	2.41	5.45	86.04	25.99	60.05
HOXD1	ENCFF042QIU	HepG2	13292	28.97	26.53	31.25	81.97	35.62	46.35
IRF1	ENCFF174QAR	HepG2	2801	5.84	3.29	8.23	80.47	22.06	58.41
HNF1B	ENCFF890HTY	HepG2	33019	51.2	52.89	49.62	59.97	29.84	30.13
HNRNPH1	ENCFF055HMB	HepG2	2631	4.78	3.07	6.38	67.84	21.32	46.52
HNRNPL	ENCFF163UML	HepG2	23788	26.15	21.86	30.18	42.69	17.12	25.57
NBN	ENCFF052NNP	HepG2	1428	0.28	0.3	0.26	7	3.64	3.36
NFYC	ENCFF666PKI	HepG2	14137	25.23	17.67	32.32	65.35	22.08	43.26
ZNF318	ENCFF206IFJ	HepG2	7433	14.13	12.25	15.89	71.59	29.96	41.63
ZNF333	ENCFF740MCS	HepG2	7509	14.54	8.35	20.34	74.8	20.66	54.15
RXRB	ENCFF055PGX	HepG2	35646	57.45	70.35	45.35	59.28	34.77	24.51
ZNF614	ENCFF941XGS	HepG2	17040	35.72	42.85	29.05	78.6	45.32	33.28
PHF5A	ENCFF944XYP	HepG2	10485	22.75	23.95	21.63	81.81	41.3	40.52
PHB2	ENCFF597SCY	HepG2	732	0.01	0.01	0.01	0.41	0.27	0.14
RBM22	ENCFF457BJI	HepG2	36833	13.09	12.17	13.94	13.51	6.1	7.41
CEBPA	ENCFF713MLA	HepG2	52144	40.96	58.13	24.85	27.89	19.13	8.75
HLF	ENCFF389WFG	HepG2	64899	18.45	25.66	11.69	9.95	6.7	3.25
ZGPAT	ENCFF329HLR	HepG2	40961	68.07	72.19	64.21	68.81	34.67	34.14
ZBTB26	ENCFF358WAV	HepG2	13505	26.5	25.17	27.75	73.98	33.56	40.42
ZNF574	ENCFF165QEH	HepG2	35811	61.25	57.04	65.2	66.2	29.05	37.15
SUZ12	ENCFF482HFQ	HepG2	1860	4.03	1.38	6.52	75.59	12.53	63.06
ZKSCAN1	ENCFF050IGN	HepG2	6770	8.06	8.87	7.3	43.65	23.32	20.32
ZNF639	ENCFF070QDA	HepG2	11832	26.83	19.68	33.54	86.23	30.36	55.87
THAP11	ENCFF397AJQ	HepG2	37039	63.86	65.12	62.67	66.05	31.72	34.34
TBX3	ENCFF279ROV	HepG2	7920	16.12	20.89	11.64	73.89	46.04	27.85
RFXANK	ENCFF731KLY	HepG2	7192	15.72	14.15	17.19	83.43	36.04	47.39
ZNF511	ENCFF612MNU	HepG2	17895	37.22	40.75	33.91	78.25	41.1	37.15
RBPJ	ENCFF303KJW	HepG2	16337	37.25	36.75	37.72	86.82	41.05	45.76
ZSCAN9	ENCFF302EGM	HepG2	17798	36.74	39.05	34.57	77.65	39.57	38.08
ZFP64	ENCFF895ZWZ	HepG2	9448	13.58	11.24	15.78	53.81	21.35	32.46
NFIC	ENCFF226RTJ	HepG2	12473	19.51	31.31	8.45	60.94	47.38	13.56
TFDP1	ENCFF260VQA	HepG2	13499	29.89	21.58	37.68	81.49	28.22	53.26
ZNF205	ENCFF482IUF	HepG2	18921	37.96	40.81	35.3	75.05	38.71	36.34
DNMT3B	ENCFF469JVY	HepG2	9508	18.14	17.95	18.33	72.23	34.24	37.99
ZNF768	ENCFF654RZY	HepG2	19429	24.08	16.02	31.64	46.71	14.86	31.85
MLX	ENCFF048HPB	HepG2	15236	33.35	41.84	25.39	79.96	48.14	31.83
ZNF660	ENCFF732OUU	HepG2	746	1.7	0.95	2.4	87.4	24.4	63
TAF1	ENCFF859JSG	HepG2	23477	43.57	23.99	61.92	75.84	19.87	55.97
ZNF232	ENCFF394XIE	HepG2	10843	22.68	18.18	26.91	79.15	30.49	48.66
DMAP1	ENCFF423IFD	HepG2	25606	49.36	41.4	56.82	77.68	30.7	46.98
ETV5	ENCFF072RWQ	HepG2	19907	40.66	41.11	40.24	74.88	36.25	38.63
MAFF	ENCFF643LNZ	HepG2	41480	8.77	13.69	4.15	7.44	5.61	1.82
GTF3A	ENCFF413CKX	HepG2	6808	12.28	8.88	15.46	70.04	24.46	45.58
TBP	ENCFF935CJP	HepG2	2477	5.58	3.14	7.86	83.77	22.57	61.2
ZNF778	ENCFF996HUI	HepG2	3703	6.65	3.03	10.04	70.05	15.28	54.77
STAT6	ENCFF009YMJ	HepG2	7774	15.66	16.53	14.85	79.83	40.21	39.62
CHD2	ENCFF369UGC	HepG2	6114	12.81	6.24	18.97	76.01	17.91	58.1
AGO1	ENCFF130JQD	HepG2	13406	18.39	9.22	27	54.1	13.12	40.98
ZSCAN22	ENCFF120MEJ	HepG2	5843	9.71	7.39	11.89	64.4	23.43	40.97
SNAI1	ENCFF713BCF	HepG2	9986	17.23	11.27	22.82	67.61	21.39	46.22
ZNF761	ENCFF670IOD	HepG2	16202	29.28	24.54	33.71	71.6	28.71	42.9
FOXP4	ENCFF334AQD	HepG2	35420	54.78	67.98	42.41	57.75	34.41	23.35
ZBTB4	ENCFF628ORL	HepG2	9091	15.87	14.36	17.29	67.78	29.56	38.22
SATB2	ENCFF231FHP	HepG2	7165	14.32	11.07	17.37	76.32	28.61	47.7
SMC3	ENCFF492IMA	HepG2	25211	13.37	20.89	6.31	18.69	14.13	4.56
ZXDC	ENCFF623NDC	HepG2	7119	13.55	8.77	18.04	73.34	22.91	50.43
ZNF10	ENCFF696UAH	HepG2	643	1.1	0.62	1.55	63.3	16.95	46.35
DZIP1	ENCFF718UWQ	HepG2	6642	12.97	6.48	19.05	74.45	17.75	56.7
ZNF776	ENCFF883RGN	HepG2	10494	19.53	9.94	28.52	72.9	17.82	55.08
ZNF549	ENCFF430MJE	HepG2	2446	4.93	3.79	6	75.06	27.51	47.55
ZNF597	ENCFF396EJG	HepG2	1109	2.44	1.2	3.6	80.88	19.39	61.5
MTA1	ENCFF656AKR	HepG2	12032	24.67	24.98	24.39	79.08	38.72	40.36
RFX5	ENCFF170RLS	HepG2	6435	11.44	7.13	15.47	64.1	19.32	44.79
MED13	ENCFF733RMW	HepG2	11026	23.97	21.41	26.37	82.47	35.17	47.3
CREM	ENCFF847YQG	HepG2	1758	4.51	1.31	7.51	89.82	12.57	77.25
NONO	ENCFF847WTF	HepG2	20309	37.88	18.62	55.93	73.73	17.4	56.33
ZNF697	ENCFF385UIF	HepG2	15331	29.16	23.92	34.08	71.18	28.02	43.16
ZNF674	ENCFF252BNC	HepG2	4700	8.85	4.26	13.16	73	16.87	56.13
ZNF384	ENCFF449KJR	HepG2	17277	11.89	15.61	8.4	24.45	15.51	8.94
RBFOX2	ENCFF756RMH	HepG2	49697	46.23	27.44	63.85	39.53	11.08	28.45
NFKB2	ENCFF098AHH	HepG2	11291	24.25	15.32	32.63	83.14	24.93	58.21
ARID3A	ENCFF694XNQ	HepG2	19696	24.26	35.28	13.92	44.98	31.55	13.42
ZHX2	ENCFF556OVK	HepG2	10312	23.73	17.84	29.25	84.99	30.77	54.22
HNRNPLL	ENCFF886DRH	HepG2	26610	38.01	19.33	55.53	58.06	13.96	44.09
TBL1XR1	ENCFF694AOE	HepG2	9428	20.64	23.95	17.53	80.26	44.65	35.61
SP110	ENCFF235TCN	HepG2	2832	5.76	3.27	8.1	78.32	21.68	56.64
HCFC1	ENCFF391KIU	HepG2	5602	13.56	4.13	22.4	86.25	12.82	73.44
NFE2L2	ENCFF876OXC	HepG2	9008	3.87	5.22	2.59	15.09	9.86	5.23
HNRNPK	ENCFF542LXI	HepG2	24334	15.04	6.19	23.34	23.83	4.64	19.19
AGO2	ENCFF348MDS	HepG2	45674	27.05	12.28	40.91	24.82	5.42	19.4
SIN3B	ENCFF817MLD	HepG2	5012	11.64	4.8	18.05	85.24	17.02	68.22
ZNF282	ENCFF637KAI	HepG2	1066	0.14	0.15	0.14	4.78	2.35	2.44
KLF11	ENCFF137AWT	HepG2	10408	22.58	20.97	24.09	82.06	36.43	45.63
RERE	ENCFF283JPC	HepG2	11038	24.77	33.36	16.72	82.4	53.24	29.15
ATF7	ENCFF276IMS	HepG2	8430	17.98	16.65	19.23	81.28	36.47	44.82
ATF1	ENCFF363ZSJ	HepG2	12848	22.17	21.25	23.03	68.92	31.67	37.25
ELF3	ENCFF358NYG	HepG2	39080	60.04	67.65	52.91	57.18	30.74	26.44
ZNF770	ENCFF588FNM	HepG2	39570	31.35	28.14	34.36	31.46	13.61	17.85
ZNF510	ENCFF573VMV	HepG2	10210	19.16	14.17	23.83	73.01	25.87	47.14
ZNF652	ENCFF054CBG	HepG2	11602	12.47	16.18	9	39.42	24.62	14.8
BCL6	ENCFF932UJW	HepG2	39283	54.96	67.79	42.93	51.21	30.25	20.95
TFE3	ENCFF911OIW	HepG2	22672	43.19	48.94	37.8	70.64	38.31	32.33
NFRKB	ENCFF252JYE	HepG2	1556	2.78	0.66	4.77	63.69	7.26	56.43
HNF1A	ENCFF240DSS	HepG2	13809	28.56	29.8	27.39	81.03	41.05	39.98
YBX1	ENCFF813SPM	HepG2	2990	0.05	0.08	0.02	0.57	0.47	0.1
HINFP	ENCFF718SEF	HepG2	12174	25.21	20.23	29.87	79.15	30.46	48.69
E2F1	ENCFF509VPA	HepG2	10958	23.01	11.09	34.19	81.15	18.59	62.56
NAIF1	ENCFF264GUG	HepG2	10229	18.09	12.89	22.97	70.41	23.84	46.56
ZNF839	ENCFF395CSH	HepG2	4751	10.02	5.54	14.21	81.25	21.43	59.82
ZBTB37	ENCFF152JUI	HepG2	7544	13.2	16.19	10.4	67.25	39.97	27.28
NKX3-1	ENCFF838IXI	HepG2	12290	25.38	21.12	29.37	78.21	31.18	47.03
FOXO1	ENCFF068YNL	HepG2	22172	45.71	55.51	36.53	74.49	43.44	31.05
THAP9	ENCFF573HLA	HepG2	15160	27.79	17.86	37.09	75.45	22.72	52.72
ZNF490	ENCFF088FSM	HepG2	3371	4.78	3.62	5.86	55.12	20.14	34.97
ZNF382	ENCFF158ZLL	HepG2	222	0.09	0.14	0.05	17.57	12.61	4.95
FUBP3	ENCFF760OHO	HepG2	6635	13.76	11.05	16.29	79.89	30.66	49.24
ZNF691	ENCFF199ILE	HepG2	14658	28.27	25.94	30.45	73.34	32.26	41.08
ZNF891	ENCFF876YSX	HepG2	16309	27.23	17.17	36.66	64.25	19.34	44.91
ZNF737	ENCFF241CGC	HepG2	2879	5.27	3.05	7.35	69.64	19.42	50.23
AFF4	ENCFF423ZMT	HepG2	6855	12.21	10.66	13.66	69.07	29.12	39.96
GFI1	ENCFF821FDT	HepG2	21322	34.32	40.88	28.17	63.06	36.05	27.01
FOXM1	ENCFF488UEC	HepG2	2440	5.66	2.88	8.27	83.16	20.37	62.79
ZNF678	ENCFF418FOX	HepG2	5606	11.8	6.64	16.64	80.59	21.94	58.65
RNF219	ENCFF216WUU	HepG2	3683	6.53	6.16	6.87	69.29	31.82	37.47
ZNF367	ENCFF822NPN	HepG2	2731	6.13	3.1	8.97	84.25	20.4	63.86
ZNF350	ENCFF094QEU	HepG2	23006	41.79	36.51	46.74	74.28	30.92	43.35
RORA	ENCFF951EMJ	HepG2	1427	2.38	3.15	1.66	64.4	41.56	22.85
ZNF550	ENCFF731WIR	HepG2	4386	7.99	5.12	10.69	68.92	21.59	47.33
RARG	ENCFF660XKF	HepG2	3260	6.35	3.81	8.74	76.29	22.3	53.99
SMAD1	ENCFF224UON	HepG2	5813	12.33	7.57	16.79	82.45	24.27	58.18
LBX2	ENCFF391NQU	HepG2	4900	10.19	5.48	14.6	77.92	20.18	57.73
ZNF766	ENCFF612XIV	HepG2	8947	19.42	14.25	24.26	82.78	29.03	53.75
TEF	ENCFF019SUK	HepG2	7126	13.11	10.41	15.65	68.83	26.03	42.8
FOXA3	ENCFF966LKN	HepG2	46982	60.31	72.86	48.53	46.91	27.17	19.74
PAF1	ENCFF404XCS	HepG2	5113	3.61	3.74	3.49	27.01	13.75	13.26
ZNF276	ENCFF234KOS	HepG2	10029	19.8	15.04	24.25	76.36	27.8	48.56
ZNF609	ENCFF388MQU	HepG2	19648	38.61	46.92	30.83	74.93	43.77	31.16
SOX5	ENCFF572TDN	HepG2	29370	46.13	61.5	31.71	57.87	37.15	20.72
POLR2AphosphoS5	ENCFF483FKZ	HepG2	29014	42.59	26.29	57.88	56.78	16.78	39.99
AHR	ENCFF674NDV	HepG2	6244	14.68	10.51	18.58	88.89	30.4	58.49
HOMEZ	ENCFF866VHP	HepG2	21345	36.99	46.34	28.23	63.53	38.3	25.23
ZNF710	ENCFF443DLW	HepG2	17874	33.3	36.87	29.94	71.81	38.21	33.6
ZSCAN31	ENCFF560APA	HepG2	20561	37.88	30.71	44.61	73.69	28.42	45.27
PLSCR1	ENCFF327XJK	HepG2	1705	3.19	1.58	4.7	72.61	17.54	55.07
ZNF256	ENCFF612NCS	HepG2	7548	15.54	10.71	20.07	77.08	25.38	51.7
GPBP1L1	ENCFF111TVQ	HepG2	27	0.01	0.01	0.01	7.41	3.7	3.7
ZFX	ENCFF098VWY	HepG2	46694	61.64	53.98	68.83	54.64	22.29	32.35
ISL2	ENCFF608QXN	HepG2	29135	52.08	58.74	45.84	67.94	36.56	31.38
PCBP1	ENCFF884TSX	HepG2	11274	15.3	7.47	22.64	51.84	12.12	39.73
ERF	ENCFF487FCZ	HepG2	29660	56.16	59.53	53.01	72.56	36.43	36.13
ZNF526	ENCFF556HNR	HepG2	5436	11.11	6.27	15.65	76.12	20.6	55.52
KLF16	ENCFF742BYA	HepG2	29488	55.22	55.44	55.01	72.22	34.41	37.81
PHF20	ENCFF176BYA	HepG2	16085	31.79	14.59	47.92	78.63	17.12	61.52
ZNF217	ENCFF696RIZ	HepG2	26779	47.69	60.27	35.89	66.97	40.71	26.26
HSF2	ENCFF932DAC	HepG2	5487	8.58	7.66	9.45	58.03	24.55	33.48
ESRRA	ENCFF022ALT	HepG2	14229	28.45	30.04	26.96	76.08	38.51	37.56
ZNF513	ENCFF422MYG	HepG2	2866	6.08	3.57	8.43	77.81	21.91	55.9
DRAP1	ENCFF596EYH	HepG2	24225	47.98	45.6	50.21	73.73	33.75	39.97
ELK1	ENCFF079BRO	HepG2	8897	19.8	15.99	23.37	83.29	32.21	51.07
ZNF772	ENCFF432AEF	HepG2	18158	35.58	30.89	39.98	76.08	31.5	44.58
ZNF180	ENCFF745TIW	HepG2	1767	3.92	2.01	5.72	82.8	20.43	62.37
ZNF512	ENCFF860GTX	HepG2	5186	5.62	4.66	6.53	41.34	16.37	24.97
GPN1	ENCFF926PNY	HepG2	1830	4.26	1.76	6.62	85.57	16.78	68.8
XBP1	ENCFF144DWU	HepG2	3086	7	4.68	9.17	84.93	27.06	57.87
ZBTB8A	ENCFF659VBS	HepG2	2737	5.91	3.45	8.21	82.61	22.98	59.63
RARA	ENCFF051RBF	HepG2	43755	56	70.85	42.08	46.49	28.18	18.32
CREB3	ENCFF792EMG	HepG2	7031	14.2	8.82	19.24	77.31	23.06	54.26
ZSCAN20	ENCFF038DPK	HepG2	8902	17.86	12.29	23.09	76.71	25.04	51.67
ZNF230	ENCFF718FEV	HepG2	11608	23.24	16.35	29.69	78.62	26.52	52.09
HOXA3	ENCFF221IVJ	HepG2	35726	61.88	62.36	61.43	65.74	31.43	34.31
MXD3	ENCFF098WCH	HepG2	15333	31.47	19.37	42.8	79.75	23.26	56.49
FUS	ENCFF682NJA	HepG2	7716	14.63	5.17	23.5	71.88	12.18	59.69
HOXA5	ENCFF097HFR	HepG2	20805	39.08	35.4	42.52	72.2	31.16	41.05
TARDBP	ENCFF978CQE	HepG2	5894	10.99	3.62	17.9	70.41	11.33	59.08
SRSF1	ENCFF321UQK	HepG2	11174	19.84	10.27	28.82	69.12	17.31	51.82
SMAD3	ENCFF514EHR	HepG2	20204	39.68	45.17	34.52	73.98	40.21	33.77
ZNF548	ENCFF920CNM	HepG2	12254	24.05	19.11	28.69	76.26	28.99	47.27
ATRX	ENCFF674JQI	HepG2	394	0.8	0.59	1	73.86	25.63	48.22
ZC3H8	ENCFF710WEN	HepG2	8636	17.03	12.33	21.43	77.95	27.15	50.8
U2AF1	ENCFF057MJF	HepG2	5972	11.47	7.17	15.5	75.12	22.64	52.48
U2AF2	ENCFF419PQH	HepG2	3006	5.08	2.4	7.6	64.37	14.74	49.63
ZNF556	ENCFF922AIE	HepG2	13041	27.16	23.82	30.28	80.83	33.88	46.95
ZNF543	ENCFF882RAQ	HepG2	17769	32.28	25.99	38.17	71.87	27.72	44.14
ZNF343	ENCFF956GVV	HepG2	12772	24.22	18.08	29.98	74.36	26.41	47.95
ZFP62	ENCFF428YYT	HepG2	1243	2.83	1.43	4.14	83.02	20.27	62.75
ONECUT2	ENCFF476NUG	HepG2	10197	16.21	19.61	13.02	57.74	33.51	24.23
ZNF740	ENCFF455XDQ	HepG2	10191	17.36	12.87	21.57	64.17	22.77	41.41
ZNF639	ENCFF645OCW	K562	1173	0.55	0.23	0.8	7.67	1.45	6.22
UBTF	ENCFF401MXT	K562	18962	35.82	27.8	42.3	34.17	11.7	22.47
GATA1	ENCFF221OWW	K562	12033	23.39	40.44	9.62	32.25	24.87	7.38
SUZ12	ENCFF943SUL	K562	2534	6.71	2.46	10.14	43.76	7.18	36.58
RNF2	ENCFF359QAT	K562	2237	8.54	12.54	5.32	73.49	48.82	24.68
SIN3A	ENCFF503JBM	K562	12514	31.2	13.95	45.15	46.57	9.12	37.45
ZC3H11A	ENCFF163FGU	K562	2125	6.87	5.09	8.31	55.86	18.54	37.32
SETDB1	ENCFF267QRI	K562	1660	5.26	3.31	6.84	55.36	15.66	39.7
NFE2	ENCFF667ZVG	K562	39040	23.94	41.76	9.54	10.41	8.12	2.3
MAZ	ENCFF014UGE	K562	31470	60.57	51.17	68.16	35.81	13.19	22.61
CREBBP	ENCFF532VPN	K562	772	0.3	0.39	0.23	6.61	3.89	2.72
NR1H2	ENCFF227NZO	K562	2955	7.95	4.57	10.68	49.48	12.42	37.06
SIX5	ENCFF677LXO	K562	3360	11.37	2.63	18.43	56.22	5.8	50.42
SREBF2	ENCFF112EOX	K562	1398	3.5	2.29	4.47	44.64	13.3	31.33
CTCF	ENCFF901CBP	K562	55932	24.17	20	27.54	7.17	2.64	4.53
NR2F6	ENCFF246VEZ	K562	2300	7.39	7.27	7.49	54.17	23.91	30.26
JUND	ENCFF471YUP	K562	41727	65.02	72.28	59.14	26.17	12.93	13.24
MYC	ENCFF664GSV	K562	30298	65.54	60.26	69.8	38.81	15.56	23.25
ATF6	ENCFF913KVF	K562	5405	16.16	9.66	21.41	55.34	14.76	40.57
ETV5	ENCFF543NUM	K562	15339	43.14	38.81	46.64	51.74	20.56	31.18
TCF3	ENCFF564PCC	K562	31560	44.85	62.24	30.8	24.62	15.1	9.51
FOXJ3	ENCFF370RQD	K562	1317	1.66	1.87	1.48	21.64	10.86	10.78
ZNF184	ENCFF535BWZ	K562	1330	0.21	0.22	0.2	2.56	1.2	1.35
STAG1	ENCFF282TIA	K562	5737	4.71	4.1	5.21	14.24	5.49	8.75
AFF1	ENCFF671NPK	K562	16658	37.51	45.69	30.89	41	22.39	18.6
USF2	ENCFF789KFF	K562	16242	14.61	11.08	17.47	14.96	5.05	9.91
RAD21	ENCFF057JFH	K562	33306	24.7	29.59	20.76	12.88	6.94	5.94
ZBTB7A	ENCFF937VKL	K562	21110	32.88	24.03	40.03	27.88	8.9	18.98
HDAC6	ENCFF499GKO	K562	790	1.75	1.03	2.32	37.09	9.75	27.34
YY1	ENCFF096MGF	K562	4212	12.97	3.84	20.35	51.9	6.89	45.01
ZBTB33	ENCFF747BIJ	K562	53417	5.97	8.32	4.07	2	1.24	0.75
POLR2A	ENCFF286QTF	K562	24264	54.61	40.86	65.71	43	14.26	28.74
BRCA1	ENCFF497PDJ	K562	2281	2.61	1.3	3.67	20.12	4.34	15.78
SMARCA4	ENCFF193CLQ	K562	7426	26.72	36.97	18.43	64.62	39.87	24.75
ATF3	ENCFF107DBQ	K562	43885	27.14	41.5	15.53	12.67	8.76	3.91
MNT	ENCFF624GUO	K562	27453	56.6	49.33	62.48	39.48	14.97	24.51
RCOR1	ENCFF703TCX	K562	4616	14.58	22.4	8.26	53.79	36.7	17.09
SRF	ENCFF243XDG	K562	10443	25.67	20.91	29.53	43.92	15.69	28.24
ETS1	ENCFF886BDQ	K562	14110	39.79	25.8	51.1	50.25	14.29	35.96
ATF1	ENCFF982WDO	K562	3238	11.13	3.65	17.18	57.01	8.31	48.7
MAX	ENCFF034DOZ	K562	30091	62.99	56.7	68.08	36.38	14.39	21.99
ARID3A	ENCFF563SWF	K562	10728	21.81	34.99	11.16	34.97	25.05	9.93
SMAD5	ENCFF973ZVM	K562	17317	41.82	18.33	60.81	45.1	8.73	36.37
CHD1	ENCFF408NUX	K562	11261	13.98	6.53	20	22.58	4.7	17.88
BRF2	ENCFF748HCN	K562	34	0.09	0.09	0.09	44.12	20.59	23.53
PHF8	ENCFF727AEY	K562	14696	37.23	10.13	59.12	48.52	5.93	42.59
CHD4	ENCFF319EST	K562	1684	2.06	2.56	1.64	21.97	12.17	9.8
GTF2F1	ENCFF248GSH	K562	16248	50.61	44.16	55.82	55.83	21.47	34.35
JUNB	ENCFF932KRN	K562	4205	10.31	13.51	7.73	40.57	23.73	16.84
TCF7L2	ENCFF192HNC	K562	1760	6	4.02	7.6	57.22	17.05	40.17
GATA2	ENCFF771FRJ	K562	15193	26.36	45.61	10.8	30.11	23.37	6.73
RBBP5	ENCFF044FPH	K562	18042	36.33	20.88	48.83	39.78	9.82	29.96
NELFE	ENCFF024VAA	K562	427	1.78	0.75	2.62	72.13	13.35	58.78
SIRT6	ENCFF821XJU	K562	745	1.24	0.91	1.5	29.4	9.66	19.73
MYNN	ENCFF841BNU	K562	913	0.48	0.35	0.58	8.65	2.85	5.81
MTA1	ENCFF352BVR	K562	12572	36.66	46.25	28.91	51.99	29.43	22.56
NCOR1	ENCFF804CIZ	K562	24331	46.75	62.37	34.12	33.1	19.58	13.53
ETV6	ENCFF283LUV	K562	4816	14.04	19.86	9.34	52.12	32.77	19.35
POLR2AphosphoS2	ENCFF404YSJ	K562	6424	9.46	5.81	12.41	26.74	7.27	19.47
RFX5	ENCFF434PQM	K562	2163	5.49	3.7	6.93	43.27	13.08	30.19
TRIM25	ENCFF792LVS	K562	3995	14.18	22.59	7.38	60.7	43.05	17.65
REST	ENCFF572YTS	K562	10104	24.35	16.69	30.55	43.13	13.05	30.08
SP1	ENCFF984FGT	K562	11730	29.84	11.83	44.4	48.06	8.3	39.75
CHD7	ENCFF722UJW	K562	1176	2.46	2.04	2.81	35.37	13.01	22.36
ZNF12	ENCFF930HGO	K562	5879	12.52	6.92	17.05	38.51	9.44	29.07
THAP1	ENCFF041ABM	K562	3802	13.37	4.16	20.81	60.31	8.29	52.03
CBFB	ENCFF012EVG	K562	6874	15.92	13.65	17.75	41.37	15.83	25.55
KDM5B	ENCFF933VQA	K562	374	1.41	0.47	2.16	71.66	11.23	60.43
EZH2	ENCFF080JPV	K562	1236	0.49	0.75	0.27	6.55	4.53	2.02
E2F6	ENCFF120RKU	K562	20062	39.39	24.73	51.23	34.2	9.51	24.69
CREB1	ENCFF576BKY	K562	14632	46.31	37.53	53.41	55.71	19.87	35.85
RUNX1	ENCFF270PPM	K562	3232	12.86	15.78	10.5	67.7	37.07	30.63
CBX2	ENCFF258XBJ	K562	2980	0.01	0	0.01	0.03	0	0.03
ZMIZ1	ENCFF976WVR	K562	643	1.46	0.75	2.04	37.79	8.55	29.24
MEIS2	ENCFF580PVN	K562	42904	45.06	54.7	37.27	17.78	9.64	8.14
BACH1	ENCFF553DTU	K562	11562	19.93	32.03	10.14	34.43	25.08	9.35
MAFK	ENCFF188OEK	K562	21143	19.64	29.72	11.49	15.57	10.47	5.09
SMARCB1	ENCFF359MKF	K562	2030	4.4	7.22	2.12	39.95	29.41	10.54
HDAC2	ENCFF339LFS	K562	28194	52.99	64.46	43.73	33.58	18.18	15.4
CBX3	ENCFF068OEJ	K562	752	0.5	0.42	0.57	11.04	4.12	6.91
CHD2	ENCFF454FVE	K562	9093	24.72	13.81	33.53	46.67	11.7	34.97
CREB3L1	ENCFF934IZG	K562	12837	38.52	25.49	49.06	59.64	17.15	42.49
CBX5	ENCFF813SKN	K562	5288	8.28	8.72	7.92	26.91	12.56	14.35
SREBF1	ENCFF040KFQ	K562	2665	9.94	5.56	13.48	64.17	15.8	48.37
CREM	ENCFF832RYO	K562	36816	69.44	68.63	70.1	31.99	14	17.99
POU5F1	ENCFF570LRX	K562	1442	6.43	1.9	10.1	74.34	9.78	64.56
ZKSCAN1	ENCFF948WSE	K562	12354	25.75	23.65	27.45	36.24	14.64	21.6
CEBPZ	ENCFF161IQF	K562	1047	2.36	0.75	3.66	38.4	5.44	32.95
BCLAF1	ENCFF966JHD	K562	1057	1.02	1.38	0.72	16.37	10.03	6.34
TARDBP	ENCFF564QOL	K562	8537	27.77	20.09	33.97	59	18.55	40.45
ZFP36	ENCFF574TFC	K562	22689	16.28	18.34	14.62	12.15	6.1	6.05
HDAC1	ENCFF638PDM	K562	35841	65.91	67.59	64.56	33.25	15	18.25
XRCC5	ENCFF704NMU	K562	10983	25.99	19.41	31.3	42.82	14.22	28.6
FIP1L1	ENCFF105YIV	K562	9967	24.1	8.72	36.54	46.11	7.47	38.64
MIER1	ENCFF465EPI	K562	7474	9.45	9.99	9.02	22.83	10.7	12.12
FOXK2	ENCFF022HGL	K562	18831	42.44	45.31	40.12	40.34	19.28	21.07
KAT2B	ENCFF349VSP	K562	755	2.73	1.48	3.74	62.65	15.1	47.55
L3MBTL2	ENCFF979SYP	K562	48050	66.4	63.27	68.93	27.95	11.83	16.13
WHSC1	ENCFF862UUR	K562	1611	0.94	1.18	0.75	10.43	5.83	4.59
ZNF274	ENCFF310RHC	K562	1569	2.64	4.87	0.83	31.87	26.58	5.29
HCFC1	ENCFF709HJC	K562	12800	40.19	22.22	54.71	53.31	13.14	40.17
ZNF282	ENCFF311JJC	K562	7971	23.84	25.02	22.89	55.85	25.88	29.97
NR2C2	ENCFF257INF	K562	37141	57.24	51.91	61.56	33.74	13.51	20.24
SOX6	ENCFF060HPS	K562	29116	58.78	72.23	47.91	35.55	19.36	16.2
MTA2	ENCFF653TKM	K562	16736	38.57	50.32	29.08	41.83	24.49	17.34
NFE2L1	ENCFF700WYH	K562	5050	5.54	10.53	1.51	18.24	15.49	2.75
ZNF318	ENCFF384XCG	K562	976	1.55	3.09	0.31	28.69	25.72	2.97
NCOA1	ENCFF533XKB	K562	954	1.64	2.33	1.09	28.83	18.34	10.48
ZNF830	ENCFF208OCT	K562	2807	5.15	3.73	6.3	32.38	10.76	21.62
BCOR	ENCFF746QQX	K562	36018	35.19	41.76	29.89	17.22	9.1	8.12
ZZZ3	ENCFF251IFL	K562	2309	6.97	2.74	10.38	54.35	9.44	44.91
SUPT5H	ENCFF612PGJ	K562	30734	50.56	26.98	69.62	31.23	7.25	23.98
POLR2H	ENCFF874GIH	K562	23495	41.02	29.28	50.52	35.71	11.17	24.55
GTF2A2	ENCFF632HFK	K562	5413	10.67	10.11	11.12	36.84	15.85	20.99
ZNF354B	ENCFF752WAG	K562	2627	6.88	11.12	3.44	43.43	31.37	12.07
NRF1	ENCFF259YUE	K562	21809	39.98	25.57	51.62	32.27	9.16	23.11
NCOA2	ENCFF922TVQ	K562	2140	7.15	13.04	2.39	56.73	46.5	10.23
PYGO2	ENCFF411YDN	K562	2215	4.44	6.16	3.06	35.17	21.72	13.45
PRPF4	ENCFF886UMM	K562	7197	18.62	6.08	28.75	48.44	7.06	41.38
ARNT	ENCFF665JOT	K562	3582	14.07	22.2	7.5	68.51	48.24	20.27
U2AF2	ENCFF164CTH	K562	148	0	0	0	0	0	0
ADNP	ENCFF083UZC	K562	21479	12.58	21.26	5.57	11.85	8.95	2.9
DDX20	ENCFF193UWO	K562	9072	27.71	30.62	25.35	55.04	27.08	27.95
PBX2	ENCFF345BUG	K562	32960	29.17	44.74	16.58	15.39	10.62	4.77
CUX1	ENCFF093TYI	K562	6591	13.29	21.54	6.61	37.02	26.79	10.23
ZFX	ENCFF243WYZ	K562	26817	42.28	27.66	54.1	30.14	8.64	21.5
GMEB1	ENCFF485HQE	K562	9889	34.62	22.3	44.57	59.56	17.12	42.44
HES1	ENCFF991IRG	K562	8461	23.95	36.14	14.09	49.12	33.05	16.07
ZBTB5	ENCFF136YRI	K562	2411	5.31	6.27	4.53	37.2	19.49	17.71
CHAMP1	ENCFF626FDW	K562	4161	6.63	8.79	4.89	27.04	16.08	10.96
MBD2	ENCFF271DMO	K562	12160	44.21	38.54	48.78	64.47	24.51	39.96
HDGF	ENCFF166CUH	K562	9810	13.54	14.88	12.46	25.05	12.41	12.64
MYBL2	ENCFF410VRF	K562	3997	9.62	8.72	10.34	41.58	16.66	24.92
TAL1	ENCFF665HHH	K562	23329	31	52.8	13.39	22.67	17.2	5.47
ZNF24	ENCFF550KLZ	K562	25708	34.11	46.34	24.22	23.73	14.45	9.27
SAFB2	ENCFF352KMZ	K562	57	0.04	0	0.07	10.53	0	10.53
DIDO1	ENCFF242OGD	K562	6416	22.9	17.07	27.62	62.34	20.59	41.75
NFATC3	ENCFF749NJH	K562	10386	27.53	34.66	21.77	48.13	27.16	20.97
CREB3	ENCFF950IYB	K562	10705	22.67	30	16.74	38.68	22.77	15.92
SRSF7	ENCFF217MBF	K562	256	0.47	0.16	0.71	31.64	5.47	26.17
KLF13	ENCFF215UUL	K562	8026	27.1	20.72	32.26	58.29	19.64	38.65
ZNF644	ENCFF322BWV	K562	12247	29.1	40.43	19.95	44.35	27.49	16.85
PTTG1	ENCFF298SAJ	K562	4308	6.7	11.94	2.47	26.86	21.49	5.36
RBM17	ENCFF874SPS	K562	33	0.05	0.04	0.07	27.27	9.09	18.18
RBM14	ENCFF450TEZ	K562	2292	5.17	2.01	7.72	40.75	7.02	33.73
CTBP1	ENCFF200APZ	K562	36949	64.7	67.87	62.13	33.47	15.53	17.94
ZNF395	ENCFF112CRP	K562	20992	43.56	49.18	39.02	40.22	20.31	19.91
IRF9	ENCFF042ROQ	K562	7206	13.81	21.92	7.26	32.47	23.04	9.44
HINFP	ENCFF826QOG	K562	6438	12.78	16.51	9.76	33.18	19.26	13.92
RBM34	ENCFF990RDF	K562	980	2.9	0.85	4.55	53.06	6.63	46.43
ZKSCAN8	ENCFF646MDN	K562	8311	16.15	27.96	6.61	37.75	29.19	8.55
IKZF1	ENCFF847SXQ	K562	44567	45.95	58.76	35.59	19.03	10.89	8.14
NR2F1	ENCFF737YKD	K562	34925	41.99	55.85	30.78	22.23	13.24	9
RBM15	ENCFF454XIV	K562	273	0.87	0.31	1.32	57.88	8.79	49.08
PRMT5	ENCFF915YYM	K562	1596	2.55	0.92	3.87	26.88	4.26	22.62
ZEB2	ENCFF225SIS	K562	23804	39.25	53.47	27.76	29.98	18.35	11.63
EP400	ENCFF294MTS	K562	32871	69.01	64.56	72.61	42.65	17.43	25.23
KDM1A	ENCFF100CTO	K562	29859	26.77	46.81	10.57	15.87	12.38	3.48
NONO	ENCFF211WVT	K562	5551	13.59	4.19	21.18	44.33	6.2	38.14
PCBP2	ENCFF811WMX	K562	2006	1.11	0.53	1.58	10.27	2.24	8.03
CEBPB	ENCFF761UZG	K562	53072	21.82	30.55	14.76	7.73	4.87	2.86
SKIL	ENCFF480QGO	K562	17697	45.35	41.95	48.09	50.25	20.77	29.49
TEAD2	ENCFF510OCF	K562	4345	10.02	16.67	4.65	38.57	28.65	9.92
TAF7	ENCFF010YHS	K562	10474	30.54	18.91	39.93	49.73	13.8	35.94
IRF1	ENCFF019LOH	K562	11095	10.5	15.09	6.79	19.12	12.49	6.62
NR4A1	ENCFF989AIL	K562	4284	14.41	13.25	15.35	57.1	23.48	33.61
TSC22D4	ENCFF901RLA	K562	1350	0.52	0.96	0.15	6.37	5.26	1.11
ZNF740	ENCFF750FWJ	K562	4608	5.52	9.46	2.34	23.63	18.32	5.32
MAFG	ENCFF493DXA	K562	41850	20.08	34.84	8.16	8.27	6.41	1.86
RBM25	ENCFF216VGS	K562	50215	16.12	10.42	20.73	5.5	1.59	3.91
E2F5	ENCFF082QHP	K562	19521	43.41	50.64	37.55	41.87	21.81	20.07
ILK	ENCFF821CMU	K562	1211	3.28	6.39	0.77	44.84	38.98	5.86
CEBPG	ENCFF936UGT	K562	40039	16.52	21.48	12.52	7.52	4.41	3.11
KLF1	ENCFF583PGH	K562	8404	25.34	18.6	30.78	55.05	17.82	37.22
TFDP1	ENCFF701EYT	K562	18632	37.83	34.49	40.54	42.12	16.7	25.42
RELA	ENCFF687VTH	K562	6145	12.44	17.69	8.2	37.95	24.21	13.73
PKNOX1	ENCFF319QDN	K562	44927	46.34	53.6	40.47	18.38	9.63	8.75
ZBTB11	ENCFF920TXI	K562	3840	11.72	4.25	17.75	52.16	8.36	43.8
LEF1	ENCFF964DHU	K562	2780	9.1	8.42	9.64	56.37	23.38	32.99
ID3	ENCFF299SLF	K562	891	2.4	4.29	0.88	44.67	35.69	8.98
ZNF175	ENCFF981BRI	K562	18651	34.26	45.77	24.96	35.09	21.08	14
ETV1	ENCFF065RZP	K562	22149	48.73	50.44	47.35	37.77	17.4	20.37
ZNF83	ENCFF009CYN	K562	9892	23	30.36	17.05	43.47	25.65	17.82
HDAC8	ENCFF711GFV	K562	6320	17.03	17.08	17	48.67	21.91	26.76
GTF2E2	ENCFF072XQJ	K562	12453	27.95	19.29	34.95	45.35	13.6	31.75
VEZF1	ENCFF479WKB	K562	42135	63.74	63.33	64.08	29.44	12.7	16.74
ZNF148	ENCFF411HIX	K562	22855	33.27	36.02	31.04	27.76	13.28	14.48
CDC5L	ENCFF680NJD	K562	4633	9.38	8.83	9.82	35.05	14.76	20.29
MEF2D	ENCFF242ULW	K562	12757	27.7	42.27	15.92	39.06	26.65	12.41
ELF1	ENCFF472XVC	K562	13731	32.48	22.36	40.66	44.45	13.65	30.81
ZNF589	ENCFF704LLO	K562	20605	38.12	50.31	28.28	35.39	21	14.39
TRIM24	ENCFF864JGI	K562	15138	29.16	49.15	13	33.02	24.78	8.24
FOSL1	ENCFF256NXT	K562	59606	51.91	67.22	39.53	18.35	10.88	7.47
ZNF766	ENCFF466PKS	K562	26960	44.72	56.42	35.25	31.11	17.6	13.51
TCF12	ENCFF970YIG	K562	23787	30.41	53.24	11.96	21.83	17.04	4.79
SRSF3	ENCFF959YOR	K562	1784	4.02	1.63	5.95	41.09	7.34	33.74
THRA	ENCFF174DRC	K562	1345	1.63	2.51	0.91	21.19	14.57	6.62
XRCC3	ENCFF577FBP	K562	977	0.49	0.77	0.25	8.7	6.35	2.35
NKRF	ENCFF097NRE	K562	14513	31.07	17.31	42.19	39.6	9.72	29.88
C11orf30	ENCFF640MQS	K562	49449	37.97	33.33	41.72	13.73	5.25	8.48
ZMYM3	ENCFF700JAQ	K562	34545	6.26	8.67	4.32	3.1	1.91	1.18
BRD4	ENCFF632ZRY	K562	7897	18.75	13.35	23.11	44.33	13.93	30.4
THRAP3	ENCFF147MOG	K562	4235	6.07	6.44	5.77	25.15	12.02	13.13
COPS2	ENCFF942JZR	K562	30	0.04	0.03	0.05	23.33	6.67	16.67
FOXM1	ENCFF262OXZ	K562	13563	34.12	45.64	24.8	44.19	26.27	17.92
E2F1	ENCFF576KKB	K562	21742	43.68	38.73	47.69	37.55	14.7	22.86
KDM4B	ENCFF795KCQ	K562	131	0.16	0.27	0.08	21.37	16.03	5.34
ETS2	ENCFF493PSP	K562	846	2.7	3.27	2.25	55.67	30.26	25.41
ARID1B	ENCFF967XTM	K562	50073	54.88	75.27	38.41	20.18	12.43	7.75
EWSR1	ENCFF255KNF	K562	939	0.6	0.95	0.32	11.4	8.09	3.3
RFX1	ENCFF678NAO	K562	16658	9.39	8.72	9.92	9.56	4.02	5.54
NR2C1	ENCFF151VRY	K562	22901	44.12	49.84	39.5	33.54	16.96	16.57
TRIM28	ENCFF382UDO	K562	12054	19.43	22.98	16.56	28.97	15.33	13.64
CC2D1A	ENCFF782WMI	K562	18199	31.46	39.13	25.26	30.98	17.08	13.9
SMARCA5	ENCFF365CXF	K562	13064	10.68	13.46	8.43	14.57	8.27	6.3
MCM7	ENCFF168OIP	K562	1165	2.66	3.43	2.04	39.06	22.49	16.57
ZC3H8	ENCFF039UIB	K562	1726	5.18	5.79	4.69	51.68	25.78	25.9
HNRNPK	ENCFF505RNR	K562	12296	12.3	4.56	18.55	17.96	2.94	15.01
SIN3B	ENCFF040MIA	K562	8469	25.9	7.73	40.58	53.73	7.12	46.61
ELK1	ENCFF490IWP	K562	3581	14.35	6.72	20.52	69.14	14.47	54.68
KAT8	ENCFF488QFU	K562	1225	3.32	1.76	4.58	47.18	11.1	36.08
GABPB1	ENCFF764HIS	K562	30922	56.24	45.01	65.31	34.12	12.12	22
ZBED1	ENCFF736FYR	K562	5153	19.37	18.83	19.81	66.04	28.27	37.76
MAFF	ENCFF939WDM	K562	22919	13.5	22.33	6.36	9.8	7.23	2.57
PML	ENCFF989RWS	K562	16698	49.96	48.43	51.2	54.7	23	31.7
MITF	ENCFF224AGU	K562	28442	21.15	26.05	17.19	12.91	7.06	5.85
JUN	ENCFF498BRE	K562	18230	38.42	44.89	33.19	35.61	18.46	17.14
YBX3	ENCFF351GRZ	K562	1348	3.52	1.93	4.81	45.47	10.83	34.64
MCM3	ENCFF384CRI	K562	1682	0.65	1	0.37	6.42	4.4	2.02
ZBTB8A	ENCFF335GXH	K562	441	1.13	1.49	0.84	43.31	25.62	17.69
NR3C1	ENCFF668CQX	K562	2181	4.94	4.37	5.39	39.61	15.59	24.03
HMBOX1	ENCFF546SCS	K562	24339	22.53	36.96	10.88	17.13	12.64	4.49
CSDE1	ENCFF493UXW	K562	4302	11.47	7.58	14.62	47.33	13.97	33.36
GATAD2B	ENCFF270LDV	K562	11940	27.51	32.17	23.74	40.58	21.14	19.44
ZNF592	ENCFF520ESS	K562	36190	47.72	60.85	37.12	25.63	15.04	10.6
POLR2G	ENCFF407HBE	K562	57266	53.24	28.83	72.97	18.77	4.36	14.41
SNRNP70	ENCFF306TAD	K562	807	0.96	0.83	1.07	20.94	8.18	12.76
SFPQ	ENCFF995MDH	K562	200	0.29	0.22	0.34	29	10.5	18.5
TRIP13	ENCFF558MHP	K562	1116	2.4	2.6	2.24	37.63	18.73	18.91
SRSF1	ENCFF475SHO	K562	1263	4.27	1.48	6.52	60.57	9.58	50.99
HNRNPLL	ENCFF813BQH	K562	14799	34.61	15.71	49.88	44.19	8.76	35.43
ZNF7	ENCFF540RON	K562	11943	28.89	24.83	32.17	42.9	16.29	26.61
EHMT2	ENCFF373EMV	K562	14849	20.7	31.94	11.62	23.97	16.53	7.43
MCM2	ENCFF869KPH	K562	2586	1.66	2.16	1.26	10.98	6.38	4.6
NCOA4	ENCFF096ZZW	K562	1522	4.48	6.34	2.97	49.15	30.88	18.27
ZSCAN29	ENCFF002RGT	K562	3954	8.96	7.15	10.42	39.61	14.11	25.49
MGA	ENCFF062GLG	K562	32984	40.16	38.22	41.73	23.32	9.95	13.37
NFRKB	ENCFF568ETE	K562	6643	22.18	11.79	30.58	61.81	14.66	47.15
TEAD4	ENCFF879AWG	K562	29730	48.17	65.55	34.11	27.94	16.89	11.05
ZNF507	ENCFF071ODA	K562	5273	15.55	21.07	11.1	48.91	29.64	19.27
SAP30	ENCFF399MUG	K562	8781	19.7	5.92	30.83	42.27	5.48	36.8
ZNF143	ENCFF183ZAO	K562	23591	25.72	18.25	31.77	18.18	5.76	12.42
NFIC	ENCFF165MBH	K562	50000	56.73	62.52	52.05	19.83	9.66	10.17
ZNF316	ENCFF907ICG	K562	15772	6.69	7.9	5.72	7.56	4.02	3.54
FOXA1	ENCFF467JQY	K562	852	1.43	2.63	0.45	27.82	23	4.81
ZNF407	ENCFF999BWT	K562	3071	7.2	3.32	10.33	40.67	8.53	32.14
BMI1	ENCFF023GES	K562	2477	4	2.56	5.16	27.29	7.87	19.42
KLF16	ENCFF468NWV	K562	15694	30.06	45.57	17.53	32.52	21.94	10.58
NUFIP1	ENCFF130GVU	K562	2383	9.38	11.52	7.65	67.31	37.1	30.21
ZNF384	ENCFF304DSH	K562	20495	20.2	22.74	18.15	16.7	8.37	8.32
TBL1XR1	ENCFF828OVH	K562	5191	19.2	21.79	17.11	64.3	32.11	32.19
MXI1	ENCFF091WVG	K562	8360	26.72	18.9	33.05	54.71	17.24	37.48
KHSRP	ENCFF973UWZ	K562	3636	13.3	17.11	10.22	62.73	35.95	26.79
EGR1	ENCFF640AKG	K562	28066	45.7	39.95	50.34	29.47	11.31	18.17
STAT5A	ENCFF784XFN	K562	9793	22.45	41.35	7.17	39.02	31.98	7.04
NR2F2	ENCFF657ZBH	K562	15932	34.45	49.76	22.07	38.22	24.38	13.85
ILF3	ENCFF965MIZ	K562	2057	5.82	6.73	5.08	49.59	25.77	23.82
GABPA	ENCFF889XXJ	K562	33566	54.53	44.31	62.8	34.54	12.01	22.53
ZFP91	ENCFF110DOA	K562	12536	16.84	12.29	20.52	23.91	7.79	16.11
CCAR2	ENCFF757ZBP	K562	440	1.54	1.85	1.29	61.36	33.41	27.95
BDP1	ENCFF496QIZ	K562	350	1.02	1.74	0.45	48.57	36.86	11.71
DACH1	ENCFF742IRF	K562	16130	23.73	31.96	17.08	25.31	15.2	10.11
ZNF512	ENCFF415LUE	K562	22127	2.11	2.69	1.64	1.78	1.03	0.75
E2F7	ENCFF660HWD	K562	2451	9.36	8.87	9.75	64.63	27.34	37.29
RBM39	ENCFF983LFS	K562	3183	7.9	6.31	9.18	44.83	16.15	28.68
ZNF785	ENCFF320UIQ	K562	559	1.45	2.62	0.5	44.01	35.6	8.41
ZNF695	ENCFF909WQY	K562	1556	5.05	5.49	4.68	54.31	26.35	27.96
ZNF133	ENCFF112ONV	K562	1262	4.23	5.16	3.49	55.71	30.27	25.44
ZNF134	ENCFF169AWH	K562	6624	14.12	18.61	10.48	36.41	21.32	15.1
ZNF257	ENCFF812VWC	K562	3844	11.14	17.42	6.06	48.18	33.71	14.46
ZNF174	ENCFF384APY	K562	926	3.5	4.83	2.43	63.61	38.98	24.62
ESRRB	ENCFF249VVJ	K562	765	2.52	3.34	1.86	55.95	33.07	22.88
NBN	ENCFF779XHR	K562	16035	46.31	54.99	39.3	52.61	28.03	24.58
ZNF41	ENCFF629EAD	K562	4845	14.85	19.71	10.92	51.06	30.26	20.8
ZHX1	ENCFF175YPM	K562	3364	12.2	7.11	16.32	63.76	16.53	47.24
BCL6	ENCFF640MUM	K562	2575	8.85	13.43	5.14	57.2	38.87	18.33
ZNF212	ENCFF693GCE	K562	2250	8.45	9.08	7.95	63.56	30.44	33.11
DPF2	ENCFF917LAX	K562	16181	33.87	55.47	16.4	39.03	28.71	10.32
ZNF584	ENCFF260DCR	K562	13773	26.14	37.73	16.77	36.8	23.98	12.81
ZNF23	ENCFF864OJG	K562	2003	5.78	8.51	3.57	48.28	31.75	16.53
ZBTB9	ENCFF939MFW	K562	13952	36.08	36.17	36.01	46.3	20.63	25.67
NFIX	ENCFF691GZZ	K562	5528	3.98	5.93	2.41	11.98	8	3.98
ZNF583	ENCFF977POQ	K562	8372	24.02	28.77	20.18	49.73	26.68	23.04
ZNF397	ENCFF167SUN	K562	2558	8.62	9.27	8.1	56.02	26.78	29.24
POLR2B	ENCFF935YOF	K562	19758	43.49	22.14	60.75	40.46	9.19	31.27
ZFP1	ENCFF545DWS	K562	3391	6.77	8.95	5	33.29	19.73	13.57
TBPL1	ENCFF521IEC	K562	5139	21.14	10.83	29.48	73.63	16.66	56.98
MLX	ENCFF171ZNN	K562	1895	6.26	4.37	7.79	55.78	17.41	38.36
E4F1	ENCFF922WJY	K562	32446	64.36	66.42	62.69	39.91	18.18	21.73
ELF4	ENCFF892YGZ	K562	17897	42.35	33.98	49.11	43.43	15.4	28.03
NEUROD1	ENCFF233CTX	K562	11224	41.01	41	41.02	62.79	27.74	35.05
SMAD1	ENCFF980CWC	K562	8141	29.69	26.69	32.13	64.45	25.44	39.01
MEF2A	ENCFF288TSN	K562	4995	12.25	18.41	7.27	40.48	27.17	13.31
IRF2	ENCFF326LKJ	K562	7470	20.3	14.57	24.93	47.28	14.98	32.3
ASH1L	ENCFF491RRP	K562	3990	10.11	6.15	13.32	44.41	12.26	32.16
BRD9	ENCFF226VFC	K562	13850	31.81	39.21	25.82	42.3	23.54	18.77
PHB2	ENCFF674BWC	K562	4947	14.26	24.66	5.84	49.14	37.94	11.2
ZNF696	ENCFF899BJR	K562	866	2.67	4.22	1.41	51.96	36.14	15.82
ZNF436	ENCFF675MXQ	K562	2544	4.92	4.03	5.64	32.11	11.75	20.36
ZNF700	ENCFF556EJM	K562	2160	5.37	8.74	2.65	42.13	30.6	11.53
ZNF239	ENCFF740DGD	K562	6358	17.1	24.68	10.98	45.94	29.58	16.36
ZKSCAN3	ENCFF490SXY	K562	952	2.13	3.81	0.78	37.71	30.15	7.56
ZNF311	ENCFF056TME	K562	7181	14.91	22.9	8.45	35.77	24.62	11.15
HOMEZ	ENCFF450BHA	K562	2021	6.8	7.83	5.98	57.25	29.34	27.91
ZNF561	ENCFF701RWL	K562	1612	4.77	6.29	3.53	49.19	29.03	20.16
ELK3	ENCFF855WRB	K562	1137	4.04	6.05	2.41	60.07	40.02	20.05
ZNF76	ENCFF609GNZ	K562	4895	15.81	16.35	15.38	56.3	25.86	30.44
SMC3	ENCFF289LLT	K562	26679	16.75	15.44	17.81	10.56	4.33	6.23
BHLHE40	ENCFF242BDT	K562	25495	48.84	49.91	47.97	32.45	14.78	17.67
SAFB	ENCFF969HXX	K562	4128	9.05	3.23	13.76	38.64	6.1	32.53
MLLT1	ENCFF142LJC	K562	22763	36.58	39.75	34.02	28.38	13.69	14.69
TCF7	ENCFF401GJM	K562	5137	17.84	17.32	18.26	60.66	26.1	34.55
SRSF9	ENCFF130VOL	K562	21	0	0	0	0	0	0
U2AF1	ENCFF752DQV	K562	4547	12.54	4.61	18.95	50.36	8.34	42.03
PCBP1	ENCFF103HVZ	K562	10406	18.74	6.77	28.42	33.37	5.34	28.03
CBX1	ENCFF622IAZ	K562	10190	26.57	15.78	35.3	47.58	12.51	35.06
ZNF280A	ENCFF184TZK	K562	4577	1.14	1.61	0.76	4.28	2.69	1.59
ZNF197	ENCFF630SDN	K562	9969	25.7	33.27	19.59	47.68	27.72	19.96
SNAPC5	ENCFF175KBK	K562	622	1.64	3.01	0.53	43.41	35.69	7.72
DEAF1	ENCFF724GUU	K562	17012	14.95	18.1	12.41	15.04	8.15	6.9
SPI1	ENCFF185DGL	K562	24139	22.9	22.49	23.22	15.73	6.9	8.82
ZBTB40	ENCFF451QWS	K562	13822	20.75	33.86	10.15	27.8	20.12	7.68
NCOA6	ENCFF700PEK	K562	3853	9.3	8.3	10.1	42.33	16.77	25.56
NR0B1	ENCFF931LUC	K562	138	0.05	0.08	0.03	7.25	5.07	2.17
PTRF	ENCFF011CUC	K562	3893	6.26	11.12	2.32	27.2	21.65	5.55
SMARCC2	ENCFF669FKJ	K562	11671	27.35	47.06	11.41	43.92	33.88	10.04
HLTF	ENCFF992VUZ	K562	9027	20.99	22.78	19.54	40.58	19.73	20.85
MCM5	ENCFF949IHL	K562	721	0.26	0.42	0.13	6.1	4.44	1.66
SMAD4	ENCFF232ZHD	K562	36134	66.26	75.85	58.51	33.84	17.27	16.57
PHF20	ENCFF304KDK	K562	12863	34.19	16.88	48.18	47.93	10.39	37.53
TAF9B	ENCFF585DTZ	K562	14790	42.85	37.34	47.3	53.81	20.32	33.48
PRDM10	ENCFF141RMX	K562	27913	37.11	35.57	38.36	23.27	9.93	13.33
HNRNPUL1	ENCFF154RXQ	K562	970	1.81	2.16	1.52	34.12	18.04	16.08
RB1	ENCFF805SGG	K562	21824	45.36	27.58	59.73	36.91	9.78	27.13
MTA3	ENCFF553ZOP	K562	19738	55.92	55.13	56.55	53.94	23.59	30.34
TAF15	ENCFF337IVP	K562	612	1.05	0.75	1.29	32.03	9.97	22.06
AGO1	ENCFF132NIO	K562	11187	12.93	5.54	18.91	21.95	4.21	17.73
PTBP1	ENCFF529WFW	K562	4823	8.86	7.94	9.61	32.95	12.98	19.97
NFXL1	ENCFF929ILB	K562	3922	3.29	4.06	2.68	14.56	8.21	6.35
DNMT1	ENCFF981HQX	K562	2025	5.29	5.22	5.34	45.14	19.95	25.19
RBM22	ENCFF038UZU	K562	9758	15.5	6.62	22.68	28.9	5.49	23.41
SMAD3	ENCFF718DSJ	K562	7612	25.62	32.84	19.78	56.15	32.21	23.94
ARID3B	ENCFF176HTS	K562	2305	7.03	6.21	7.7	51.24	20.04	31.19
RREB1	ENCFF256PHY	K562	8300	22.85	21.42	24	47.65	19.98	27.67
RBFOX2	ENCFF059MVL	K562	55578	60.75	40.82	76.85	23.18	6.7	16.48
ZNF84	ENCFF932JTA	K562	4598	13.41	9.13	16.88	48.83	14.83	33.99
CLOCK	ENCFF475CFL	K562	1542	6.04	8.21	4.29	65.95	40.14	25.81
HIVEP1	ENCFF600WUA	K562	4284	14.32	16.4	12.64	55.56	28.45	27.1
ZSCAN32	ENCFF209PYR	K562	4335	10.61	12.07	9.43	40.74	20.69	20.05
E2F3	ENCFF089YJA	K562	8100	25.7	18.63	31.41	54.44	17.43	37.01
ZNF778	ENCFF962XYU	K562	262	0.38	0.66	0.14	23.66	18.7	4.96
ZNF319	ENCFF189IHZ	K562	6900	8.02	8.23	7.84	19.96	9.13	10.83
RLF	ENCFF910PKV	K562	7439	21.26	17.69	24.14	50.84	18.99	31.85
TBX18	ENCFF658MZJ	K562	5551	17.42	20.68	14.78	54.21	28.79	25.42
TFCP2	ENCFF418GMJ	K562	8563	22.97	18.94	26.23	45.95	16.82	29.14
PATZ1	ENCFF241TKU	K562	1955	6.4	7.79	5.29	55.75	30.18	25.58
ZNF281	ENCFF988FSI	K562	40212	56.67	75.17	41.71	25.26	14.98	10.29
ZNF444	ENCFF497BNQ	K562	2787	8.93	12.33	6.17	53.96	33.23	20.74
ZNF764	ENCFF085GIU	K562	2831	6.97	6.44	7.4	41.65	17.24	24.41
FOXA3	ENCFF504WWL	K562	11058	13.95	23.25	6.44	21.41	15.94	5.46
KLF10	ENCFF240MLU	K562	970	2.64	3.87	1.64	45.88	29.9	15.98
TEAD1	ENCFF675VKN	K562	12320	34.19	45.75	24.85	46.73	27.96	18.77
ZNF445	ENCFF406PZO	K562	2754	7.68	10.6	5.33	47.49	29.16	18.34
HMG20A	ENCFF118ATD	K562	1297	3.85	6.2	1.95	49.88	35.85	14.03
ERF	ENCFF060BDL	K562	9735	27.23	23.8	30.01	48.45	18.81	29.65
ZNF324	ENCFF359UUX	K562	5529	8.88	11.25	6.97	27.36	15.5	11.86
DLX4	ENCFF669VZL	K562	400	0.92	1.49	0.45	38.5	27.75	10.75
ZNF77	ENCFF203AXI	K562	687	1.81	1.95	1.69	45.41	21.69	23.73
SMAD2	ENCFF360SUP	K562	90	0.24	0.16	0.3	43.33	13.33	30
PHF21A	ENCFF663JIA	K562	4723	14.06	13.82	14.25	50.56	22.08	28.48
CBFA2T2	ENCFF543GET	K562	29740	33.68	53.79	17.42	19.04	13.58	5.46
GATAD2A	ENCFF863NVQ	K562	11614	31.91	39.9	25.46	47.64	26.65	20.99
CBFA2T3	ENCFF463SEV	K562	48763	42.31	64.1	24.69	14.83	9.98	4.85
HNRNPL	ENCFF423RKR	K562	7564	16.14	10.09	21.03	38.93	11.04	27.9
FUS	ENCFF581MLB	K562	2900	8.49	3.13	12.82	52.41	8.55	43.86
ZBTB2	ENCFF264HLZ	K562	13666	36.5	37.54	35.67	48.09	22.31	25.78
HDAC3	ENCFF051DMP	K562	6489	20.6	33.35	10.3	56.5	40.82	15.67
FOXJ2	ENCFF812WVH	K562	14813	26.88	29.87	24.46	34.08	16.97	17.11
LARP7	ENCFF296KCF	K562	6404	11.21	10.66	11.64	30.04	12.8	17.24
HNRNPH1	ENCFF797TVO	K562	330	0.66	0.46	0.82	35.15	11.52	23.64
POLR2AphosphoS5	ENCFF493NUB	K562	25309	60.97	55.03	65.78	42.85	16.78	26.07
ARID2	ENCFF879ZMI	K562	9032	8.9	10.34	7.73	16.75	8.64	8.12
ARHGAP35	ENCFF050CYN	K562	3005	5.27	4.84	5.61	29.18	12.08	17.1
STAT5B	ENCFF043KIK	K562	555	1.77	3.38	0.47	52.97	45.23	7.75
KLF6	ENCFF723JNI	K562	4608	15.69	18.61	13.32	57.47	30.45	27.02
ZBTB17	ENCFF157HXO	K562	14919	37.03	36.79	37.21	44.68	19.74	24.94
ZNF57	ENCFF660CFZ	K562	2008	6.6	7.23	6.09	54.78	26.69	28.09
ZNF253	ENCFF019NGO	K562	1083	3.03	3.76	2.43	47.28	26.04	21.24
ZNF215	ENCFF608NSF	K562	7190	13.72	20.65	8.11	32.71	22.07	10.64
ZNF586	ENCFF887ZDT	K562	1621	5	6.63	3.68	52.07	30.78	21.28
DDIT3	ENCFF989RVM	K562	3784	8.25	10.64	6.32	37.32	21.43	15.88
ZNF408	ENCFF094YKM	K562	577	0.52	0.46	0.56	15.08	5.89	9.19
TFE3	ENCFF688ZWT	K562	22420	11.81	12.79	11.01	8.81	4.27	4.55
HEY1	ENCFF699LCB	K562	2144	7.51	11.53	4.25	58.44	40.07	18.38
TCFL5	ENCFF410SWS	K562	1980	7.12	11.53	3.55	60	43.43	16.57
ZNF79	ENCFF535ONJ	K562	3325	8.62	13.09	5.01	43.79	29.68	14.11
TSHZ1	ENCFF390TCN	K562	2533	7.31	11.27	4.11	48.16	33.16	15
CREB5	ENCFF141CCK	K562	1920	5.7	8.38	3.53	50.89	33.33	17.55
EP300	ENCFF899RKF	K562	23218	51.43	69.31	36.97	37.18	22.27	14.92
ZNF3	ENCFF180XUM	K562	2429	5.15	3.92	6.15	37.71	12.97	24.74
ZNF146	ENCFF932FVX	K562	15263	2.26	1.47	2.91	2.65	0.73	1.91

## Sheet: Table S2. HOT loci
HepG2 HOT loci								K562 HOT loci								H1 HOT loci
chrom	start	stop	coverage	unique DAPs	DAPs			chrom	start	stop	coverage	unique DAPs	DAPs			chrom	start	stop	coverage	unique DAPs	DAPs
chr1	894400	894800	0.745	105	128			chr1	856400	856800	0.5625	63	78			chr1	1310400	1310800	0.2825	20	21
chr1	902000	902400	0.8025	86	84			chr1	894400	894800	0.6425	67	75			chr1	1342400	1342800	0.2475	15	17
chr1	936000	936400	0.9625	179	264			chr1	936000	936400	0.7725	107	151			chr1	1406800	1407200	0.2275	15	15
chr1	937200	937600	0.525	78	118			chr1	937200	937600	0.565	62	75			chr1	1447200	1447600	0.2675	16	16
chr1	940400	940800	0.56	67	82			chr1	940400	940800	0.8475	96	103			chr1	1510000	1510400	0.21	15	17
chr1	941600	942000	0.62	75	105			chr1	948400	948800	0.63	70	75			chr1	6259600	6260000	0.31	19	19
chr1	942000	942400	0.725	134	225			chr1	999600	1000000	0.64	62	63			chr1	6305200	6305600	0.24	16	15
chr1	948800	949200	0.7675	84	89			chr1	1045200	1045600	0.58	57	63			chr1	6614400	6614800	0.33	20	22
chr1	993600	994000	0.705	110	164			chr1	1051200	1051600	0.575	57	71			chr1	6761600	6762000	0.275	21	19
chr1	999600	1000000	0.7575	102	127			chr1	1051600	1052000	0.6625	69	67			chr1	8021600	8022000	0.225	15	15
chr1	1014800	1015200	0.6975	96	118			chr1	1167200	1167600	0.755	91	110			chr1	8933600	8934000	0.2925	18	17
chr1	1015200	1015600	0.7125	80	82			chr1	1209200	1209600	0.6525	69	59			chr1	9488800	9489200	0.2775	20	22
chr1	1051600	1052000	0.62	83	88			chr1	1243600	1244000	0.6325	62	68			chr1	10003200	10003600	0.2775	21	21
chr1	1057600	1058000	0.5825	68	84			chr1	1310400	1310800	0.815	119	167			chr1	10458800	10459200	0.2425	16	16
chr1	1060000	1060400	0.62	96	138			chr1	1310800	1311200	0.835	89	98			chr1	10490400	10490800	0.375	22	17
chr1	1060400	1060800	0.8175	85	97			chr1	1333600	1334000	0.49	54	56			chr1	10532400	10532800	0.3225	24	27
chr1	1064000	1064400	0.815	84	79			chr1	1334800	1335200	0.9125	109	114			chr1	11072400	11072800	0.3025	17	16
chr1	1167200	1167600	0.7325	122	172			chr1	1342400	1342800	0.6825	103	129			chr1	11322800	11323200	0.22	17	18
chr1	1173600	1174000	0.955	145	161			chr1	1358000	1358400	0.4575	53	58			chr1	11866000	11866400	0.22	16	16
chr1	1175200	1175600	0.725	77	79			chr1	1368400	1368800	0.44	45	56			chr1	15853200	15853600	0.31	17	18
chr1	1209200	1209600	0.7525	120	134			chr1	1368800	1369200	0.675	58	56			chr1	15930000	15930400	0.2475	16	16
chr1	1217200	1217600	0.815	99	93			chr1	1376400	1376800	0.595	51	57			chr1	16176000	16176400	0.2825	17	15
chr1	1222800	1223200	0.54	74	104			chr1	1406800	1407200	0.63	77	91			chr1	16302400	16302800	0.205	13	15
chr1	1243200	1243600	0.435	56	78			chr1	1447200	1447600	0.8225	108	125			chr1	16766800	16767200	0.2	14	15
chr1	1243600	1244000	0.6075	85	114			chr1	1510000	1510400	0.8	94	97			chr1	17380400	17380800	0.26	15	15
chr1	1260000	1260400	0.5725	76	81			chr1	1545200	1545600	0.35	58	86			chr1	17820800	17821200	0.2225	16	17
chr1	1260400	1260800	0.7625	84	84			chr1	1550400	1550800	0.545	51	61			chr1	18807200	18807600	0.205	18	18
chr1	1270400	1270800	0.2525	52	98			chr1	1550800	1551200	0.6525	68	75			chr1	19536800	19537200	0.32	19	21
chr1	1283200	1283600	0.785	84	88			chr1	1590400	1590800	0.7475	86	96			chr1	19578000	19578400	0.24	19	15
chr1	1294000	1294400	0.9075	117	105			chr1	1655600	1656000	0.745	100	120			chr1	19664800	19665200	0.2925	18	16
chr1	1295600	1296000	0.585	74	89			chr1	1690400	1690800	0.6725	77	83			chr1	20959600	20960000	0.22	17	17
chr1	1310400	1310800	0.6625	127	331			chr1	1710400	1710800	0.65	63	59			chr1	21985600	21986000	0.185	15	17
chr1	1310800	1311200	0.46	79	121			chr1	1790000	1790400	0.3625	54	63			chr1	22110000	22110400	0.24	16	16
chr1	1334800	1335200	0.975	168	185			chr1	1814800	1815200	0.38	56	71			chr1	23345600	23346000	0.305	23	24
chr1	1336000	1336400	0.4475	80	234			chr1	1822400	1822800	0.575	58	66			chr1	23882400	23882800	0.325	23	23
chr1	1336400	1336800	0.6625	88	157			chr1	1837600	1838000	0.4325	53	63			chr1	23924800	23925200	0.215	14	15
chr1	1342400	1342800	0.6875	143	264			chr1	1840800	1841200	0.765	73	73			chr1	24018000	24018400	0.2425	15	15
chr1	1356400	1356800	0.405	57	91			chr1	2107200	2107600	0.795	76	75			chr1	24306800	24307200	0.295	20	17
chr1	1366000	1366400	0.8125	91	85			chr1	2111600	2112000	0.5425	66	84			chr1	25174400	25174800	0.2475	17	16
chr1	1367200	1367600	0.8675	158	211			chr1	2126400	2126800	0.79	75	90			chr1	25236000	25236400	0.295	19	17
chr1	1368400	1368800	0.755	143	224			chr1	2130400	2130800	0.575	60	73			chr1	26232800	26233200	0.2525	16	17
chr1	1368800	1369200	0.7625	96	112			chr1	2136800	2137200	0.785	78	78			chr1	26324800	26325200	0.2	17	17
chr1	1370800	1371200	0.695	82	92			chr1	2144000	2144400	0.615	69	73			chr1	26496000	26496400	0.18	14	15
chr1	1373200	1373600	0.465	67	91			chr1	2158800	2159200	0.5925	53	57			chr1	26560400	26560800	0.2525	17	16
chr1	1376400	1376800	0.8325	129	149			chr1	2322800	2323200	0.7425	72	76			chr1	26758400	26758800	0.3525	22	22
chr1	1406800	1407200	0.67	101	148			chr1	2457600	2458000	0.555	74	98			chr1	27019600	27020000	0.3075	21	20
chr1	1447200	1447600	0.8575	156	214			chr1	2473200	2473600	0.825	88	88			chr1	27022000	27022400	0.2425	19	20
chr1	1510000	1510400	0.545	89	137			chr1	2478000	2478400	0.7425	63	60			chr1	27226800	27227200	0.245	18	17
chr1	1550800	1551200	0.915	143	203			chr1	2517200	2517600	0.5325	75	105			chr1	27286800	27287200	0.3125	23	22
chr1	1590400	1590800	0.6675	82	82			chr1	2574400	2574800	0.7525	71	78			chr1	27326000	27326400	0.2725	18	17
chr1	1610400	1610800	0.67	104	151			chr1	3229600	3230000	0.5875	55	57			chr1	27337600	27338000	0.225	15	15
chr1	1655600	1656000	0.57	83	117			chr1	3541200	3541600	0.5175	53	59			chr1	27339200	27339600	0.29	19	19
chr1	1710400	1710800	0.9075	134	142			chr1	3566400	3566800	0.6625	69	81			chr1	27372400	27372800	0.18	14	17
chr1	1837600	1838000	0.435	70	128			chr1	3691200	3691600	0.4175	52	78			chr1	27481600	27482000	0.27	17	15
chr1	1840400	1840800	0.545	90	102			chr1	3692400	3692800	0.665	78	111			chr1	27648400	27648800	0.235	20	20
chr1	1851200	1851600	0.6525	87	111			chr1	3712800	3713200	0.625	87	103			chr1	28052000	28052400	0.255	15	15
chr1	1852000	1852400	0.72	79	87			chr1	3773600	3774000	0.7	67	74			chr1	28261200	28261600	0.2475	17	17
chr1	1854400	1854800	0.7075	97	117			chr1	3816400	3816800	0.545	54	56			chr1	28559200	28559600	0.18	17	18
chr1	1872400	1872800	0.21	47	90			chr1	3816800	3817200	0.6925	68	77			chr1	28623200	28623600	0.2575	16	15
chr1	1872800	1873200	0.7675	115	140			chr1	3817200	3817600	0.765	87	89			chr1	28879200	28879600	0.225	16	17
chr1	1874400	1874800	0.9675	164	223			chr1	5946000	5946400	0.4575	70	123			chr1	28969600	28970000	0.2525	19	20
chr1	1875600	1876000	0.705	98	105			chr1	5977600	5978000	0.53	70	84			chr1	28974800	28975200	0.31	20	21
chr1	1891200	1891600	0.5325	86	115			chr1	5978000	5978400	0.67	72	79			chr1	29063200	29063600	0.3675	22	19
chr1	1891600	1892000	0.4875	68	89			chr1	6052400	6052800	0.77	73	67			chr1	29211600	29212000	0.17	15	17
chr1	1978000	1978400	0.3375	49	79			chr1	6259600	6260000	0.7725	99	108			chr1	29529200	29529600	0.205	13	15
chr1	1978800	1979200	0.7325	89	97			chr1	6265200	6265600	0.66	57	61			chr1	29557200	29557600	0.215	18	20
chr1	1980800	1981200	0.67	94	119			chr1	6296000	6296400	0.5975	54	61			chr1	31538400	31538800	0.2575	15	15
chr1	1981200	1981600	0.89	123	133			chr1	6305200	6305600	0.57	76	104			chr1	31769600	31770000	0.225	15	15
chr1	2036400	2036800	0.8475	106	115			chr1	6453600	6454000	0.6225	63	60			chr1	31867600	31868000	0.2	14	15
chr1	2066000	2066400	0.5875	96	138			chr1	6454000	6454400	0.7175	72	78			chr1	32110400	32110800	0.3275	20	17
chr1	2066400	2066800	0.7875	86	92			chr1	6614400	6614800	0.7575	99	116			chr1	32281600	32282000	0.2	17	16
chr1	2121200	2121600	0.8625	112	120			chr1	6661200	6661600	0.6975	67	69			chr1	32404000	32404400	0.28	17	16
chr1	2126400	2126800	0.81	102	132			chr1	6662800	6663200	0.5825	55	60			chr1	32410000	32410400	0.23	16	16
chr1	2139200	2139600	0.86	131	221			chr1	6664000	6664400	0.825	111	125			chr1	32645200	32645600	0.295	17	15
chr1	2139600	2140000	0.7825	95	106			chr1	6673600	6674000	0.7225	77	81			chr1	32860000	32860400	0.2525	17	16
chr1	2164000	2164400	0.6375	86	148			chr1	6761600	6762000	0.6775	82	93			chr1	33225600	33226000	0.22	15	17
chr1	2166000	2166400	0.78	128	179			chr1	6762000	6762400	0.72	81	99			chr1	33282800	33283200	0.2625	21	23
chr1	2182000	2182400	0.53	64	82			chr1	6844400	6844800	0.6175	56	60			chr1	33352000	33352400	0.185	17	19
chr1	2182400	2182800	0.54	79	99			chr1	6844800	6845200	0.7775	80	86			chr1	33592800	33593200	0.32	22	21
chr1	2322800	2323200	0.875	114	139			chr1	7887200	7887600	0.5325	73	98			chr1	35318400	35318800	0.33	21	19
chr1	2344000	2344400	0.715	83	93			chr1	8014000	8014400	0.845	97	104			chr1	35325200	35325600	0.2075	19	19
chr1	2344400	2344800	0.845	114	126			chr1	8014400	8014800	0.4625	46	57			chr1	35332000	35332400	0.2375	14	15
chr1	2345200	2345600	0.685	69	79			chr1	8021200	8021600	0.645	83	98			chr1	35497200	35497600	0.3375	18	16
chr1	2477600	2478000	0.4725	59	79			chr1	8021600	8022000	0.8725	99	107			chr1	35734000	35734400	0.2775	16	16
chr1	2487200	2487600	0.735	92	97			chr1	8064800	8065200	0.6125	87	95			chr1	36106800	36107200	0.2125	16	16
chr1	2507200	2507600	0.3375	68	113			chr1	8182800	8183200	0.675	73	98			chr1	36554400	36554800	0.2375	18	19
chr1	2509600	2510000	0.55	117	242			chr1	8183200	8183600	0.34	50	71			chr1	36615200	36615600	0.2175	16	17
chr1	2574400	2574800	0.88	108	119			chr1	8257600	8258000	0.67	79	98			chr1	36689600	36690000	0.235	14	15
chr1	3032000	3032400	0.4825	64	83			chr1	8258000	8258400	0.515	73	98			chr1	36852000	36852400	0.2325	19	19
chr1	3114400	3114800	0.605	78	91			chr1	8272000	8272400	0.545	56	64			chr1	36863200	36863600	0.23	15	17
chr1	3209600	3210000	0.4525	70	113			chr1	8586000	8586400	0.56	69	78			chr1	38019600	38020000	0.23	14	15
chr1	3237200	3237600	0.925	179	309			chr1	8602000	8602400	0.5625	67	89			chr1	38061200	38061600	0.2025	14	16
chr1	3239600	3240000	0.635	71	80			chr1	8686400	8686800	0.565	79	109			chr1	38156000	38156400	0.285	19	19
chr1	3243200	3243600	0.7325	111	153			chr1	8763200	8763600	0.5225	67	81			chr1	38455600	38456000	0.425	30	30
chr1	3251600	3252000	0.9175	135	159			chr1	8849200	8849600	0.335	60	82			chr1	38461600	38462000	0.27	17	16
chr1	3257200	3257600	0.8875	111	115			chr1	8849600	8850000	0.71	64	63			chr1	38478000	38478400	0.2475	16	17
chr1	3272400	3272800	0.495	63	84			chr1	8877600	8878000	0.7525	86	86			chr1	40167200	40167600	0.28	17	15
chr1	3340000	3340400	0.83	136	199			chr1	8918000	8918400	0.3575	46	60			chr1	40562800	40563200	0.1975	15	16
chr1	3369600	3370000	0.37	63	90			chr1	8933600	8934000	0.52	50	59			chr1	40626800	40627200	0.2375	18	19
chr1	3370800	3371200	0.595	82	109			chr1	8938000	8938400	0.89	127	123			chr1	40723600	40724000	0.3275	20	17
chr1	3373600	3374000	0.84	112	118			chr1	8938400	8938800	0.7275	79	78			chr1	40780800	40781200	0.2375	16	16
chr1	3388000	3388400	0.6725	107	143			chr1	8938800	8939200	0.8025	79	74			chr1	41157200	41157600	0.2625	16	16
chr1	3388400	3388800	0.705	118	159			chr1	8939200	8939600	0.72	72	74			chr1	41962000	41962400	0.2375	17	18
chr1	3541200	3541600	0.76	102	126			chr1	8940000	8940400	0.6175	57	64			chr1	42800800	42801200	0.22	18	18
chr1	3542000	3542400	0.845	101	112			chr1	9294400	9294800	0.6575	72	80			chr1	43124000	43124400	0.2625	18	19
chr1	3566400	3566800	0.7275	96	101			chr1	9488800	9489200	0.6325	74	95			chr1	43390000	43390400	0.3625	22	19
chr1	3585200	3585600	0.3525	76	135			chr1	9599200	9599600	0.7075	68	69			chr1	43474400	43474800	0.215	18	17
chr1	3650000	3650400	0.545	70	92			chr1	9687200	9687600	0.525	59	74			chr1	44412000	44412400	0.28	17	18
chr1	3688400	3688800	0.74	84	84			chr1	9717600	9718000	0.4825	54	64			chr1	44440400	44440800	0.1925	13	15
chr1	3692000	3692400	0.71	83	100			chr1	9747200	9747600	0.75	85	88			chr1	44678800	44679200	0.2475	22	25
chr1	3692400	3692800	0.92	166	232			chr1	9777200	9777600	0.6875	60	62			chr1	44820800	44821200	0.295	17	17
chr1	3712800	3713200	0.69	120	181			chr1	9777600	9778000	0.925	125	136			chr1	45008800	45009200	0.2075	13	15
chr1	3773600	3774000	0.6825	105	154			chr1	9779200	9779600	0.8125	97	107			chr1	45140000	45140400	0.2675	16	15
chr1	3774000	3774400	0.705	74	81			chr1	9835200	9835600	0.4775	53	72			chr1	45251600	45252000	0.1325	14	15
chr1	3816800	3817200	0.8275	108	117			chr1	9970800	9971200	0.72	70	71			chr1	45285600	45286000	0.2675	16	16
chr1	3817600	3818000	0.8775	98	100			chr1	9989600	9990000	0.6525	73	88			chr1	45452000	45452400	0.275	20	20
chr1	4327600	4328000	0.81	126	150			chr1	10003200	10003600	0.72	117	168			chr1	45477600	45478000	0.215	16	16
chr1	5993600	5994000	0.2925	49	82			chr1	10092400	10092800	0.55	52	60			chr1	45792400	45792800	0.2775	19	18
chr1	6015600	6016000	0.74	127	150			chr1	10092800	10093200	0.82	72	78			chr1	46016400	46016800	0.255	18	17
chr1	6052400	6052800	0.9525	119	111			chr1	10270400	10270800	0.7325	80	77			chr1	46216400	46216800	0.2325	14	15
chr1	6086000	6086400	0.5925	104	170			chr1	10458800	10459200	0.8725	103	114			chr1	46768800	46769200	0.2325	16	16
chr1	6112400	6112800	0.2125	44	88			chr1	10459200	10459600	0.675	56	59			chr1	46859600	46860000	0.1325	14	15
chr1	6221600	6222000	0.195	44	86			chr1	10475200	10475600	0.6525	61	63			chr1	47644800	47645200	0.38	25	22
chr1	6259200	6259600	0.4825	70	113			chr1	10475600	10476000	0.5825	75	80			chr1	51426000	51426400	0.2725	19	17
chr1	6259600	6260000	0.77	158	253			chr1	10490400	10490800	0.895	128	152			chr1	52344400	52344800	0.28	15	15
chr1	6266000	6266400	0.9475	161	190			chr1	10519200	10519600	0.565	62	67			chr1	52870000	52870400	0.2825	17	15
chr1	6305200	6305600	0.465	79	369			chr1	10532400	10532800	0.895	130	156			chr1	53704000	53704400	0.2025	17	19
chr1	6419600	6420000	0.6625	92	131			chr1	10534800	10535200	0.665	79	93			chr1	55181200	55181600	0.22	15	19
chr1	6453600	6454000	0.695	81	99			chr1	10570800	10571200	0.37	49	58			chr1	55487600	55488000	0.32	22	24
chr1	6505200	6505600	0.5925	72	82			chr1	10571200	10571600	0.69	76	75			chr1	59012400	59012800	0.2225	14	15
chr1	6507200	6507600	0.955	161	198			chr1	11072400	11072800	0.6775	87	97			chr1	59249600	59250000	0.2675	17	16
chr1	6508000	6508400	0.705	79	82			chr1	11072800	11073200	0.8575	86	77			chr1	62744800	62745200	0.185	13	15
chr1	6511200	6511600	0.5725	80	106			chr1	11120000	11120400	0.6125	51	58			chr1	63988800	63989200	0.395	24	18
chr1	6550400	6550800	0.72	86	99			chr1	11159600	11160000	0.775	78	79			chr1	64240800	64241200	0.24	15	15
chr1	6614400	6614800	0.7875	134	235			chr1	11322800	11323200	0.5475	63	75			chr1	65533200	65533600	0.2175	15	15
chr1	6639600	6640000	0.83	79	85			chr1	11333200	11333600	0.8375	119	121			chr1	65731200	65731600	0.2025	14	15
chr1	6642400	6642800	0.4425	72	144			chr1	11610800	11611200	0.4075	52	79			chr1	67896000	67896400	0.2425	14	16
chr1	6662800	6663200	0.7	87	92			chr1	11710400	11710800	0.69	75	90			chr1	70671200	70671600	0.265	19	18
chr1	6664000	6664400	0.72	86	97			chr1	11724000	11724400	0.585	64	84			chr1	70686800	70687200	0.255	15	15
chr1	6664400	6664800	0.6225	83	103			chr1	11731600	11732000	0.5575	65	84			chr1	70820400	70820800	0.3175	20	18
chr1	6673600	6674000	0.8275	110	120			chr1	11741200	11741600	0.815	95	95			chr1	78148400	78148800	0.265	17	16
chr1	6685200	6685600	0.655	78	80			chr1	11796000	11796400	0.655	73	78			chr1	85725200	85725600	0.36	22	20
chr1	6761600	6762000	0.68	91	127			chr1	11796400	11796800	0.655	62	63			chr1	86072800	86073200	0.2225	20	21
chr1	6762000	6762400	0.635	100	227			chr1	11809200	11809600	0.52	51	60			chr1	86174000	86174400	0.265	18	18
chr1	6844800	6845200	0.69	99	136			chr1	11845200	11845600	0.7925	82	92			chr1	89149600	89150000	0.2975	21	18
chr1	7727600	7728000	0.325	56	86			chr1	11850800	11851200	0.6325	61	66			chr1	90460400	90460800	0.2875	18	17
chr1	7738800	7739200	0.6475	77	102			chr1	11856400	11856800	0.775	86	92			chr1	91966800	91967200	0.2	15	15
chr1	7831200	7831600	0.6975	89	105			chr1	11857600	11858000	0.8075	81	96			chr1	93297600	93298000	0.3275	18	15
chr1	8014000	8014400	0.75	119	131			chr1	11858000	11858400	0.5025	54	63			chr1	93544400	93544800	0.24	21	24
chr1	8021200	8021600	0.4725	70	99			chr1	11858400	11858800	0.66	95	128			chr1	93646000	93646400	0.245	15	15
chr1	8021600	8022000	0.9225	190	239			chr1	11865600	11866000	0.7625	67	67			chr1	93811200	93811600	0.315	20	17
chr1	8035200	8035600	0.31	61	95			chr1	11866000	11866400	0.7875	80	88			chr1	94344400	94344800	0.205	15	15
chr1	8086400	8086800	0.9075	129	153			chr1	11902400	11902800	0.725	94	130			chr1	95391200	95391600	0.3175	20	17
chr1	8087200	8087600	0.7525	110	164			chr1	11919200	11919600	0.33	45	68			chr1	100435200	100435600	0.2675	19	18
chr1	8087600	8088000	0.68	87	97			chr1	11942800	11943200	0.515	90	136			chr1	100598400	100598800	0.365	21	18
chr1	8137200	8137600	0.5025	87	134			chr1	11943200	11943600	0.7175	72	74			chr1	100715200	100715600	0.275	19	18
chr1	8144400	8144800	0.3275	53	82			chr1	11968000	11968400	0.755	94	112			chr1	100816800	100817200	0.26	19	16
chr1	8154800	8155200	0.6225	89	123			chr1	11968400	11968800	0.9275	171	213			chr1	109642800	109643200	0.21	15	15
chr1	8176800	8177200	0.435	62	90			chr1	11968800	11969200	0.7475	61	57			chr1	109772400	109772800	0.2975	20	19
chr1	8180800	8181200	0.82	111	146			chr1	11969600	11970000	0.84	150	224			chr1	110527200	110527600	0.3275	21	19
chr1	8214800	8215200	0.56	99	175			chr1	11970000	11970400	0.4475	50	58			chr1	110881200	110881600	0.2725	17	17
chr1	8215600	8216000	0.5125	65	79			chr1	11986800	11987200	0.65	69	68			chr1	112298400	112298800	0.2475	16	16
chr1	8230000	8230400	0.645	83	105			chr1	12040000	12040400	0.7075	61	62			chr1	113008800	113009200	0.265	17	17
chr1	8230400	8230800	0.7425	105	143			chr1	12040400	12040800	0.7075	91	101			chr1	114354800	114355200	0.2575	15	15
chr1	8250000	8250400	0.75	128	243			chr1	12043600	12044000	0.6	76	110			chr1	114447600	114448000	0.245	17	17
chr1	8258000	8258400	0.795	112	145			chr1	12065600	12066000	0.8	85	98			chr1	114472000	114472400	0.2275	17	18
chr1	8260400	8260800	0.6075	93	163			chr1	12079200	12079600	0.7475	69	64			chr1	114889200	114889600	0.23	20	21
chr1	8272000	8272400	0.9625	183	311			chr1	12098800	12099200	0.75	93	106			chr1	115259200	115259600	0.245	17	19
chr1	8299600	8300000	0.6775	86	109			chr1	12135600	12136000	0.68	114	182			chr1	115300400	115300800	0.3125	20	18
chr1	8300000	8300400	0.7775	78	84			chr1	12222000	12222400	0.5825	75	110			chr1	115323200	115323600	0.3025	18	15
chr1	8301600	8302000	0.6025	93	126			chr1	12235200	12235600	0.515	71	88			chr1	116915600	116916000	0.185	14	16
chr1	8319200	8319600	0.93	157	197			chr1	12278400	12278800	0.615	104	176			chr1	119683200	119683600	0.275	17	15
chr1	8342000	8342400	0.535	61	95			chr1	12290000	12290400	0.6375	67	71			chr1	146556000	146556400	0.26	17	19
chr1	8374400	8374800	0.515	63	87			chr1	12468800	12469200	0.5725	54	58			chr1	146644000	146644400	0.31	18	17
chr1	8624000	8624400	0.37	59	103			chr1	12493600	12494000	0.675	74	93			chr1	146714000	146714400	0.1925	15	15
chr1	8631600	8632000	0.315	53	79			chr1	12494000	12494400	0.52	48	58			chr1	147735600	147736000	0.3375	21	22
chr1	8704000	8704400	0.5875	80	102			chr1	12508800	12509200	0.5575	99	187			chr1	147737200	147737600	0.2975	17	16
chr1	8763200	8763600	0.4925	85	117			chr1	12538000	12538400	0.5375	58	64			chr1	147806800	147807200	0.3	18	18
chr1	8800000	8800400	0.415	65	103			chr1	12538400	12538800	0.6925	97	122			chr1	149860000	149860400	0.2225	16	15
chr1	8802000	8802400	0.495	95	226			chr1	12570400	12570800	0.645	86	122			chr1	150039600	150040000	0.2375	15	15
chr1	8877600	8878000	0.765	98	105			chr1	12570800	12571200	0.5425	55	57			chr1	150208400	150208800	0.1975	13	15
chr1	8908800	8909200	0.6225	96	154			chr1	12588800	12589200	0.475	49	56			chr1	150266000	150266400	0.275	15	15
chr1	8938400	8938800	0.6925	87	95			chr1	12589200	12589600	0.42	56	72			chr1	150459600	150460000	0.2675	21	21
chr1	8938800	8939200	0.9125	141	154			chr1	12589600	12590000	0.635	62	76			chr1	150540800	150541200	0.23	15	15
chr1	8939200	8939600	0.5675	94	193			chr1	12610000	12610400	0.665	62	60			chr1	151042800	151043200	0.2875	16	17
chr1	8973600	8974000	0.74	102	155			chr1	12664400	12664800	0.565	83	150			chr1	151162400	151162800	0.235	17	19
chr1	9127200	9127600	0.2875	53	79			chr1	12678000	12678400	0.7625	62	59			chr1	151319200	151319600	0.255	15	15
chr1	9160400	9160800	0.445	72	105			chr1	12718000	12718400	0.59	61	68			chr1	151762800	151763200	0.26	15	15
chr1	9170800	9171200	0.58	71	87			chr1	14748800	14749200	0.4075	51	60			chr1	151882000	151882400	0.2525	17	16
chr1	9173200	9173600	0.8275	142	188			chr1	14762000	14762400	0.8975	109	125			chr1	153606400	153606800	0.3125	19	15
chr1	9188800	9189200	0.82	93	93			chr1	14763600	14764000	0.615	87	144			chr1	153939600	153940000	0.2675	16	15
chr1	9232000	9232400	0.335	51	86			chr1	14769600	14770000	0.6	59	64			chr1	153963200	153963600	0.2725	19	18
chr1	9241200	9241600	0.52	73	93			chr1	15104000	15104400	0.78	80	86			chr1	154155600	154156000	0.3225	18	16
chr1	9242400	9242800	0.695	85	101			chr1	15104400	15104800	0.815	87	96			chr1	154192800	154193200	0.2975	19	19
chr1	9293200	9293600	0.43	88	191			chr1	15105600	15106000	0.62	56	57			chr1	154531200	154531600	0.28	19	17
chr1	9294400	9294800	0.5775	99	160			chr1	15109600	15110000	0.605	66	70			chr1	154908800	154909200	0.255	17	18
chr1	9294800	9295200	0.46	71	90			chr1	15110400	15110800	0.365	46	63			chr1	154955600	154956000	0.265	17	19
chr1	9299600	9300000	0.5	74	113			chr1	15143600	15144000	0.3725	45	64			chr1	154973200	154973600	0.2875	24	25
chr1	9309600	9310000	0.8275	101	112			chr1	15166800	15167200	0.4125	61	74			chr1	154990000	154990400	0.2375	15	17
chr1	9310000	9310400	0.8825	132	165			chr1	15256000	15256400	0.52	56	61			chr1	155022800	155023200	0.1725	13	15
chr1	9462000	9462400	0.6025	77	106			chr1	15587200	15587600	0.72	73	70			chr1	155057200	155057600	0.2175	17	17
chr1	9488800	9489200	0.7925	120	209			chr1	15685200	15685600	0.405	47	61			chr1	155064000	155064400	0.1375	14	15
chr1	9495200	9495600	0.6325	110	192			chr1	15853200	15853600	0.89	116	136			chr1	155145600	155146000	0.255	17	19
chr1	9498800	9499200	0.7475	103	121			chr1	15870000	15870400	0.7025	102	145			chr1	155163200	155163600	0.23	14	15
chr1	9555200	9555600	0.4325	60	83			chr1	15943600	15944000	0.6525	63	66			chr1	155164400	155164800	0.305	19	15
chr1	9561200	9561600	0.8575	113	126			chr1	15944000	15944400	0.7075	62	67			chr1	155166000	155166400	0.225	14	15
chr1	9598000	9598400	0.78	133	183			chr1	16121600	16122000	0.6175	85	113			chr1	155214400	155214800	0.2875	22	22
chr1	9599200	9599600	0.855	102	111			chr1	16158400	16158800	0.68	65	64			chr1	155232000	155232400	0.3275	24	23
chr1	9610400	9610800	0.3275	59	139			chr1	16159600	16160000	0.7525	71	77			chr1	155278400	155278800	0.3175	20	19
chr1	9614000	9614400	0.5125	99	192			chr1	16160800	16161200	0.62	62	66			chr1	155904000	155904400	0.3125	22	16
chr1	9625200	9625600	0.74	102	148			chr1	16161200	16161600	0.8175	101	120			chr1	156052000	156052400	0.225	16	17
chr1	9687200	9687600	0.45	65	93			chr1	16162400	16162800	0.8775	106	136			chr1	156100000	156100400	0.2525	18	20
chr1	9777200	9777600	0.635	73	86			chr1	16173600	16174000	0.69	80	91			chr1	156163600	156164000	0.2925	17	15
chr1	9777600	9778000	0.965	171	202			chr1	16174000	16174400	0.685	59	57			chr1	156252400	156252800	0.2425	19	21
chr1	9970800	9971200	0.7975	91	92			chr1	16176400	16176800	0.7725	86	90			chr1	156308000	156308400	0.3225	17	15
chr1	9974400	9974800	0.6	68	80			chr1	16212400	16212800	0.735	64	59			chr1	156326800	156327200	0.2325	15	17
chr1	9989600	9990000	0.655	94	160			chr1	16212800	16213200	0.625	57	64			chr1	156571200	156571600	0.185	16	17
chr1	10003200	10003600	0.835	153	312			chr1	16276000	16276400	0.695	66	77			chr1	156629600	156630000	0.155	14	15
chr1	10092400	10092800	0.535	70	88			chr1	16279200	16279600	0.7925	110	155			chr1	156643600	156644000	0.3625	23	22
chr1	10229600	10230000	0.785	99	106			chr1	16302400	16302800	0.7725	91	98			chr1	156662800	156663200	0.3575	22	22
chr1	10231200	10231600	0.93	162	200			chr1	16339200	16339600	0.7725	77	80			chr1	156675600	156676000	0.19	12	15
chr1	10270400	10270800	0.7675	126	166			chr1	16382400	16382800	0.67	66	78			chr1	156698400	156698800	0.265	17	16
chr1	10458800	10459200	0.9675	198	261			chr1	16470400	16470800	0.645	72	84			chr1	156710800	156711200	0.3875	24	22
chr1	10459200	10459600	0.78	112	129			chr1	16472800	16473200	0.7375	82	96			chr1	156721600	156722000	0.255	19	18
chr1	10490400	10490800	0.975	199	247			chr1	16490800	16491200	0.5675	52	56			chr1	158969600	158970000	0.2475	16	15
chr1	10490800	10491200	0.7425	86	99			chr1	16499600	16500000	0.655	65	64			chr1	159750400	159750800	0.2325	18	19
chr1	10532400	10532800	0.9325	159	231			chr1	16533200	16533600	0.8125	94	93			chr1	160001600	160002000	0.2275	16	17
chr1	10534800	10535200	0.5825	93	179			chr1	16533600	16534000	0.7925	78	81			chr1	161015600	161016000	0.27	16	15
chr1	10746000	10746400	0.7425	105	138			chr1	16563600	16564000	0.8175	82	88			chr1	161136000	161136400	0.23	17	16
chr1	10997600	10998000	0.445	57	88			chr1	16575200	16575600	0.915	123	144			chr1	161147200	161147600	0.2825	17	16
chr1	11072400	11072800	0.725	98	118			chr1	16592800	16593200	0.2975	46	82			chr1	161172000	161172400	0.255	16	15
chr1	11072800	11073200	0.905	153	172			chr1	16593200	16593600	0.4425	62	92			chr1	163291600	163292000	0.3625	28	27
chr1	11107200	11107600	0.7925	106	123			chr1	16678800	16679200	0.8975	107	114			chr1	166808400	166808800	0.31	18	15
chr1	11159600	11160000	0.9	141	155			chr1	16693200	16693600	0.48	58	75			chr1	167772400	167772800	0.235	20	21
chr1	11322800	11323200	0.55	85	151			chr1	16693600	16694000	0.795	83	84			chr1	169455200	169455600	0.24	15	15
chr1	11327600	11328000	0.5025	80	108			chr1	16766800	16767200	0.6175	79	109			chr1	171454400	171454800	0.2975	19	19
chr1	11333200	11333600	0.795	140	178			chr1	16767200	16767600	0.725	79	80			chr1	173684000	173684400	0.235	20	18
chr1	11610800	11611200	0.2775	58	292			chr1	17380400	17380800	0.725	78	74			chr1	173836800	173837200	0.2475	17	15
chr1	11696000	11696400	0.2075	43	115			chr1	17686800	17687200	0.605	94	160			chr1	174968400	174968800	0.42	25	21
chr1	11724000	11724400	0.39	55	83			chr1	17764800	17765200	0.655	58	61			chr1	174992400	174992800	0.37	21	20
chr1	11731600	11732000	0.8825	116	133			chr1	17768000	17768400	0.795	81	75			chr1	179851600	179852000	0.2575	21	21
chr1	11845200	11845600	0.6125	69	78			chr1	18748400	18748800	0.2775	56	129			chr1	181111600	181112000	0.1575	13	15
chr1	11865600	11866000	0.9725	159	178			chr1	18857600	18858000	0.3525	56	68			chr1	182070400	182070800	0.24	21	22
chr1	11866000	11866400	0.815	111	126			chr1	18860800	18861200	0.3925	57	78			chr1	183440800	183441200	0.2175	18	17
chr1	11902800	11903200	0.52	90	189			chr1	19229200	19229600	0.7575	86	91			chr1	193028400	193028800	0.35	23	19
chr1	11919200	11919600	0.2975	68	329			chr1	19408000	19408400	0.755	70	72			chr1	193090800	193091200	0.265	18	18
chr1	11968000	11968400	0.725	129	202			chr1	19536400	19536800	0.655	70	78			chr1	197170400	197170800	0.2225	15	15
chr1	11968400	11968800	0.7575	98	109			chr1	19536800	19537200	0.8775	115	127			chr1	201083200	201083600	0.21	16	16
chr1	11986400	11986800	0.7275	84	92			chr1	19578000	19578400	0.955	137	149			chr1	201798000	201798400	0.25	14	15
chr1	11994800	11995200	0.61	104	176			chr1	19638800	19639200	0.8775	86	80			chr1	201865200	201865600	0.15	14	15
chr1	12040000	12040400	0.7875	97	117			chr1	19796000	19796400	0.7125	77	77			chr1	201924400	201924800	0.31	17	16
chr1	12040400	12040800	0.7275	118	163			chr1	19812400	19812800	0.7475	83	83			chr1	201977200	201977600	0.21	17	19
chr1	12079200	12079600	0.7025	81	89			chr1	19922800	19923200	0.6075	51	58			chr1	201979600	201980000	0.2525	16	15
chr1	12079600	12080000	0.7825	100	110			chr1	19923200	19923600	0.805	84	78			chr1	202777200	202777600	0.225	16	18
chr1	12441200	12441600	0.57	112	183			chr1	19923600	19924000	0.7975	70	60			chr1	202896400	202896800	0.245	22	22
chr1	12462400	12462800	0.61	86	114			chr1	20078800	20079200	0.4	45	56			chr1	202995200	202995600	0.225	14	15
chr1	12493600	12494000	0.635	79	94			chr1	20196400	20196800	0.42	68	147			chr1	203764400	203764800	0.245	16	17
chr1	12513600	12514000	0.7525	112	146			chr1	20204800	20205200	0.545	58	69			chr1	203830400	203830800	0.25	20	21
chr1	12538000	12538400	0.565	110	227			chr1	20208800	20209200	0.8	78	89			chr1	204053600	204054000	0.2	15	15
chr1	12585200	12585600	0.4625	63	94			chr1	20511600	20512000	0.6175	79	93			chr1	204183200	204183600	0.2625	17	18
chr1	12585600	12586000	0.735	98	111			chr1	20512000	20512400	0.715	66	72			chr1	204380800	204381200	0.3	19	17
chr1	12588400	12588800	0.82	184	265			chr1	20514400	20514800	0.6625	68	68			chr1	204463600	204464000	0.2475	14	15
chr1	12589200	12589600	0.28	51	97			chr1	20525600	20526000	0.455	65	86			chr1	205091200	205091600	0.36	23	23
chr1	12664400	12664800	0.5075	85	166			chr1	20834400	20834800	0.7	85	93			chr1	205263600	205264000	0.26	16	17
chr1	12674400	12674800	0.4025	66	100			chr1	20959600	20960000	0.57	57	61			chr1	205270400	205270800	0.335	25	23
chr1	12676000	12676400	0.9375	170	216			chr1	20987600	20988000	0.6725	80	88			chr1	205641200	205641600	0.215	17	19
chr1	12678000	12678400	0.63	65	80			chr1	21023200	21023600	0.56	58	63			chr1	206785600	206786000	0.3225	28	30
chr1	12678800	12679200	0.5975	103	186			chr1	21348800	21349200	0.7925	118	137			chr1	207226400	207226800	0.27	16	16
chr1	12679200	12679600	0.6925	80	99			chr1	21503200	21503600	0.52	67	71			chr1	207925200	207925600	0.275	16	15
chr1	15266000	15266400	0.7475	93	123			chr1	21503600	21504000	0.81	76	79			chr1	209957600	209958000	0.2525	17	17
chr1	15276400	15276800	0.4975	68	90			chr1	21588400	21588800	0.7075	78	74			chr1	210547200	210547600	0.265	16	16
chr1	15279200	15279600	0.8725	201	263			chr1	21646400	21646800	0.5375	75	104			chr1	210547600	210548000	0.275	16	16
chr1	15283200	15283600	0.54	67	86			chr1	21672000	21672400	0.64	80	91			chr1	211751200	211751600	0.2425	16	15
chr1	15348000	15348400	0.56	80	137			chr1	21672400	21672800	0.7175	83	89			chr1	212458000	212458400	0.3175	18	18
chr1	15466400	15466800	0.7525	106	156			chr1	21939600	21940000	0.6175	69	71			chr1	212782000	212782400	0.25	18	18
chr1	15472000	15472400	0.4775	72	113			chr1	21958400	21958800	0.6775	62	68			chr1	212964800	212965200	0.1625	19	25
chr1	15478000	15478400	0.64	83	103			chr1	21958800	21959200	0.88	115	132			chr1	214620400	214620800	0.26	17	15
chr1	15478800	15479200	0.725	87	95			chr1	21965200	21965600	0.725	69	68			chr1	218458400	218458800	0.2225	19	20
chr1	15516400	15516800	0.7225	104	117			chr1	21974400	21974800	0.6975	94	120			chr1	220219600	220220000	0.2275	15	15
chr1	15533200	15533600	0.4475	63	83			chr1	21985600	21986000	0.745	96	132			chr1	222638800	222639200	0.3	22	22
chr1	15598800	15599200	0.5475	75	102			chr1	21996000	21996400	0.7975	84	86			chr1	225117200	225117600	0.255	14	15
chr1	15853200	15853600	0.905	153	192			chr1	22002400	22002800	0.7425	106	139			chr1	225965200	225965600	0.2175	16	17
chr1	15911200	15911600	0.6575	106	177			chr1	22013600	22014000	0.6575	71	84			chr1	226111600	226112000	0.215	16	16
chr1	15911600	15912000	0.58	93	130			chr1	22014400	22014800	0.67	71	79			chr1	227922800	227923200	0.22	14	16
chr1	15930000	15930400	0.8225	135	244			chr1	22076400	22076800	0.6425	81	99			chr1	228290800	228291200	0.265	18	19
chr1	15944000	15944400	0.7875	97	93			chr1	22109200	22109600	0.6475	59	59			chr1	228296800	228297200	0.25	16	16
chr1	15945200	15945600	0.4875	79	132			chr1	22109600	22110000	0.89	99	114			chr1	228353200	228353600	0.2675	18	18
chr1	16068000	16068400	0.4025	55	93			chr1	22110000	22110400	0.755	85	100			chr1	229644000	229644400	0.2475	19	17
chr1	16126800	16127200	0.905	163	178			chr1	22118000	22118400	0.46	47	66			chr1	232246400	232246800	0.3525	21	19
chr1	16161200	16161600	0.9725	176	208			chr1	22118400	22118800	0.9375	133	177			chr1	234746400	234746800	0.2475	17	15
chr1	16162400	16162800	0.85	134	163			chr1	22231600	22232000	0.925	168	221			chr1	235292000	235292400	0.3675	24	20
chr1	16173600	16174000	0.715	79	85			chr1	22233200	22233600	0.755	95	109			chr1	236958400	236958800	0.32	17	17
chr1	16176000	16176400	0.87	105	115			chr1	22243200	22243600	0.4975	74	91			chr1	238811200	238811600	0.2525	15	15
chr1	16212800	16213200	0.6725	70	83			chr1	22264000	22264400	0.79	77	76			chr1	247095200	247095600	0.2975	21	20
chr1	16302400	16302800	0.8825	112	132			chr1	22290400	22290800	0.4225	46	56			chr10	556800	557200	0.1525	14	15
chr1	16330400	16330800	0.64	136	225			chr1	22345600	22346000	0.7275	81	93			chr10	5488400	5488800	0.22	16	17
chr1	16439600	16440000	0.455	70	124			chr1	22352000	22352400	0.805	97	103			chr10	5726400	5726800	0.27	20	18
chr1	16470400	16470800	0.83	124	199			chr1	22352400	22352800	0.8775	106	123			chr10	6130800	6131200	0.235	20	20
chr1	16471600	16472000	0.7225	83	91			chr1	22375200	22375600	0.7825	79	78			chr10	12085200	12085600	0.2275	15	15
chr1	16472800	16473200	0.8	89	106			chr1	22378800	22379200	0.59	55	61			chr10	12238000	12238400	0.2675	18	18
chr1	16482400	16482800	0.8425	134	183			chr1	22379200	22379600	0.575	66	70			chr10	13203200	13203600	0.315	19	19
chr1	16490800	16491200	0.79	105	124			chr1	22612000	22612400	0.54	51	56			chr10	13392000	13392400	0.26	17	15
chr1	16505200	16505600	0.9325	134	148			chr1	22778000	22778400	0.6925	74	83			chr10	13628800	13629200	0.205	16	17
chr1	16505600	16506000	0.7525	78	81			chr1	22778400	22778800	0.8475	112	122			chr10	14880000	14880400	0.3	16	15
chr1	16508400	16508800	0.885	132	151			chr1	23345600	23346000	0.8625	122	150			chr10	17243600	17244000	0.2275	15	17
chr1	16514400	16514800	0.435	57	86			chr1	23346000	23346400	0.67	61	61			chr10	18940400	18940800	0.2525	16	15
chr1	16563600	16564000	0.6075	76	90			chr1	23437200	23437600	0.4475	50	61			chr10	27443200	27443600	0.2425	15	16
chr1	16678800	16679200	0.9475	155	175			chr1	23441600	23442000	0.6425	64	69			chr10	27444000	27444400	0.24	16	15
chr1	16693600	16694000	0.88	141	183			chr1	23495200	23495600	0.6925	72	68			chr10	27530800	27531200	0.2275	14	15
chr1	16766800	16767200	0.46	99	233			chr1	23670800	23671200	0.78	76	67			chr10	30811600	30812000	0.2175	14	15
chr1	16767200	16767600	0.68	94	112			chr1	23671200	23671600	0.71	73	81			chr10	32635200	32635600	0.3225	21	22
chr1	17380400	17380800	0.745	110	134			chr1	23694400	23694800	0.695	58	66			chr10	43278000	43278400	0.2325	22	23
chr1	17906400	17906800	0.7575	94	99			chr1	23695200	23695600	0.8575	113	137			chr10	44806400	44806800	0.19	15	15
chr1	17906800	17907200	0.775	98	107			chr1	23730400	23730800	0.605	60	66			chr10	45360400	45360800	0.2375	15	15
chr1	17908000	17908400	0.6275	89	127			chr1	23805600	23806000	0.735	75	76			chr10	46090000	46090400	0.1675	15	17
chr1	17914800	17915200	0.68	90	140			chr1	23811200	23811600	0.6375	72	75			chr10	51827600	51828000	0.1825	12	15
chr1	17918400	17918800	0.8	175	331			chr1	23857600	23858000	0.7275	74	74			chr10	60028800	60029200	0.2725	18	16
chr1	18807200	18807600	0.7975	81	93			chr1	23866400	23866800	0.725	92	111			chr10	60723600	60724000	0.305	18	18
chr1	19226800	19227200	0.71	108	175			chr1	23884800	23885200	0.75	86	105			chr10	61808000	61808400	0.14	16	17
chr1	19227600	19228000	0.6375	109	194			chr1	23888800	23889200	0.665	61	69			chr10	64892800	64893200	0.385	21	20
chr1	19229200	19229600	0.8425	110	137			chr1	23894800	23895200	0.5675	48	63			chr10	65389200	65389600	0.295	20	23
chr1	19263600	19264000	0.555	83	125			chr1	23923600	23924000	0.5175	54	58			chr10	70091600	70092000	0.32	24	23
chr1	19275600	19276000	0.8575	152	254			chr1	24018000	24018400	0.57	83	111			chr10	70287200	70287600	0.235	14	15
chr1	19337600	19338000	0.525	76	99			chr1	24018400	24018800	0.705	76	74			chr10	70360000	70360400	0.2825	21	19
chr1	19340400	19340800	0.4275	63	79			chr1	24070000	24070400	0.63	60	58			chr10	70715600	70716000	0.2525	16	16
chr1	19536800	19537200	0.955	201	289			chr1	24104400	24104800	0.8275	120	141			chr10	70748400	70748800	0.2775	19	18
chr1	19549600	19550000	0.4	57	85			chr1	24117200	24117600	0.52	49	60			chr10	70883600	70884000	0.21	16	15
chr1	19578000	19578400	0.99	193	254			chr1	24117600	24118000	0.4725	55	62			chr10	70939600	70940000	0.2625	20	20
chr1	19638800	19639200	0.965	128	133			chr1	24126000	24126400	0.7275	74	80			chr10	71906400	71906800	0.2775	21	17
chr1	19664800	19665200	0.8625	114	144			chr1	24127200	24127600	0.7175	87	90			chr10	74114400	74114800	0.3275	19	18
chr1	19713600	19714000	0.6475	83	90			chr1	24151600	24152000	0.595	89	117			chr10	74927600	74928000	0.2675	19	17
chr1	19763200	19763600	0.52	80	129			chr1	24194800	24195200	0.7175	63	64			chr10	75012400	75012800	0.3075	18	15
chr1	19772400	19772800	0.725	122	208			chr1	24285600	24286000	0.725	71	79			chr10	75385600	75386000	0.2	15	15
chr1	19923200	19923600	0.8625	117	126			chr1	24286000	24286400	0.685	77	91			chr10	75490000	75490400	0.225	13	15
chr1	19946400	19946800	0.5625	91	131			chr1	24286400	24286800	0.675	80	98			chr10	75757600	75758000	0.295	16	16
chr1	20208800	20209200	0.96	159	177			chr1	24306400	24306800	0.8025	95	96			chr10	76995600	76996000	0.3075	17	17
chr1	20251600	20252000	0.3675	63	99			chr1	24306800	24307200	0.9	100	105			chr10	79789200	79789600	0.32	20	19
chr1	20301600	20302000	0.725	98	104			chr1	24648800	24649200	0.4775	57	64			chr10	80917200	80917600	0.1975	16	16
chr1	20314400	20314800	0.3075	57	114			chr1	24740000	24740400	0.8025	78	88			chr10	85899200	85899600	0.225	17	15
chr1	20802800	20803200	0.69	123	202			chr1	24742000	24742400	0.6825	68	70			chr10	88714000	88714400	0.2425	16	18
chr1	20806800	20807200	0.755	123	197			chr1	24969200	24969600	0.735	83	94			chr10	89622000	89622400	0.38	27	27
chr1	20813200	20813600	0.89	143	173			chr1	25071200	25071600	0.545	60	65			chr10	89623200	89623600	0.225	18	18
chr1	20820400	20820800	0.4475	56	79			chr1	25071600	25072000	0.7225	76	76			chr10	91461200	91461600	0.245	16	17
chr1	20834400	20834800	0.9175	171	213			chr1	25092000	25092400	0.875	113	134			chr10	92079200	92079600	0.17	15	17
chr1	20878400	20878800	0.7775	108	122			chr1	25174400	25174800	0.5825	64	81			chr10	93392800	93393200	0.3975	22	19
chr1	20959600	20960000	0.5	64	111			chr1	25174800	25175200	0.755	109	119			chr10	93558000	93558400	0.305	21	19
chr1	20987600	20988000	0.6025	87	124			chr1	25558800	25559200	0.815	85	84			chr10	93646800	93647200	0.2225	16	16
chr1	20988000	20988400	0.7975	92	101			chr1	25559200	25559600	0.8075	91	87			chr10	95205200	95205600	0.2675	17	20
chr1	21023200	21023600	0.74	77	82			chr1	25559600	25560000	0.88	97	93			chr10	95462400	95462800	0.1625	18	21
chr1	21059600	21060000	0.6825	97	130			chr1	25566400	25566800	0.855	101	113			chr10	96122400	96122800	0.2	17	18
chr1	21112800	21113200	0.8875	126	144			chr1	25573600	25574000	0.89	130	151			chr10	97453600	97454000	0.305	21	20
chr1	21113200	21113600	0.6725	76	87			chr1	25664800	25665200	0.8475	88	86			chr10	99094400	99094800	0.295	16	15
chr1	21348800	21349200	0.605	80	102			chr1	25739600	25740000	0.45	72	103			chr10	99205600	99206000	0.3525	21	18
chr1	21441600	21442000	0.435	65	83			chr1	25756400	25756800	0.555	54	62			chr10	99393200	99393600	0.18	15	15
chr1	21503200	21503600	0.75	88	89			chr1	25756800	25757200	0.76	84	87			chr10	99447200	99447600	0.2275	19	21
chr1	21578400	21578800	0.735	97	141			chr1	25876000	25876400	0.8525	99	102			chr10	101190400	101190800	0.2675	15	15
chr1	21596000	21596400	0.58	93	137			chr1	26109200	26109600	0.3925	50	65			chr10	101673600	101674000	0.36	24	25
chr1	21638800	21639200	0.4175	79	115			chr1	26146400	26146800	0.785	88	91			chr10	103578000	103578400	0.2275	16	16
chr1	21656000	21656400	0.7475	116	173			chr1	26185600	26186000	0.7725	92	105			chr10	103912000	103912400	0.3125	17	16
chr1	21665200	21665600	0.8825	133	192			chr1	26186000	26186400	0.795	87	92			chr10	104180800	104181200	0.285	18	15
chr1	21672000	21672400	0.7375	87	102			chr1	26188000	26188400	0.7375	66	69			chr10	104182400	104182800	0.23	18	18
chr1	21694800	21695200	0.335	55	98			chr1	26202000	26202400	0.715	71	76			chr10	104220800	104221200	0.255	19	18
chr1	21766400	21766800	0.735	85	100			chr1	26222000	26222400	0.5675	63	65			chr10	104404400	104404800	0.1775	14	15
chr1	21950000	21950400	0.6525	110	153			chr1	26232000	26232400	0.6175	63	67			chr10	104614000	104614400	0.305	18	16
chr1	21985600	21986000	0.485	92	355			chr1	26232800	26233200	0.6625	80	97			chr10	105041600	105042000	0.235	19	21
chr1	21996000	21996400	0.63	123	243			chr1	26260000	26260400	0.8775	109	117			chr10	106034400	106034800	0.245	14	15
chr1	22102400	22102800	0.3825	80	130			chr1	26324400	26324800	0.5075	75	99			chr10	111694800	111695200	0.1825	14	15
chr1	22109600	22110000	0.9525	146	157			chr1	26324800	26325200	0.875	133	156			chr10	111967200	111967600	0.23	20	23
chr1	22110000	22110400	0.71	100	138			chr1	26362000	26362400	0.7625	84	88			chr10	111970800	111971200	0.27	17	16
chr1	22257600	22258000	0.6175	106	145			chr1	26376400	26376800	0.5275	65	87			chr10	111985600	111986000	0.22	15	15
chr1	22273200	22273600	0.345	67	137			chr1	26396800	26397200	0.8325	120	156			chr10	112326800	112327200	0.2075	16	18
chr1	22351600	22352000	0.5675	73	97			chr1	26437200	26437600	0.7	67	69			chr10	112678800	112679200	0.255	16	15
chr1	22352000	22352400	0.8925	110	118			chr1	26438000	26438400	0.75	80	86			chr10	113943200	113943600	0.2125	18	19
chr1	22378800	22379200	0.495	75	160			chr1	26438400	26438800	0.6825	67	69			chr10	114592400	114592800	0.2525	17	17
chr1	22379200	22379600	0.55	68	93			chr1	26450000	26450400	0.78	86	88			chr10	116286400	116286800	0.1975	15	16
chr1	22674800	22675200	0.4375	91	165			chr1	26452800	26453200	0.7875	111	138			chr10	120354000	120354400	0.2625	19	18
chr1	22740800	22741200	0.5675	83	128			chr1	26453200	26453600	0.795	82	83			chr10	120514400	120514800	0.295	17	15
chr1	22743200	22743600	0.3975	57	78			chr1	26488000	26488400	0.7025	77	99			chr10	121652000	121652400	0.265	17	21
chr1	22778000	22778400	0.505	69	105			chr1	26496000	26496400	0.4525	59	79			chr10	124713600	124714000	0.25	19	19
chr1	22778400	22778800	0.96	147	216			chr1	26496400	26496800	0.745	106	98			chr10	124739600	124740000	0.21	15	15
chr1	22938000	22938400	0.225	34	84			chr1	26527600	26528000	0.7675	85	101			chr10	124913600	124914000	0.27	19	18
chr1	23289600	23290000	0.525	91	119			chr1	26560400	26560800	0.75	72	88			chr10	126158400	126158800	0.295	17	17
chr1	23345600	23346000	0.61	123	274			chr1	26560800	26561200	0.77	86	96			chr10	127408000	127408400	0.275	20	16
chr1	23495200	23495600	0.4225	58	88			chr1	26606000	26606400	0.6875	54	57			chr10	132847200	132847600	0.245	16	17
chr1	23514000	23514400	0.4425	94	168			chr1	26606400	26606800	0.8125	80	81			chr10	135207600	135208000	0.27	17	15
chr1	23550000	23550400	0.67	95	112			chr1	26606800	26607200	0.5725	51	56			chr11	450000	450400	0.22	15	15
chr1	23670800	23671200	0.8375	116	139			chr1	26611200	26611600	0.7925	109	151			chr11	518800	519200	0.2425	20	18
chr1	23671200	23671600	0.6175	83	102			chr1	26613600	26614000	0.635	85	119			chr11	728000	728400	0.195	14	16
chr1	23694400	23694800	0.81	100	126			chr1	26632800	26633200	0.545	54	67			chr11	783600	784000	0.2225	14	17
chr1	23695200	23695600	0.9	155	192			chr1	26634800	26635200	0.74	75	75			chr11	809600	810000	0.33	21	23
chr1	23750000	23750400	0.7825	109	127			chr1	26663200	26663600	0.8325	136	187			chr11	944800	945200	0.345	25	23
chr1	23750800	23751200	0.715	87	91			chr1	26704800	26705200	0.8425	126	150			chr11	2421600	2422000	0.3325	21	20
chr1	23805200	23805600	0.2375	54	81			chr1	26714000	26714400	0.3975	47	58			chr11	3078400	3078800	0.2075	15	18
chr1	23805600	23806000	0.6125	90	102			chr1	26735200	26735600	0.3825	69	125			chr11	3819200	3819600	0.19	13	15
chr1	23857600	23858000	0.76	102	107			chr1	26758400	26758800	0.7075	95	119			chr11	4116000	4116400	0.235	17	16
chr1	23881200	23881600	0.6225	76	87			chr1	26758800	26759200	0.66	83	107			chr11	6624800	6625200	0.285	20	18
chr1	23884800	23885200	0.9025	134	161			chr1	26798400	26798800	0.745	63	65			chr11	6640400	6640800	0.2425	16	17
chr1	23885600	23886000	0.51	77	115			chr1	26798800	26799200	0.735	71	91			chr11	6704400	6704800	0.2725	16	15
chr1	23886000	23886400	0.6125	74	89			chr1	26799200	26799600	0.6675	68	66			chr11	8008400	8008800	0.225	17	17
chr1	23888800	23889200	0.48	78	144			chr1	26799600	26800000	0.5275	53	59			chr11	8615600	8616000	0.255	14	15
chr1	23999600	24000000	0.255	48	116			chr1	26826800	26827200	0.8525	106	111			chr11	8704000	8704400	0.2875	17	16
chr1	24018000	24018400	0.54	99	170			chr1	26827600	26828000	0.8575	88	95			chr11	8710400	8710800	0.2975	21	17
chr1	24069600	24070000	0.425	56	88			chr1	26868400	26868800	0.7025	73	83			chr11	9406000	9406400	0.3475	22	19
chr1	24070000	24070400	0.8575	102	96			chr1	26947200	26947600	0.975	166	185			chr11	10373600	10374000	0.325	21	21
chr1	24104400	24104800	0.8525	127	149			chr1	26947600	26948000	0.8275	85	88			chr11	10388000	10388400	0.2375	20	21
chr1	24104800	24105200	0.605	86	110			chr1	26963200	26963600	0.715	64	66			chr11	16760000	16760400	0.315	22	16
chr1	24126000	24126400	0.7225	85	90			chr1	27004000	27004400	0.625	58	64			chr11	17099200	17099600	0.4175	26	22
chr1	24127200	24127600	0.74	115	140			chr1	27012400	27012800	0.5825	58	66			chr11	18343600	18344000	0.3575	24	16
chr1	24151600	24152000	0.895	145	254			chr1	27013200	27013600	0.5075	53	60			chr11	20408800	20409200	0.2825	17	16
chr1	24194400	24194800	0.82	92	103			chr1	27018800	27019200	0.7925	101	111			chr11	28131600	28132000	0.21	21	22
chr1	24194800	24195200	0.6625	82	102			chr1	27019600	27020000	0.8625	128	148			chr11	31391200	31391600	0.2225	18	18
chr1	24286000	24286400	0.91	142	203			chr1	27022000	27022400	0.895	147	216			chr11	31531200	31531600	0.315	19	19
chr1	24286400	24286800	0.52	74	94			chr1	27024800	27025200	0.675	68	77			chr11	32605200	32605600	0.225	15	15
chr1	24306400	24306800	0.7175	122	191			chr1	27048400	27048800	0.57	56	62			chr11	33182800	33183200	0.3275	19	18
chr1	24306800	24307200	0.8775	135	165			chr1	27050000	27050400	0.65	71	78			chr11	33824000	33824400	0.1925	16	16
chr1	24345200	24345600	0.55	92	139			chr1	27070400	27070800	0.3625	66	109			chr11	34126800	34127200	0.2975	23	22
chr1	24348000	24348400	0.8225	152	219			chr1	27098000	27098400	0.49	55	76			chr11	36310800	36311200	0.1975	19	18
chr1	24349200	24349600	0.705	94	100			chr1	27113200	27113600	0.84	93	98			chr11	36531600	36532000	0.18	15	16
chr1	24434800	24435200	0.6375	84	130			chr1	27114400	27114800	0.7725	80	78			chr11	43333200	43333600	0.2325	15	15
chr1	24444800	24445200	0.5275	70	95			chr1	27115600	27116000	0.54	57	66			chr11	44087600	44088000	0.315	21	18
chr1	24446400	24446800	0.895	112	108			chr1	27118000	27118400	0.445	58	94			chr11	44265200	44265600	0.1925	12	16
chr1	24740000	24740400	0.835	98	109			chr1	27191600	27192000	0.8325	73	75			chr11	46318400	46318800	0.23	14	15
chr1	24742000	24742400	0.8225	107	119			chr1	27216400	27216800	0.745	87	95			chr11	46360400	46360800	0.215	15	15
chr1	24828800	24829200	0.6125	84	90			chr1	27226800	27227200	0.8275	109	114			chr11	46722000	46722400	0.2175	14	15
chr1	24867600	24868000	0.69	86	102			chr1	27240800	27241200	0.5675	63	62			chr11	47270400	47270800	0.2325	21	20
chr1	24878400	24878800	0.5675	97	130			chr1	27248000	27248400	0.665	64	77			chr11	47376800	47377200	0.1625	14	16
chr1	24878800	24879200	0.5375	68	85			chr1	27248400	27248800	0.695	69	66			chr11	47600400	47600800	0.29	23	25
chr1	24885600	24886000	0.56	72	96			chr1	27339200	27339600	0.5975	52	57			chr11	47664000	47664400	0.2525	17	16
chr1	24894400	24894800	0.7225	145	222			chr1	27353600	27354000	0.66	61	61			chr11	57092400	57092800	0.245	14	15
chr1	24932000	24932400	0.6375	80	97			chr1	27372400	27372800	0.52	59	62			chr11	57250400	57250800	0.1775	14	15
chr1	24969200	24969600	0.9025	141	211			chr1	27400800	27401200	0.6525	90	112			chr11	57260800	57261200	0.2525	18	18
chr1	25032000	25032400	0.88	106	105			chr1	27425600	27426000	0.6325	57	65			chr11	57406800	57407200	0.4125	24	21
chr1	25050800	25051200	0.5175	64	85			chr1	27481600	27482000	0.9	116	136			chr11	57424800	57425200	0.1975	19	19
chr1	25071600	25072000	0.96	159	186			chr1	27483600	27484000	0.385	50	58			chr11	57508800	57509200	0.345	31	27
chr1	25094000	25094400	0.305	53	101			chr1	27560800	27561200	0.8225	96	95			chr11	57529200	57529600	0.215	16	15
chr1	25174800	25175200	0.7275	84	84			chr1	27648400	27648800	0.6925	105	145			chr11	59318000	59318400	0.28	19	17
chr1	25237600	25238000	0.7825	108	137			chr1	27648800	27649200	0.63	66	80			chr11	59578000	59578400	0.275	19	21
chr1	25242800	25243200	0.68	84	87			chr1	27718800	27719200	0.8675	93	94			chr11	60609200	60609600	0.25	23	24
chr1	25466800	25467200	0.5425	78	138			chr1	27754800	27755200	0.67	87	104			chr11	61100400	61100800	0.2825	20	15
chr1	25494000	25494400	0.7975	116	151			chr1	27816400	27816800	0.7625	76	88			chr11	61276800	61277200	0.25	16	17
chr1	25494800	25495200	0.49	82	144			chr1	27816800	27817200	0.7925	82	79			chr11	61334800	61335200	0.245	21	20
chr1	25500800	25501200	0.425	64	102			chr1	27817200	27817600	0.6175	63	65			chr11	61348800	61349200	0.245	19	19
chr1	25558800	25559200	0.865	136	148			chr1	27852000	27852400	0.615	51	56			chr11	61739200	61739600	0.2425	15	17
chr1	25566400	25566800	0.8325	122	147			chr1	27853200	27853600	0.76	73	71			chr11	62358800	62359200	0.2825	21	22
chr1	25573600	25574000	0.8275	126	212			chr1	27855600	27856000	0.555	58	64			chr11	62389600	62390000	0.23	16	16
chr1	25574000	25574400	0.8525	89	101			chr1	27869200	27869600	0.9425	171	227			chr11	62446400	62446800	0.3075	19	16
chr1	25664800	25665200	0.84	109	122			chr1	27930400	27930800	0.685	67	67			chr11	62474800	62475200	0.275	23	24
chr1	25756800	25757200	0.69	88	110			chr1	27935200	27935600	0.67	97	105			chr11	62554000	62554400	0.1925	14	16
chr1	26146000	26146400	0.4475	59	83			chr1	28052000	28052400	0.7775	76	80			chr11	62554800	62555200	0.2775	19	18
chr1	26146400	26146800	0.9675	150	160			chr1	28099600	28100000	0.7675	71	64			chr11	62572800	62573200	0.32	21	19
chr1	26185600	26186000	0.6275	92	118			chr1	28157200	28157600	0.845	90	93			chr11	62676800	62677200	0.265	19	20
chr1	26186000	26186400	0.5675	86	118			chr1	28193600	28194000	0.5325	66	101			chr11	63438800	63439200	0.2225	15	15
chr1	26202000	26202400	0.535	90	213			chr1	28240800	28241200	0.7025	83	87			chr11	63753600	63754000	0.315	17	16
chr1	26232800	26233200	0.5475	71	90			chr1	28241200	28241600	0.8825	109	117			chr11	64037200	64037600	0.2725	17	17
chr1	26323600	26324000	0.5325	59	79			chr1	28306000	28306400	0.455	68	101			chr11	64863600	64864000	0.225	21	23
chr1	26324400	26324800	0.605	75	96			chr1	28392400	28392800	0.6025	67	78			chr11	64885200	64885600	0.24	16	15
chr1	26324800	26325200	0.73	130	275			chr1	28414800	28415200	0.86	97	107			chr11	64889600	64890000	0.2125	17	17
chr1	26345200	26345600	0.45	76	136			chr1	28441600	28442000	0.42	44	56			chr11	65189600	65190000	0.21	14	15
chr1	26362000	26362400	0.8575	101	95			chr1	28499200	28499600	0.49	75	105			chr11	65190000	65190400	0.2675	17	17
chr1	26437200	26437600	0.5675	68	82			chr1	28559200	28559600	0.69	77	90			chr11	65244800	65245200	0.2475	15	15
chr1	26438400	26438800	0.8675	98	101			chr1	28562400	28562800	0.65	60	68			chr11	65255200	65255600	0.2475	16	17
chr1	26496000	26496400	0.2675	55	91			chr1	28585600	28586000	0.795	82	92			chr11	65264800	65265200	0.375	27	24
chr1	26496400	26496800	0.865	178	232			chr1	28586000	28586400	0.775	81	82			chr11	65266400	65266800	0.2375	20	22
chr1	26551600	26552000	0.79	103	126			chr1	28593600	28594000	0.5925	59	68			chr11	65337600	65338000	0.2875	20	20
chr1	26560400	26560800	0.8725	114	134			chr1	28655200	28655600	0.8325	106	123			chr11	65479200	65479600	0.2325	18	19
chr1	26560800	26561200	0.8625	104	105			chr1	28655600	28656000	0.7125	72	74			chr11	65585600	65586000	0.235	15	15
chr1	26606400	26606800	0.8925	123	136			chr1	28678000	28678400	0.8375	85	93			chr11	65627600	65628000	0.2075	13	15
chr1	26632800	26633200	0.6075	70	81			chr1	28678400	28678800	0.6525	60	57			chr11	65686800	65687200	0.195	19	19
chr1	26677200	26677600	0.7625	118	219			chr1	28696000	28696400	0.7975	95	114			chr11	65769600	65770000	0.325	23	25
chr1	26678000	26678400	0.69	82	109			chr1	28827600	28828000	0.6575	78	96			chr11	65819600	65820000	0.24	15	16
chr1	26685200	26685600	0.65	68	79			chr1	28832000	28832400	0.88	90	94			chr11	65990000	65990400	0.1425	11	15
chr1	26714000	26714400	0.56	98	184			chr1	28832400	28832800	0.72	78	93			chr11	66050000	66050400	0.155	15	15
chr1	26735200	26735600	0.1725	39	431			chr1	28832800	28833200	0.8025	84	88			chr11	66095600	66096000	0.155	15	15
chr1	26758400	26758800	0.7	137	323			chr1	28836400	28836800	0.7675	79	88			chr11	66112400	66112800	0.2775	18	18
chr1	26758800	26759200	0.4975	79	124			chr1	28836800	28837200	0.825	94	101			chr11	66176000	66176400	0.2	14	15
chr1	26799600	26800000	0.4725	71	100			chr1	28838000	28838400	0.7475	66	65			chr11	66189200	66189600	0.21	17	19
chr1	26826800	26827200	0.9575	126	148			chr1	28844400	28844800	0.5225	49	56			chr11	66206400	66206800	0.2525	14	15
chr1	26827200	26827600	0.8375	120	134			chr1	28844800	28845200	0.6875	79	74			chr11	66278000	66278400	0.2325	16	17
chr1	26857600	26858000	0.525	65	86			chr1	28845200	28845600	0.68	61	61			chr11	66384000	66384400	0.2725	17	16
chr1	26947200	26947600	0.9825	207	250			chr1	28851600	28852000	0.5125	67	77			chr11	66445200	66445600	0.2275	15	15
chr1	27018800	27019200	0.89	99	101			chr1	28878800	28879200	0.655	65	67			chr11	66610800	66611200	0.2025	15	15
chr1	27019600	27020000	0.8275	146	208			chr1	28879200	28879600	0.72	84	90			chr11	67007200	67007600	0.2525	19	19
chr1	27022000	27022400	0.8925	153	319			chr1	28879600	28880000	0.615	61	62			chr11	67159200	67159600	0.3175	21	21
chr1	27032800	27033200	0.4575	61	97			chr1	28908000	28908400	0.5325	85	116			chr11	67195600	67196000	0.1925	14	17
chr1	27050000	27050400	0.7125	84	98			chr1	28908400	28908800	0.795	98	110			chr11	67236800	67237200	0.2025	18	19
chr1	27110400	27110800	0.4575	52	84			chr1	28916400	28916800	0.4575	74	120			chr11	68671200	68671600	0.2625	21	22
chr1	27110800	27111200	0.46	54	84			chr1	28969200	28969600	0.6125	67	84			chr11	69451200	69451600	0.225	15	15
chr1	27114400	27114800	0.885	110	113			chr1	28969600	28970000	0.905	114	114			chr11	71814400	71814800	0.2725	17	19
chr1	27158400	27158800	0.415	60	124			chr1	28974400	28974800	0.835	105	124			chr11	72145200	72145600	0.3175	21	18
chr1	27165200	27165600	0.5675	78	137			chr1	28974800	28975200	0.66	71	82			chr11	72504800	72505200	0.3325	20	17
chr1	27191600	27192000	0.92	141	152			chr1	28975200	28975600	0.91	177	247			chr11	73472000	73472400	0.2325	14	16
chr1	27208000	27208400	0.44	79	121			chr1	28994800	28995200	0.745	76	71			chr11	73490400	73490800	0.3525	20	19
chr1	27216400	27216800	0.8325	160	228			chr1	29063200	29063600	0.925	153	159			chr11	73498800	73499200	0.3925	22	21
chr1	27226800	27227200	0.855	140	202			chr1	29208400	29208800	0.41	47	56			chr11	73587600	73588000	0.265	19	21
chr1	27236800	27237200	0.6125	75	120			chr1	29208800	29209200	0.7325	103	118			chr11	74109600	74110000	0.2725	15	16
chr1	27237200	27237600	0.85	113	155			chr1	29210400	29210800	0.775	128	214			chr11	74660000	74660400	0.2375	20	20
chr1	27240400	27240800	0.97	183	246			chr1	29211200	29211600	0.595	75	113			chr11	75110400	75110800	0.23	19	20
chr1	27240800	27241200	0.6375	128	203			chr1	29211600	29212000	0.3875	61	109			chr11	75275200	75275600	0.245	17	16
chr1	27241600	27242000	0.625	86	96			chr1	29213200	29213600	0.815	100	105			chr11	76155600	76156000	0.23	15	15
chr1	27248000	27248400	0.7575	129	188			chr1	29229200	29229600	0.5375	56	67			chr11	76166400	76166800	0.28	18	17
chr1	27248400	27248800	0.6925	92	113			chr1	29253200	29253600	0.5775	86	113			chr11	77185200	77185600	0.2125	18	20
chr1	27264800	27265200	0.7975	121	191			chr1	29359600	29360000	0.475	53	61			chr11	77790800	77791200	0.24	17	18
chr1	27270400	27270800	0.3675	65	148			chr1	29483200	29483600	0.7075	111	149			chr11	77850400	77850800	0.21	17	17
chr1	27286800	27287200	0.61	79	99			chr1	29483600	29484000	0.63	72	78			chr11	82612400	82612800	0.215	13	15
chr1	27288400	27288800	0.52	68	93			chr1	29506400	29506800	0.5975	57	62			chr11	82782800	82783200	0.3525	19	19
chr1	27293200	27293600	0.5225	61	85			chr1	29508000	29508400	0.82	79	72			chr11	82997200	82997600	0.29	20	21
chr1	27317200	27317600	0.6325	82	114			chr1	29508400	29508800	0.9025	122	126			chr11	85376000	85376400	0.23	13	15
chr1	27317600	27318000	0.6575	93	118			chr1	29529200	29529600	0.58	85	116			chr11	94501200	94501600	0.2675	15	15
chr1	27319200	27319600	0.6	81	99			chr1	29557200	29557600	0.74	88	107			chr11	96076400	96076800	0.2175	15	15
chr1	27320000	27320400	0.675	142	265			chr1	30657200	30657600	0.6575	82	100			chr11	102217600	102218000	0.24	15	15
chr1	27324000	27324400	0.56	89	125			chr1	30664000	30664400	0.4575	55	65			chr11	105947600	105948000	0.3125	19	16
chr1	27481600	27482000	0.73	146	275			chr1	31191600	31192000	0.895	133	152			chr11	111749600	111750000	0.265	17	18
chr1	27560800	27561200	0.835	126	142			chr1	31192000	31192400	0.7125	63	67			chr11	111957200	111957600	0.23	14	15
chr1	27648400	27648800	0.665	137	266			chr1	31200800	31201200	0.385	54	67			chr11	112832000	112832400	0.145	13	15
chr1	27648800	27649200	0.6625	113	143			chr1	31229600	31230000	0.8725	115	127			chr11	113906800	113907200	0.2275	16	19
chr1	27668400	27668800	0.6475	87	103			chr1	31234400	31234800	0.56	48	58			chr11	116147200	116147600	0.2275	15	16
chr1	27669600	27670000	0.7825	79	83			chr1	31238800	31239200	0.7975	73	76			chr11	116643600	116644000	0.205	14	15
chr1	27718800	27719200	0.66	77	94			chr1	31241600	31242000	0.7075	110	204			chr11	116969200	116969600	0.1825	14	15
chr1	27816400	27816800	0.8575	110	138			chr1	31242000	31242400	0.83	100	118			chr11	117052000	117052400	0.2025	15	15
chr1	27816800	27817200	0.9275	114	118			chr1	31250800	31251200	0.6975	71	78			chr11	118122800	118123200	0.3225	19	18
chr1	27831200	27831600	0.93	148	182			chr1	31251200	31251600	0.9175	138	166			chr11	118230000	118230400	0.185	16	18
chr1	27868800	27869200	0.61	87	112			chr1	31252400	31252800	0.545	64	75			chr11	118306800	118307200	0.2475	16	16
chr1	27890000	27890400	0.765	137	239			chr1	31296800	31297200	0.7225	83	97			chr11	118505600	118506000	0.2875	17	15
chr1	27900800	27901200	0.6625	93	130			chr1	31297200	31297600	0.565	58	62			chr11	118800800	118801200	0.2525	18	19
chr1	27933600	27934000	0.33	59	118			chr1	31344800	31345200	0.5075	55	73			chr11	118888800	118889200	0.27	17	17
chr1	27934000	27934400	0.6875	109	159			chr1	31345200	31345600	0.655	84	122			chr11	118901600	118902000	0.18	13	16
chr1	28052000	28052400	0.8825	137	163			chr1	31360400	31360800	0.53	50	57			chr11	118938400	118938800	0.1825	13	15
chr1	28099600	28100000	0.91	112	118			chr1	31392000	31392400	0.8725	104	110			chr11	118955600	118956000	0.33	19	15
chr1	28157200	28157600	0.885	152	205			chr1	31392400	31392800	0.4925	50	56			chr11	118972800	118973200	0.23	17	20
chr1	28240800	28241200	0.615	75	84			chr1	31538400	31538800	0.925	124	132			chr11	118992000	118992400	0.255	16	15
chr1	28241200	28241600	0.685	90	105			chr1	31574000	31574400	0.6725	76	81			chr11	119252400	119252800	0.245	14	15
chr1	28270000	28270400	0.42	70	119			chr1	31628000	31628400	0.565	68	85			chr11	120206800	120207200	0.245	19	18
chr1	28414800	28415200	0.7275	104	135			chr1	31632800	31633200	0.7375	100	118			chr11	121163200	121163600	0.245	16	17
chr1	28481200	28481600	0.3425	65	110			chr1	31635600	31636000	0.5775	53	60			chr11	121322800	121323200	0.2425	16	16
chr1	28559200	28559600	0.74	107	131			chr1	31643600	31644000	0.6325	76	100			chr11	123612000	123612400	0.2375	15	15
chr1	28562400	28562800	0.6575	120	183			chr1	31644000	31644400	0.5525	85	132			chr11	125439200	125439600	0.2275	15	15
chr1	28562800	28563200	0.905	139	170			chr1	31654400	31654800	0.615	66	71			chr11	125462400	125462800	0.3	19	17
chr1	28586000	28586400	0.8525	102	120			chr1	31769200	31769600	0.5525	51	56			chr11	125495600	125496000	0.31	18	16
chr1	28623200	28623600	0.825	130	160			chr1	31769600	31770000	0.7025	71	64			chr11	126081200	126081600	0.26	15	17
chr1	28640400	28640800	0.4525	76	112			chr1	31944400	31944800	0.6675	69	75			chr11	126138800	126139200	0.275	17	15
chr1	28655200	28655600	0.7975	124	171			chr1	32110000	32110400	0.8275	91	103			chr11	128603600	128604000	0.205	15	16
chr1	28696000	28696400	0.7975	120	145			chr1	32110400	32110800	0.745	73	83			chr11	130016400	130016800	0.25	16	16
chr1	28696400	28696800	0.92	140	154			chr1	32170800	32171200	0.36	43	60			chr11	130732000	130732400	0.1725	13	15
chr1	28764400	28764800	0.445	63	81			chr1	32254000	32254400	0.725	68	75			chr12	2922000	2922400	0.275	17	17
chr1	28832000	28832400	0.76	88	97			chr1	32281600	32282000	0.7075	123	150			chr12	4382800	4383200	0.275	19	17
chr1	28832400	28832800	0.74	94	112			chr1	32292800	32293200	0.7525	95	123			chr12	4386000	4386400	0.1525	14	17
chr1	28844400	28844800	0.455	75	109			chr1	32354800	32355200	0.595	58	66			chr12	6729600	6730000	0.3	22	18
chr1	28844800	28845200	0.64	70	81			chr1	32394400	32394800	0.505	73	89			chr12	6772400	6772800	0.215	16	16
chr1	28845200	28845600	0.535	63	81			chr1	32403200	32403600	0.5525	55	72			chr12	6833200	6833600	0.25	18	18
chr1	28879200	28879600	0.6175	119	181			chr1	32404000	32404400	0.7975	105	134			chr12	6981600	6982000	0.2375	18	20
chr1	28879600	28880000	0.6625	80	97			chr1	32405200	32405600	0.5425	54	69			chr12	7000400	7000800	0.2525	21	21
chr1	28908000	28908400	0.5375	93	217			chr1	32405600	32406000	0.685	89	104			chr12	7047200	7047600	0.345	25	24
chr1	28908400	28908800	0.8225	148	198			chr1	32410000	32410400	0.94	146	170			chr12	7079600	7080000	0.25	19	20
chr1	28969200	28969600	0.445	95	160			chr1	32410400	32410800	0.725	80	79			chr12	9102400	9102800	0.2975	18	16
chr1	28969600	28970000	0.8525	140	184			chr1	32420400	32420800	0.76	106	117			chr12	10766000	10766400	0.225	20	20
chr1	28974800	28975200	0.54	112	266			chr1	32421600	32422000	0.825	109	119			chr12	11653600	11654000	0.1975	17	16
chr1	28975200	28975600	0.765	103	129			chr1	32423200	32423600	0.5725	62	80			chr12	12420000	12420400	0.3825	24	20
chr1	29063200	29063600	0.995	194	246			chr1	32423600	32424000	0.6775	66	75			chr12	12837200	12837600	0.1875	17	19
chr1	29208400	29208800	0.2725	58	86			chr1	32429600	32430000	0.4925	62	82			chr12	12966000	12966400	0.26	21	22
chr1	29472400	29472800	0.5725	68	101			chr1	32478800	32479200	0.695	82	89			chr12	13408800	13409200	0.3325	21	22
chr1	29508000	29508400	0.865	97	103			chr1	32479200	32479600	0.8375	87	90			chr12	14410800	14411200	0.365	23	21
chr1	29508400	29508800	0.8975	147	205			chr1	32538400	32538800	0.85	99	105			chr12	14413600	14414000	0.27	19	18
chr1	29557200	29557600	0.71	121	169			chr1	32573600	32574000	0.785	81	81			chr12	14518400	14518800	0.3	18	17
chr1	31191600	31192000	0.99	177	223			chr1	32599200	32599600	0.8075	121	167			chr12	25102000	25102400	0.2275	15	16
chr1	31320400	31320800	0.8175	95	101			chr1	32644800	32645200	0.6825	68	79			chr12	27167200	27167600	0.275	15	16
chr1	31538400	31538800	0.9325	157	186			chr1	32645200	32645600	0.8775	114	125			chr12	27863600	27864000	0.2575	18	15
chr1	31643600	31644000	0.74	99	124			chr1	32666000	32666400	0.6925	64	64			chr12	28912400	28912800	0.1525	14	15
chr1	31655200	31655600	0.43	72	145			chr1	32671200	32671600	0.7075	87	84			chr12	31478800	31479200	0.24	15	15
chr1	31769600	31770000	0.77	112	115			chr1	32688000	32688400	0.6675	62	64			chr12	31539200	31539600	0.31	20	18
chr1	31867600	31868000	0.7075	83	86			chr1	32701600	32702000	0.7125	82	88			chr12	31882000	31882400	0.29	16	16
chr1	31890000	31890400	0.565	88	158			chr1	32713600	32714000	0.6475	84	93			chr12	32112000	32112400	0.2925	19	21
chr1	31907200	31907600	0.8225	125	154			chr1	32757200	32757600	0.69	75	82			chr12	32832000	32832400	0.24	14	15
chr1	31915200	31915600	0.6075	77	94			chr1	32757600	32758000	0.815	95	111			chr12	34175200	34175600	0.23	16	15
chr1	31917600	31918000	0.81	102	115			chr1	32800800	32801200	0.5125	60	72			chr12	42878000	42878400	0.295	15	15
chr1	31922400	31922800	0.505	72	108			chr1	32816400	32816800	0.4825	71	100			chr12	43150800	43151200	0.2325	15	15
chr1	31974800	31975200	0.845	133	217			chr1	32817200	32817600	0.7275	58	57			chr12	45342400	45342800	0.195	18	21
chr1	32014400	32014800	0.695	79	87			chr1	32856400	32856800	0.5425	61	74			chr12	46121200	46121600	0.3225	22	24
chr1	32038400	32038800	0.48	67	87			chr1	32856800	32857200	0.4325	58	91			chr12	46384400	46384800	0.235	21	22
chr1	32041200	32041600	0.695	94	104			chr1	32859600	32860000	0.585	55	60			chr12	46765200	46765600	0.24	18	16
chr1	32110000	32110400	0.7325	140	195			chr1	32860000	32860400	0.725	98	122			chr12	48099600	48100000	0.2225	17	17
chr1	32110400	32110800	0.87	115	118			chr1	33116000	33116400	0.7225	78	78			chr12	48431200	48431600	0.265	17	16
chr1	32166800	32167200	0.6475	88	152			chr1	33116400	33116800	0.9275	136	188			chr12	49110400	49110800	0.3075	18	17
chr1	32180800	32181200	0.7825	137	213			chr1	33116800	33117200	0.8625	84	85			chr12	49318400	49318800	0.2425	15	16
chr1	32181200	32181600	0.525	73	90			chr1	33177600	33178000	0.3775	50	56			chr12	49412400	49412800	0.27	17	17
chr1	32189200	32189600	0.2225	48	126			chr1	33190800	33191200	0.6875	98	121			chr12	49454400	49454800	0.325	29	30
chr1	32281600	32282000	0.475	69	117			chr1	33221200	33221600	0.415	45	56			chr12	49463600	49464000	0.23	15	15
chr1	32404000	32404400	0.675	138	369			chr1	33222800	33223200	0.525	75	104			chr12	49524000	49524400	0.285	21	21
chr1	32405600	32406000	0.625	85	112			chr1	33282800	33283200	0.77	111	172			chr12	50101200	50101600	0.23	17	17
chr1	32429600	32430000	0.33	58	90			chr1	33283600	33284000	0.6575	64	65			chr12	50419200	50419600	0.245	18	17
chr1	32479200	32479600	0.9225	147	170			chr1	33352000	33352400	0.315	60	119			chr12	51663200	51663600	0.205	15	16
chr1	32538400	32538800	0.85	124	154			chr1	33405200	33405600	0.3575	46	57			chr12	53400000	53400400	0.2875	16	16
chr1	32573600	32574000	0.935	153	177			chr1	33430400	33430800	0.645	64	60			chr12	53715200	53715600	0.33	20	19
chr1	32645200	32645600	0.965	178	216			chr1	33454800	33455200	0.5075	54	70			chr12	53845600	53846000	0.2975	22	22
chr1	32671200	32671600	0.6925	80	89			chr1	33475200	33475600	0.45	72	97			chr12	53892400	53892800	0.235	20	21
chr1	32706800	32707200	0.56	79	110			chr1	33502400	33502800	0.8575	101	110			chr12	54020000	54020400	0.34	21	19
chr1	32713600	32714000	0.4625	76	117			chr1	33520800	33521200	0.695	66	73			chr12	54069600	54070000	0.295	20	18
chr1	32715600	32716000	0.6575	122	193			chr1	33592800	33593200	0.8	99	103			chr12	54140400	54140800	0.195	14	17
chr1	32757200	32757600	0.6025	85	101			chr1	33815600	33816000	0.825	90	93			chr12	54653200	54653600	0.29	17	17
chr1	32757600	32758000	0.6575	90	111			chr1	33938000	33938400	0.69	69	71			chr12	54674400	54674800	0.3	18	15
chr1	32787200	32787600	0.4175	88	173			chr1	35309200	35309600	0.6525	101	136			chr12	54773200	54773600	0.1225	11	15
chr1	32801600	32802000	0.535	74	96			chr1	35318400	35318800	0.4	51	60			chr12	56109600	56110000	0.245	20	19
chr1	32816400	32816800	0.4375	74	140			chr1	35325200	35325600	0.8825	110	141			chr12	56130800	56131200	0.2275	14	16
chr1	32817200	32817600	0.745	83	87			chr1	35390400	35390800	0.26	47	91			chr12	56367600	56368000	0.24	16	16
chr1	32859600	32860000	0.7075	75	83			chr1	35450800	35451200	0.7525	77	86			chr12	56435600	56436000	0.3	19	17
chr1	32860000	32860400	0.825	142	191			chr1	35497200	35497600	0.8525	90	89			chr12	56498000	56498400	0.3	20	17
chr1	33077600	33078000	0.6225	71	87			chr1	35544800	35545200	0.7375	79	88			chr12	56510400	56510800	0.2975	18	16
chr1	33116400	33116800	0.83	114	152			chr1	35602400	35602800	0.2775	48	78			chr12	56511600	56512000	0.25	17	18
chr1	33116800	33117200	0.895	147	184			chr1	35657600	35658000	0.7025	62	63			chr12	56520000	56520400	0.2175	17	17
chr1	33177600	33178000	0.38	70	107			chr1	35658400	35658800	0.7275	91	113			chr12	56521600	56522000	0.205	15	15
chr1	33180000	33180400	0.3975	57	99			chr1	35734000	35734400	0.8125	69	71			chr12	56709600	56710000	0.305	22	20
chr1	33182400	33182800	0.59	75	97			chr1	35734400	35734800	0.685	61	56			chr12	56862000	56862400	0.2225	19	21
chr1	33202800	33203200	0.5825	108	184			chr1	35744800	35745200	0.5675	85	134			chr12	57024000	57024400	0.19	15	17
chr1	33225600	33226000	0.7625	115	163			chr1	35965200	35965600	0.5925	89	108			chr12	57082000	57082400	0.265	20	17
chr1	33282800	33283200	0.815	156	343			chr1	36022800	36023200	0.695	62	58			chr12	57118800	57119200	0.2375	15	16
chr1	33352000	33352400	0.27	71	364			chr1	36023200	36023600	0.83	100	106			chr12	57472400	57472800	0.2425	16	17
chr1	33399600	33400000	0.565	78	144			chr1	36106800	36107200	0.545	65	83			chr12	57632800	57633200	0.2075	15	17
chr1	33430400	33430800	0.8025	119	153			chr1	36107200	36107600	0.615	67	66			chr12	57848800	57849200	0.255	15	15
chr1	33502400	33502800	0.945	202	290			chr1	36184400	36184800	0.865	93	96			chr12	57852800	57853200	0.2525	16	15
chr1	33592800	33593200	0.89	168	249			chr1	36234800	36235200	0.6025	58	64			chr12	57881600	57882000	0.2525	17	18
chr1	33722400	33722800	0.5725	70	99			chr1	36235200	36235600	0.8875	95	89			chr12	57984800	57985200	0.27	17	15
chr1	33724400	33724800	0.5975	76	118			chr1	36335200	36335600	0.555	60	59			chr12	58146000	58146400	0.2675	16	17
chr1	33808000	33808400	0.6925	126	230			chr1	36347600	36348000	0.645	71	73			chr12	58165600	58166000	0.265	20	21
chr1	33812800	33813200	0.8025	98	98			chr1	36348400	36348800	0.5425	60	75			chr12	58176400	58176800	0.2575	22	23
chr1	33815600	33816000	0.86	147	163			chr1	36396400	36396800	0.7	71	65			chr12	58299200	58299600	0.2025	15	16
chr1	33938000	33938400	0.72	93	113			chr1	36396800	36397200	0.6975	73	71			chr12	62654000	62654400	0.29	22	23
chr1	35291200	35291600	0.475	62	84			chr1	36554400	36554800	0.8575	126	128			chr12	62996400	62996800	0.28	18	17
chr1	35318400	35318800	0.47	67	93			chr1	36614800	36615200	0.71	72	77			chr12	63328800	63329200	0.2725	22	24
chr1	35325200	35325600	0.8825	165	267			chr1	36615200	36615600	0.575	65	78			chr12	64616000	64616400	0.2475	19	20
chr1	35332000	35332400	0.61	72	79			chr1	36616400	36616800	0.67	57	58			chr12	65563200	65563600	0.2	16	18
chr1	35390400	35390800	0.185	49	384			chr1	36621200	36621600	0.6375	61	66			chr12	69080400	69080800	0.2475	20	23
chr1	35450800	35451200	0.69	86	90			chr1	36626400	36626800	0.5975	56	60			chr12	69202400	69202800	0.315	17	17
chr1	35497200	35497600	0.9075	131	160			chr1	36653600	36654000	0.5725	49	56			chr12	70290400	70290800	0.2725	17	17
chr1	35544800	35545200	0.855	105	114			chr1	36689200	36689600	0.655	60	64			chr12	72148400	72148800	0.265	16	17
chr1	35658400	35658800	0.7	127	203			chr1	36689600	36690000	0.79	83	94			chr12	72233200	72233600	0.27	19	19
chr1	35734000	35734400	0.655	74	92			chr1	36690000	36690400	0.89	94	92			chr12	72332400	72332800	0.21	17	18
chr1	36021600	36022000	0.425	56	78			chr1	36690400	36690800	0.62	51	57			chr12	75724000	75724400	0.2275	15	15
chr1	36022800	36023200	0.7825	89	98			chr1	36714000	36714400	0.745	89	91			chr12	79941200	79941600	0.3475	22	23
chr1	36023200	36023600	0.885	136	162			chr1	36786800	36787200	0.8825	108	113			chr12	82752000	82752400	0.3275	21	21
chr1	36106800	36107200	0.56	100	174			chr1	36787200	36787600	0.5225	67	74			chr12	85674000	85674400	0.2275	15	16
chr1	36234800	36235200	0.65	91	123			chr1	36837200	36837600	0.735	76	75			chr12	93323200	93323600	0.3575	22	20
chr1	36348400	36348800	0.355	57	96			chr1	36839200	36839600	0.4625	50	67			chr12	93861200	93861600	0.3675	23	19
chr1	36396400	36396800	0.77	78	87			chr1	36839600	36840000	0.5825	55	62			chr12	95467200	95467600	0.275	16	15
chr1	36396800	36397200	0.815	93	98			chr1	36840000	36840400	0.6575	57	59			chr12	95611200	95611600	0.2775	18	17
chr1	36554400	36554800	0.9575	217	284			chr1	36852000	36852400	0.855	131	181			chr12	95945200	95945600	0.2325	17	18
chr1	36614800	36615200	0.755	106	140			chr1	36852400	36852800	0.6825	74	85			chr12	96252400	96252800	0.2725	17	17
chr1	36615200	36615600	0.555	84	118			chr1	36863200	36863600	0.6875	84	110			chr12	98884800	98885200	0.2675	16	16
chr1	36653600	36654000	0.6	75	107			chr1	36864000	36864400	0.3475	44	79			chr12	98987200	98987600	0.265	16	17
chr1	36689600	36690000	0.8125	136	173			chr1	36929600	36930000	0.8675	108	137			chr12	104350800	104351200	0.2875	27	27
chr1	36690000	36690400	0.94	133	129			chr1	36930000	36930400	0.7525	87	90			chr12	104682400	104682800	0.2325	19	20
chr1	36705600	36706000	0.525	77	111			chr1	37945200	37945600	0.6875	71	83			chr12	104850400	104850800	0.2625	19	18
chr1	36714000	36714400	0.745	97	123			chr1	37980400	37980800	0.9125	109	104			chr12	105501200	105501600	0.29	18	18
chr1	36734800	36735200	0.3825	58	96			chr1	38019600	38020000	0.7425	89	103			chr12	108154800	108155200	0.2525	15	15
chr1	36735200	36735600	0.3625	55	101			chr1	38020000	38020400	0.7225	66	66			chr12	109125200	109125600	0.175	14	16
chr1	36772400	36772800	0.8675	115	134			chr1	38061200	38061600	0.6075	70	89			chr12	109490000	109490400	0.185	17	21
chr1	36789600	36790000	0.745	110	156			chr1	38156000	38156400	0.645	60	76			chr12	109531200	109531600	0.355	26	28
chr1	36850400	36850800	0.6725	83	105			chr1	38158000	38158400	0.8025	96	109			chr12	110010800	110011200	0.17	14	15
chr1	36852000	36852400	0.89	132	163			chr1	38230000	38230400	0.3625	54	82			chr12	110436800	110437200	0.29	20	21
chr1	36863200	36863600	0.7675	125	190			chr1	38273600	38274000	0.5575	51	57			chr12	110906000	110906400	0.3425	19	16
chr1	36866800	36867200	0.9425	152	167			chr1	38325200	38325600	0.73	79	81			chr12	110906800	110907200	0.155	14	17
chr1	36916000	36916400	0.6275	92	137			chr1	38325600	38326000	0.8925	92	98			chr12	110940000	110940400	0.2125	15	15
chr1	36929600	36930000	0.6725	109	191			chr1	38388400	38388800	0.4975	73	101			chr12	111325600	111326000	0.19	14	15
chr1	36930000	36930400	0.595	111	194			chr1	38412400	38412800	0.765	88	98			chr12	112279600	112280000	0.23	22	21
chr1	36952400	36952800	0.7325	133	306			chr1	38455600	38456000	0.8625	143	214			chr12	112546400	112546800	0.235	16	16
chr1	37940000	37940400	0.41	57	79			chr1	38465200	38465600	0.875	114	133			chr12	112563200	112563600	0.32	20	17
chr1	37945200	37945600	0.6875	104	177			chr1	38474800	38475200	0.5725	68	84			chr12	113623200	113623600	0.2525	16	15
chr1	37980400	37980800	0.9825	167	212			chr1	38475200	38475600	0.71	62	60			chr12	113683600	113684000	0.25	18	18
chr1	38000000	38000400	0.63	87	115			chr1	38478000	38478400	0.87	131	182			chr12	114025600	114026000	0.2925	17	16
chr1	38019600	38020000	0.815	110	147			chr1	38989200	38989600	0.5225	56	61			chr12	114404000	114404400	0.355	23	22
chr1	38061200	38061600	0.6225	111	175			chr1	39281600	39282000	0.83	126	152			chr12	117125600	117126000	0.1625	16	17
chr1	38156000	38156400	0.8375	119	148			chr1	39325200	39325600	0.3525	50	65			chr12	117176000	117176400	0.265	17	17
chr1	38158000	38158400	0.85	121	123			chr1	39325600	39326000	0.6575	66	64			chr12	117348400	117348800	0.2	13	15
chr1	38189200	38189600	0.5425	73	103			chr1	39338800	39339200	0.6925	59	57			chr12	118573600	118574000	0.2625	16	17
chr1	38230000	38230400	0.2875	53	379			chr1	39381200	39381600	0.565	75	96			chr12	118814000	118814400	0.3175	18	18
chr1	38273200	38273600	0.695	71	82			chr1	39456800	39457200	0.785	94	103			chr12	120242000	120242400	0.23	16	18
chr1	38325200	38325600	0.8425	119	134			chr1	39491600	39492000	0.7325	63	67			chr12	120524800	120525200	0.3775	28	26
chr1	38325600	38326000	0.7925	81	83			chr1	39492000	39492400	0.5675	55	57			chr12	120632400	120632800	0.285	19	15
chr1	38412400	38412800	0.69	90	114			chr1	39633600	39634000	0.74	101	138			chr12	120638800	120639200	0.3375	23	20
chr1	38455600	38456000	0.905	184	362			chr1	39851200	39851600	0.6825	68	71			chr12	120666800	120667200	0.2775	21	19
chr1	38478000	38478400	0.7425	146	320			chr1	39857600	39858000	0.65	69	80			chr12	120729600	120730000	0.285	17	15
chr1	38478400	38478800	0.66	78	86			chr1	39864400	39864800	0.595	70	79			chr12	120755200	120755600	0.2925	21	20
chr1	39325600	39326000	0.7475	86	88			chr1	40042400	40042800	0.6825	65	75			chr12	120868400	120868800	0.18	14	15
chr1	39338800	39339200	0.8175	104	121			chr1	40177200	40177600	0.7575	104	128			chr12	120884000	120884400	0.23	19	21
chr1	39434800	39435200	0.7225	110	211			chr1	40204400	40204800	0.65	69	72			chr12	120933600	120934000	0.2375	14	16
chr1	39456800	39457200	0.8325	124	176			chr1	40264800	40265200	0.7	97	119			chr12	120966800	120967200	0.2525	15	15
chr1	39491600	39492000	0.7	88	109			chr1	40348800	40349200	0.57	73	89			chr12	121124400	121124800	0.275	18	18
chr1	39492000	39492400	0.735	89	93			chr1	40358400	40358800	0.62	97	125			chr12	121454000	121454400	0.2175	13	15
chr1	39624400	39624800	0.7275	90	104			chr1	40364800	40365200	0.7625	82	90			chr12	121790000	121790400	0.2825	18	17
chr1	40318000	40318400	0.555	72	102			chr1	40367600	40368000	0.635	59	58			chr12	121837600	121838000	0.305	17	16
chr1	40348800	40349200	0.7125	111	167			chr1	40505600	40506000	0.91	120	130			chr12	122020400	122020800	0.2025	16	17
chr1	40368000	40368400	0.43	66	92			chr1	40506000	40506400	0.77	65	63			chr12	122232000	122232400	0.315	23	22
chr1	40505600	40506000	0.8625	91	99			chr1	40506400	40506800	0.67	60	59			chr12	122326400	122326800	0.3725	24	23
chr1	40506000	40506400	0.85	119	140			chr1	40523200	40523600	0.7125	92	142			chr12	122502000	122502400	0.255	17	17
chr1	40562800	40563200	0.79	145	209			chr1	40525200	40525600	0.515	51	60			chr12	122750800	122751200	0.305	21	23
chr1	40626800	40627200	0.7975	166	252			chr1	40525600	40526000	0.575	65	77			chr12	123237200	123237600	0.255	17	20
chr1	40723600	40724000	0.9775	186	279			chr1	40562800	40563200	0.6625	93	99			chr12	123356800	123357200	0.205	16	16
chr1	40780800	40781200	0.645	93	141			chr1	40626800	40627200	0.8375	105	115			chr12	123380400	123380800	0.235	17	18
chr1	40849600	40850000	0.555	77	107			chr1	40723200	40723600	0.495	51	58			chr12	123849600	123850000	0.2	14	15
chr1	40855600	40856000	0.765	106	114			chr1	40723600	40724000	0.94	140	162			chr12	124086400	124086800	0.26	18	18
chr1	40887200	40887600	0.5625	89	119			chr1	40780800	40781200	0.4725	56	66			chr12	124118000	124118400	0.28	19	19
chr1	40887600	40888000	0.895	139	144			chr1	40840000	40840400	0.61	81	115			chr12	125318400	125318800	0.2375	18	17
chr1	40915600	40916000	0.94	163	195			chr1	40849200	40849600	0.6975	57	63			chr12	131310800	131311200	0.175	18	19
chr1	40942800	40943200	0.8525	103	104			chr1	40866000	40866400	0.6325	73	75			chr12	132628800	132629200	0.2525	20	22
chr1	40974000	40974400	0.545	89	173			chr1	40915600	40916000	0.7525	80	78			chr12	133562800	133563200	0.255	17	18
chr1	40974400	40974800	0.755	129	163			chr1	40916400	40916800	0.615	59	67			chr12	133758000	133758400	0.2975	24	23
chr1	40997200	40997600	0.93	133	140			chr1	40997200	40997600	0.7875	80	85			chr13	21635600	21636000	0.235	18	18
chr1	41157200	41157600	0.8425	144	195			chr1	41099600	41100000	0.6725	66	74			chr13	21714400	21714800	0.2325	16	17
chr1	41157600	41158000	0.9175	150	196			chr1	41157200	41157600	0.78	115	155			chr13	21750400	21750800	0.23	14	15
chr1	41224400	41224800	0.6825	72	81			chr1	41157600	41158000	0.8725	108	106			chr13	21872000	21872400	0.2925	18	18
chr1	41328000	41328400	0.725	86	93			chr1	41174800	41175200	0.7725	80	85			chr13	22244800	22245200	0.1925	15	16
chr1	41385200	41385600	0.77	125	231			chr1	41240000	41240400	0.7	61	57			chr13	24463200	24463600	0.23	16	16
chr1	41405200	41405600	0.4375	74	126			chr1	41267600	41268000	0.545	55	60			chr13	25496800	25497200	0.25	16	15
chr1	41405600	41406000	0.235	37	78			chr1	41286400	41286800	0.5	74	131			chr13	30689200	30689600	0.2225	17	17
chr1	41445200	41445600	0.7125	82	100			chr1	41329600	41330000	0.8125	98	111			chr13	31191600	31192000	0.3475	24	23
chr1	41705600	41706000	0.6	80	106			chr1	41334000	41334400	0.6675	73	82			chr13	34116800	34117200	0.3025	18	16
chr1	42800800	42801200	0.65	123	292			chr1	41405200	41405600	0.47	54	61			chr13	34392000	34392400	0.2575	17	18
chr1	42922000	42922400	0.9525	157	175			chr1	41440400	41440800	0.24	42	63			chr13	37573200	37573600	0.2275	14	15
chr1	42928800	42929200	0.7525	91	92			chr1	41445200	41445600	0.6525	59	57			chr13	41706800	41707200	0.295	21	19
chr1	43123600	43124000	0.5625	82	111			chr1	41469200	41469600	0.5175	90	146			chr13	41768400	41768800	0.2525	15	15
chr1	43124000	43124400	0.8575	137	172			chr1	41626000	41626400	0.375	59	98			chr13	45694400	45694800	0.2225	14	15
chr1	43147600	43148000	0.685	111	155			chr1	41898400	41898800	0.625	58	57			chr13	45915200	45915600	0.235	17	16
chr1	43148800	43149200	0.6225	78	79			chr1	41962000	41962400	0.675	61	61			chr13	48669200	48669600	0.2275	17	17
chr1	43232400	43232800	0.7875	101	126			chr1	42347600	42348000	0.3725	66	102			chr13	49822000	49822400	0.265	17	17
chr1	43232800	43233200	0.845	113	136			chr1	42800800	42801200	0.6325	101	133			chr13	50018000	50018400	0.31	20	19
chr1	43312000	43312400	0.7	99	129			chr1	43123600	43124000	0.5425	74	70			chr13	51818000	51818400	0.255	18	18
chr1	43390000	43390400	0.895	148	173			chr1	43124000	43124400	0.8125	99	98			chr13	53226800	53227200	0.2225	15	16
chr1	43424400	43424800	0.8375	128	153			chr1	43147600	43148000	0.84	98	116			chr13	73356000	73356400	0.3	17	16
chr1	43474000	43474400	0.535	69	86			chr1	43148800	43149200	0.5625	64	68			chr13	76056400	76056800	0.24	16	15
chr1	43501600	43502000	0.8425	138	172			chr1	43232400	43232800	0.6225	54	62			chr13	76123200	76123600	0.1925	16	17
chr1	43504800	43505200	0.42	63	140			chr1	43232800	43233200	0.7525	65	63			chr13	77566000	77566400	0.2025	14	15
chr1	43637600	43638000	0.605	96	137			chr1	43282800	43283200	0.5425	64	70			chr13	77901200	77901600	0.2675	18	19
chr1	43672400	43672800	0.43	57	81			chr1	43284800	43285200	0.29	48	73			chr13	84456000	84456400	0.2075	14	16
chr1	43748000	43748400	0.5225	82	122			chr1	43290800	43291200	0.925	147	156			chr13	92001200	92001600	0.305	19	18
chr1	43814400	43814800	0.86	108	124			chr1	43312000	43312400	0.7	83	87			chr13	93886400	93886800	0.2875	19	22
chr1	43814800	43815200	0.8475	120	139			chr1	43312400	43312800	0.7725	65	66			chr13	100150800	100151200	0.3	17	16
chr1	43824400	43824800	0.7575	94	105			chr1	43390000	43390400	0.8125	95	101			chr13	100340000	100340400	0.2175	14	15
chr1	43833600	43834000	0.62	125	234			chr1	43390400	43390800	0.5875	57	65			chr13	100740800	100741200	0.2475	15	15
chr1	43834000	43834400	0.58	72	86			chr1	43402000	43402400	0.7425	101	115			chr13	103046800	103047200	0.2125	13	15
chr1	43855200	43855600	0.685	97	130			chr1	43407600	43408000	0.505	54	57			chr13	111267600	111268000	0.2525	16	16
chr1	43855600	43856000	0.7	107	140			chr1	43418000	43418400	0.435	53	71			chr13	111805600	111806000	0.23	16	17
chr1	44011200	44011600	0.3725	62	100			chr1	43424400	43424800	0.7175	74	69			chr13	113862800	113863200	0.2875	23	24
chr1	44011600	44012000	0.725	88	98			chr1	43428800	43429200	0.7025	80	110			chr13	113951200	113951600	0.3025	24	29
chr1	44014000	44014400	0.7975	129	281			chr1	43429200	43429600	0.785	108	143			chr13	115000000	115000400	0.16	15	16
chr1	44116000	44116400	0.68	116	181			chr1	43432800	43433200	0.75	94	95			chr14	20801200	20801600	0.2975	18	16
chr1	44172800	44173200	0.765	103	126			chr1	43637600	43638000	0.5875	65	72			chr14	20811600	20812000	0.2625	16	18
chr1	44173200	44173600	0.82	100	98			chr1	43796000	43796400	0.69	76	81			chr14	20923200	20923600	0.2925	20	20
chr1	44412000	44412400	0.805	146	222			chr1	43824000	43824400	0.7025	57	57			chr14	21560800	21561200	0.2225	19	19
chr1	44412400	44412800	0.945	160	188			chr1	43824400	43824800	0.6925	57	62			chr14	21572000	21572400	0.2675	15	15
chr1	44440400	44440800	0.9025	158	183			chr1	43832800	43833200	0.6225	58	60			chr14	21945200	21945600	0.2375	18	19
chr1	44457200	44457600	0.89	129	126			chr1	43833600	43834000	0.6725	73	71			chr14	22025600	22026000	0.265	16	16
chr1	44475200	44475600	0.6475	81	107			chr1	43834000	43834400	0.735	80	87			chr14	23938400	23938800	0.215	16	16
chr1	44678800	44679200	0.52	112	291			chr1	43855200	43855600	0.79	94	111			chr14	24584000	24584400	0.37	23	18
chr1	44679200	44679600	0.5475	67	82			chr1	43870800	43871200	0.4325	61	74			chr14	24610800	24611200	0.255	17	17
chr1	44749200	44749600	0.6875	120	209			chr1	43988400	43988800	0.6225	104	204			chr14	24630000	24630400	0.1275	17	18
chr1	44820800	44821200	0.7175	87	94			chr1	44116000	44116400	0.72	105	134			chr14	24658000	24658400	0.2975	26	28
chr1	44870800	44871200	0.84	112	126			chr1	44173200	44173600	0.84	91	85			chr14	24682400	24682800	0.2975	16	16
chr1	45097200	45097600	0.535	65	80			chr1	44300800	44301200	0.655	65	66			chr14	24685200	24685600	0.2875	21	21
chr1	45097600	45098000	0.725	81	91			chr1	44412000	44412400	0.8375	92	102			chr14	24711600	24712000	0.2875	15	15
chr1	45140000	45140400	0.8575	106	114			chr1	44412400	44412800	0.7675	91	91			chr14	24768800	24769200	0.1925	15	15
chr1	45147600	45148000	0.6075	104	187			chr1	44440400	44440800	0.8275	104	119			chr14	31889600	31890000	0.2225	18	15
chr1	45166800	45167200	0.51	58	89			chr1	44457200	44457600	0.815	91	83			chr14	31926400	31926800	0.2575	15	16
chr1	45187200	45187600	0.72	129	225			chr1	44495600	44496000	0.615	60	67			chr14	35451600	35452000	0.33	20	17
chr1	45196800	45197200	0.8675	112	115			chr1	44501600	44502000	0.8	129	240			chr14	35591200	35591600	0.235	16	16
chr1	45205200	45205600	0.925	155	177			chr1	44513600	44514000	0.7075	63	71			chr14	36004400	36004800	0.2575	16	15
chr1	45240800	45241200	0.48	81	127			chr1	44514000	44514400	0.5325	65	68			chr14	36789600	36790000	0.245	16	15
chr1	45241200	45241600	0.9025	169	218			chr1	44678800	44679200	0.62	109	193			chr14	45431200	45431600	0.315	20	19
chr1	45250000	45250400	0.5825	73	79			chr1	44756400	44756800	0.78	107	128			chr14	45553200	45553600	0.28	17	15
chr1	45252000	45252400	0.7075	84	85			chr1	44820800	44821200	0.7425	74	75			chr14	50100800	50101200	0.2475	17	18
chr1	45265200	45265600	0.28	64	108			chr1	44951200	44951600	0.47	73	116			chr14	50359600	50360000	0.2275	17	15
chr1	45265600	45266000	0.92	156	230			chr1	44997600	44998000	0.3325	53	89			chr14	51706800	51707200	0.21	15	15
chr1	45272800	45273200	0.5875	91	138			chr1	45097200	45097600	0.7075	72	83			chr14	53019200	53019600	0.19	13	15
chr1	45273200	45273600	0.965	153	170			chr1	45097600	45098000	0.775	97	98			chr14	54976400	54976800	0.255	15	15
chr1	45273600	45274000	0.7975	84	82			chr1	45103600	45104000	0.495	53	67			chr14	55494000	55494400	0.28	17	16
chr1	45285600	45286000	0.93	135	167			chr1	45140000	45140400	0.75	75	79			chr14	55518000	55518400	0.2325	19	19
chr1	45292000	45292400	0.63	91	128			chr1	45187200	45187600	0.875	172	275			chr14	55878400	55878800	0.295	20	18
chr1	45292400	45292800	0.85	92	99			chr1	45187600	45188000	0.8175	79	79			chr14	58711600	58712000	0.2925	20	16
chr1	45292800	45293200	0.7725	107	129			chr1	45196400	45196800	0.915	180	224			chr14	60558400	60558800	0.27	18	19
chr1	45452000	45452400	0.6325	133	299			chr1	45196800	45197200	0.8925	111	117			chr14	60715600	60716000	0.2575	16	15
chr1	45476800	45477200	0.71	78	94			chr1	45205200	45205600	0.8425	95	95			chr14	61201200	61201600	0.1925	16	18
chr1	45477600	45478000	0.705	90	124			chr1	45240800	45241200	0.925	116	133			chr14	61447600	61448000	0.305	21	20
chr1	45600000	45600400	0.425	68	125			chr1	45241200	45241600	0.785	108	120			chr14	65879200	65879600	0.285	17	19
chr1	45637600	45638000	0.2875	63	134			chr1	45265200	45265600	0.475	58	77			chr14	67826400	67826800	0.29	16	16
chr1	45671600	45672000	0.6	73	81			chr1	45265600	45266000	0.82	103	101			chr14	68283200	68283600	0.2925	18	15
chr1	45732000	45732400	0.515	60	84			chr1	45273200	45273600	0.96	162	187			chr14	69260000	69260400	0.305	17	17
chr1	45769600	45770000	0.98	171	240			chr1	45273600	45274000	0.76	76	83			chr14	69291600	69292000	0.2075	18	22
chr1	45801600	45802000	0.5575	64	79			chr1	45285200	45285600	0.8125	115	140			chr14	69618400	69618800	0.29	19	18
chr1	45805600	45806000	0.9925	188	236			chr1	45285600	45286000	0.9275	126	139			chr14	69658000	69658400	0.28	18	17
chr1	45956400	45956800	0.5375	75	105			chr1	45452000	45452400	0.6325	89	114			chr14	69865200	69865600	0.3025	20	18
chr1	45956800	45957200	0.8525	119	133			chr1	45476800	45477200	0.735	63	71			chr14	70014800	70015200	0.28	21	19
chr1	45965600	45966000	0.9525	154	182			chr1	45477600	45478000	0.69	62	74			chr14	70233600	70234000	0.2575	15	15
chr1	45966000	45966400	0.745	89	96			chr1	45478000	45478400	0.675	59	57			chr14	70826400	70826800	0.27	24	25
chr1	45987200	45987600	0.6175	128	335			chr1	45478400	45478800	0.8675	121	141			chr14	73925200	73925600	0.28	18	15
chr1	45987600	45988000	0.7175	120	165			chr1	45501200	45501600	0.3475	48	75			chr14	74318400	74318800	0.2075	13	15
chr1	46008400	46008800	0.305	61	133			chr1	45504800	45505200	0.4675	68	102			chr14	74353200	74353600	0.2375	14	15
chr1	46016400	46016800	0.975	202	278			chr1	45732000	45732400	0.7575	98	122			chr14	74793200	74793600	0.315	22	24
chr1	46049600	46050000	0.745	87	107			chr1	45768800	45769200	0.6125	67	75			chr14	74829200	74829600	0.13	15	16
chr1	46152000	46152400	0.7575	89	104			chr1	45769600	45770000	0.9275	137	152			chr14	75179600	75180000	0.2175	14	16
chr1	46152800	46153200	0.86	107	119			chr1	45805600	45806000	0.8175	96	103			chr14	75372400	75372800	0.1425	14	16
chr1	46153600	46154000	0.6	113	180			chr1	45956800	45957200	0.57	51	56			chr14	75469200	75469600	0.325	20	19
chr1	46216000	46216400	0.5425	90	136			chr1	45965600	45966000	0.6125	87	106			chr14	75643200	75643600	0.275	19	18
chr1	46216400	46216800	0.665	123	214			chr1	45987200	45987600	0.7675	108	144			chr14	75725600	75726000	0.2525	15	15
chr1	46337600	46338000	0.6275	89	160			chr1	45987600	45988000	0.7425	82	93			chr14	77390800	77391200	0.2675	18	16
chr1	46598400	46598800	0.9225	149	339			chr1	46016000	46016400	0.6625	71	89			chr14	77422800	77423200	0.29	18	17
chr1	46648800	46649200	0.6625	80	94			chr1	46016400	46016800	0.9275	105	106			chr14	77499200	77499600	0.3275	17	16
chr1	46713200	46713600	0.6725	96	168			chr1	46049600	46050000	0.8925	101	107			chr14	77564400	77564800	0.3225	20	20
chr1	46768800	46769200	0.665	75	88			chr1	46050000	46050400	0.6425	57	58			chr14	81636800	81637200	0.2275	15	16
chr1	46806400	46806800	0.7075	114	208			chr1	46152000	46152400	0.7025	56	57			chr14	81685600	81686000	0.355	20	19
chr1	46859600	46860000	0.32	79	224			chr1	46152400	46152800	0.9	102	106			chr14	81687600	81688000	0.3275	24	22
chr1	46867600	46868000	0.4575	64	95			chr1	46152800	46153200	0.8725	102	117			chr14	89017600	89018000	0.1725	16	19
chr1	47069600	47070000	0.765	109	147			chr1	46153600	46154000	0.7575	98	126			chr14	90422000	90422400	0.255	16	16
chr1	47184800	47185200	0.71	115	147			chr1	46216000	46216400	0.8975	92	92			chr14	90849600	90850000	0.2225	18	22
chr1	47201200	47201600	0.1525	39	122			chr1	46216400	46216800	0.8325	92	93			chr14	90863200	90863600	0.2575	20	20
chr1	47644800	47645200	0.7075	98	138			chr1	46219200	46219600	0.715	63	65			chr14	90866000	90866400	0.165	16	20
chr1	47658000	47658400	0.535	71	87			chr1	46268400	46268800	0.6575	66	72			chr14	91112400	91112800	0.2175	15	15
chr1	47658400	47658800	0.89	118	128			chr1	46598000	46598400	0.5675	58	60			chr14	91527200	91527600	0.2825	16	16
chr1	47779600	47780000	0.8425	98	110			chr1	46598400	46598800	0.85	128	145			chr14	92572800	92573200	0.2	15	15
chr1	47800000	47800400	0.825	101	109			chr1	46622000	46622400	0.495	53	76			chr14	93214800	93215200	0.2625	17	17
chr1	47845200	47845600	0.5	97	141			chr1	46622400	46622800	0.76	100	122			chr14	96000800	96001200	0.2325	15	15
chr1	47903200	47903600	0.7775	79	82			chr1	46624000	46624400	0.5975	86	144			chr14	96968400	96968800	0.3275	21	19
chr1	47943600	47944000	0.49	84	185			chr1	46645200	46645600	0.69	66	69			chr14	99947600	99948000	0.25	16	17
chr1	48285200	48285600	0.6025	75	106			chr1	46713200	46713600	0.5525	79	100			chr14	100029600	100030000	0.215	17	17
chr1	48303600	48304000	0.72	108	150			chr1	46768800	46769200	0.8175	102	120			chr14	100130400	100130800	0.18	15	16
chr1	48306400	48306800	0.44	69	93			chr1	46769200	46769600	0.7675	91	93			chr14	100842400	100842800	0.2075	14	15
chr1	48331600	48332000	0.6625	78	97			chr1	46806400	46806800	0.93	149	164			chr14	102414400	102414800	0.325	25	24
chr1	48332400	48332800	0.5675	84	137			chr1	46813600	46814000	0.6375	60	69			chr14	102780400	102780800	0.19	15	15
chr1	48332800	48333200	0.635	68	105			chr1	46886000	46886400	0.5125	60	62			chr14	102783200	102783600	0.245	16	16
chr1	48378800	48379200	0.665	101	175			chr1	46908000	46908400	0.66	93	113			chr14	102990800	102991200	0.25	16	17
chr1	48379200	48379600	0.51	72	90			chr1	46908400	46908800	0.8825	113	115			chr14	103995200	103995600	0.2525	19	16
chr1	48385200	48385600	0.5625	72	90			chr1	46988000	46988400	0.8	104	129			chr14	105219200	105219600	0.295	19	19
chr1	48688400	48688800	0.7575	105	113			chr1	46988400	46988800	0.51	52	66			chr14	105282400	105282800	0.2775	21	23
chr1	48996400	48996800	0.255	48	85			chr1	46993600	46994000	0.5825	61	71			chr14	105947200	105947600	0.1925	18	20
chr1	51425600	51426000	0.5775	83	128			chr1	47010400	47010800	0.57	80	126			chr15	26327200	26327600	0.26	15	15
chr1	51426000	51426400	0.54	84	135			chr1	47069600	47070000	0.65	71	84			chr15	31598800	31599200	0.2275	17	17
chr1	51433600	51434000	0.5325	83	124			chr1	47184800	47185200	0.6725	81	83			chr15	34394000	34394400	0.3075	21	19
chr1	51434000	51434400	0.835	128	158			chr1	47644800	47645200	0.6625	82	100			chr15	34502000	34502400	0.245	18	18
chr1	51701600	51702000	0.505	75	95			chr1	47646800	47647200	0.6075	102	224			chr15	34635200	34635600	0.345	24	25
chr1	52156400	52156800	0.63	88	135			chr1	47658400	47658800	0.505	53	63			chr15	35261600	35262000	0.1625	17	20
chr1	52195200	52195600	0.7325	99	109			chr1	47694800	47695200	0.65	58	61			chr15	35280400	35280800	0.295	20	19
chr1	52344000	52344400	0.5575	76	112			chr1	47697200	47697600	0.87	118	123			chr15	38746000	38746400	0.2	17	17
chr1	52344400	52344800	0.8675	132	150			chr1	47698000	47698400	0.755	107	156			chr15	40074800	40075200	0.25	17	15
chr1	52442800	52443200	0.35	61	94			chr1	47779600	47780000	0.8475	94	100			chr15	40179600	40180000	0.235	17	17
chr1	52499200	52499600	0.87	140	194			chr1	47780000	47780400	0.68	65	64			chr15	40395600	40396000	0.27	15	16
chr1	52503200	52503600	0.6675	113	235			chr1	47799200	47799600	0.7025	57	62			chr15	40660400	40660800	0.2575	17	17
chr1	52520800	52521200	0.97	178	190			chr1	47799600	47800000	0.735	64	65			chr15	40674800	40675200	0.28	17	18
chr1	52522000	52522400	0.895	129	135			chr1	47800400	47800800	0.6425	62	60			chr15	41186400	41186800	0.2825	18	18
chr1	52545600	52546000	0.4625	59	82			chr1	47801200	47801600	0.645	52	56			chr15	41694400	41694800	0.2425	18	19
chr1	52564000	52564400	0.36	62	100			chr1	47903200	47903600	0.5875	56	56			chr15	41954000	41954400	0.225	14	16
chr1	52607600	52608000	0.665	78	98			chr1	48387600	48388000	0.54	57	62			chr15	42349200	42349600	0.2825	18	16
chr1	52771200	52771600	0.5125	64	99			chr1	51186000	51186400	0.3275	46	70			chr15	42783200	42783600	0.2725	17	16
chr1	52831600	52832000	0.87	130	189			chr1	51339200	51339600	0.78	99	109			chr15	42840800	42841200	0.2125	17	16
chr1	52870000	52870400	0.83	127	158			chr1	51425600	51426000	0.5975	74	86			chr15	44084000	44084400	0.1675	14	15
chr1	53018400	53018800	0.8075	109	119			chr1	51426000	51426400	0.6625	92	91			chr15	44116800	44117200	0.2575	15	15
chr1	53019200	53019600	0.8275	109	150			chr1	51433600	51434000	0.5775	55	59			chr15	44955600	44956000	0.2125	14	15
chr1	53163600	53164000	0.7475	154	207			chr1	51434000	51434400	0.835	87	92			chr15	45879200	45879600	0.2075	17	17
chr1	53164000	53164400	0.625	97	135			chr1	51434400	51434800	0.78	70	71			chr15	49170000	49170400	0.235	14	15
chr1	53168800	53169200	0.815	140	272			chr1	51443200	51443600	0.72	61	59			chr15	49447600	49448000	0.24	16	17
chr1	53387200	53387600	0.8275	158	206			chr1	51701600	51702000	0.6475	74	87			chr15	49913200	49913600	0.1775	15	15
chr1	53392800	53393200	0.665	93	116			chr1	51750000	51750400	0.46	66	122			chr15	50296000	50296400	0.235	15	15
chr1	53480400	53480800	0.415	69	147			chr1	51762400	51762800	0.4375	52	59			chr15	50716400	50716800	0.2375	15	15
chr1	53490800	53491200	0.4975	73	119			chr1	51796800	51797200	0.4825	79	111			chr15	50978800	50979200	0.2675	18	15
chr1	53555200	53555600	0.6525	89	154			chr1	51797200	51797600	0.695	68	64			chr15	51973600	51974000	0.3275	23	21
chr1	53573200	53573600	0.365	66	173			chr1	51895600	51896000	0.6925	92	107			chr15	52311200	52311600	0.2525	15	16
chr1	53576800	53577200	0.7225	100	121			chr1	51983600	51984000	0.8375	121	136			chr15	53037600	53038000	0.245	15	15
chr1	53587200	53587600	0.635	107	184			chr1	51984800	51985200	0.49	55	56			chr15	55700400	55700800	0.295	18	16
chr1	53611600	53612000	0.945	150	181			chr1	51985200	51985600	0.7625	97	108			chr15	56538000	56538400	0.1775	14	17
chr1	53626400	53626800	0.26	61	148			chr1	51986000	51986400	0.645	81	95			chr15	57179200	57179600	0.3275	21	16
chr1	53626800	53627200	0.67	104	165			chr1	52082800	52083200	0.705	83	86			chr15	59063200	59063600	0.2325	15	15
chr1	53649200	53649600	0.8475	147	202			chr1	52088000	52088400	0.47	55	74			chr15	59397200	59397600	0.2675	17	15
chr1	53662400	53662800	0.765	78	78			chr1	52194800	52195200	0.6675	81	92			chr15	60771200	60771600	0.345	21	19
chr1	53686000	53686400	0.885	181	274			chr1	52344000	52344400	0.525	50	59			chr15	63796400	63796800	0.1525	16	19
chr1	53704000	53704400	0.7675	144	246			chr1	52344400	52344800	0.8175	83	87			chr15	64388000	64388400	0.255	19	20
chr1	53792000	53792400	0.8	98	97			chr1	52344800	52345200	0.74	76	79			chr15	64680000	64680400	0.125	13	15
chr1	54303600	54304000	0.565	80	109			chr1	52499200	52499600	0.8425	101	110			chr15	64752400	64752800	0.295	25	29
chr1	54304000	54304400	0.9575	196	289			chr1	52520800	52521200	0.805	78	81			chr15	65197600	65198000	0.215	16	16
chr1	54355200	54355600	0.72	90	100			chr1	52521200	52521600	0.6725	66	71			chr15	65707600	65708000	0.2725	18	19
chr1	54411200	54411600	0.6225	74	88			chr1	52522000	52522400	0.88	96	86			chr15	65903200	65903600	0.2375	20	21
chr1	54448000	54448400	0.49	73	89			chr1	52607600	52608000	0.6375	59	58			chr15	66154800	66155200	0.195	15	15
chr1	54482000	54482400	0.6	82	136			chr1	52796000	52796400	0.695	68	67			chr15	66648800	66649200	0.2575	16	16
chr1	54518800	54519200	0.8975	121	152			chr1	52831600	52832000	0.7575	83	99			chr15	66678800	66679200	0.2425	21	25
chr1	54546400	54546800	0.505	64	79			chr1	52869200	52869600	0.5525	58	64			chr15	66790000	66790400	0.275	16	16
chr1	54665600	54666000	0.8925	120	122			chr1	52870000	52870400	0.825	87	92			chr15	67546800	67547200	0.275	18	19
chr1	54954000	54954400	0.535	84	102			chr1	52870400	52870800	0.64	59	66			chr15	68852000	68852400	0.2325	17	15
chr1	55007600	55008000	0.635	78	82			chr1	53018400	53018800	0.895	113	121			chr15	70390000	70390400	0.27	17	17
chr1	55008000	55008400	0.825	100	103			chr1	53079600	53080000	0.5025	60	78			chr15	72410400	72410800	0.24	15	15
chr1	55181200	55181600	0.6	107	253			chr1	53163600	53164000	0.765	88	99			chr15	72523600	72524000	0.26	17	18
chr1	55230000	55230400	0.8425	114	137			chr1	53164000	53164400	0.74	66	69			chr15	72668000	72668400	0.1725	16	18
chr1	55326800	55327200	0.8725	129	135			chr1	53168800	53169200	0.75	83	96			chr15	73076000	73076400	0.31	21	17
chr1	55331200	55331600	0.6075	93	143			chr1	53192400	53192800	0.5575	65	82			chr15	73925600	73926000	0.2425	16	16
chr1	55333200	55333600	0.5525	109	214			chr1	53308400	53308800	0.8725	92	92			chr15	74495200	74495600	0.2625	18	18
chr1	55352800	55353200	0.775	133	158			chr1	53379200	53379600	0.3625	49	59			chr15	74753200	74753600	0.24	15	16
chr1	55354000	55354400	0.885	141	193			chr1	53480400	53480800	0.4775	59	69			chr15	75497200	75497600	0.15	16	18
chr1	55505200	55505600	0.9575	178	221			chr1	53662400	53662800	0.7725	72	73			chr15	75660800	75661200	0.2775	18	20
chr1	55680800	55681200	0.7025	104	144			chr1	53686000	53686400	0.8575	104	121			chr15	75932400	75932800	0.2675	16	16
chr1	55681200	55681600	0.76	92	84			chr1	53704000	53704400	0.695	91	112			chr15	76196000	76196400	0.3375	22	23
chr1	55894800	55895200	0.81	155	200			chr1	53790400	53790800	0.4775	50	56			chr15	76603600	76604000	0.285	20	19
chr1	55996400	55996800	0.5	85	139			chr1	53791600	53792000	0.69	66	71			chr15	77363200	77363600	0.265	17	18
chr1	56655600	56656000	0.5325	109	216			chr1	54304000	54304400	0.8925	142	175			chr15	77926000	77926400	0.255	17	16
chr1	56797600	56798000	0.72	108	142			chr1	54355200	54355600	0.77	65	71			chr15	83349200	83349600	0.26	17	15
chr1	56879200	56879600	0.37	59	85			chr1	54411200	54411600	0.5375	51	59			chr15	83680400	83680800	0.32	23	21
chr1	56880400	56880800	0.7225	137	229			chr1	54518800	54519200	0.755	81	93			chr15	85198000	85198400	0.2175	14	15
chr1	56914400	56914800	0.265	46	80			chr1	54665600	54666000	0.735	75	91			chr15	85259200	85259600	0.26	19	17
chr1	56926800	56927200	0.585	119	237			chr1	54738800	54739200	0.4775	50	59			chr15	85524400	85524800	0.1875	15	17
chr1	56960000	56960400	0.845	157	216			chr1	54841200	54841600	0.43	50	57			chr15	86383600	86384000	0.18	14	15
chr1	56974000	56974400	0.4025	92	291			chr1	54842800	54843200	0.7425	71	71			chr15	89164400	89164800	0.1875	14	15
chr1	57029200	57029600	0.45	59	85			chr1	54872000	54872400	0.5525	51	62			chr15	89182000	89182400	0.285	21	23
chr1	57035200	57035600	0.41	82	176			chr1	54873200	54873600	0.6475	70	74			chr15	89437600	89438000	0.2725	19	17
chr1	57044800	57045200	0.745	94	102			chr1	54874000	54874400	0.6125	63	71			chr15	89878000	89878400	0.2525	17	17
chr1	57154000	57154400	0.365	59	83			chr1	54930400	54930800	0.7675	108	135			chr15	89959600	89960000	0.25	18	18
chr1	57284400	57284800	0.51	92	163			chr1	54954000	54954400	0.7575	83	89			chr15	90039600	90040000	0.3175	19	17
chr1	57320000	57320400	0.345	59	95			chr1	54954800	54955200	0.505	47	56			chr15	90118400	90118800	0.32	19	15
chr1	57376000	57376400	0.3925	51	81			chr1	55181200	55181600	0.495	74	108			chr15	90437200	90437600	0.2975	23	24
chr1	57376400	57376800	0.5625	97	205			chr1	55230000	55230400	0.7125	70	75			chr15	91260400	91260800	0.235	14	15
chr1	57377200	57377600	0.435	63	82			chr1	55644800	55645200	0.5225	48	58			chr15	93352400	93352800	0.3075	20	21
chr1	57385200	57385600	0.275	52	91			chr1	55680800	55681200	0.7075	71	73			chr15	93374800	93375200	0.2875	20	20
chr1	57431600	57432000	0.65	80	107			chr1	56968400	56968800	0.71	61	61			chr15	100106000	100106400	0.21	15	15
chr1	57746000	57746400	0.605	97	236			chr1	57684400	57684800	0.61	75	102			chr15	100882000	100882400	0.2025	15	16
chr1	57930400	57930800	0.6775	91	106			chr1	57692800	57693200	0.3375	58	86			chr15	101609200	101609600	0.3775	22	21
chr1	59012400	59012800	0.4625	79	125			chr1	59012400	59012800	0.5075	56	64			chr16	146800	147200	0.21	15	18
chr1	59165600	59166000	0.8475	113	135			chr1	59165600	59166000	0.5975	65	69			chr16	231200	231600	0.225	15	15
chr1	59218400	59218800	0.595	77	80			chr1	59249600	59250000	0.7475	73	78			chr16	279200	279600	0.23	16	16
chr1	59221200	59221600	0.5675	83	128			chr1	59250000	59250400	0.765	81	83			chr16	740400	740800	0.1725	19	24
chr1	59249600	59250000	0.85	108	117			chr1	59280800	59281200	0.5125	69	85			chr16	790800	791200	0.2875	17	17
chr1	59250000	59250400	0.7175	84	95			chr1	59282000	59282400	0.8875	91	96			chr16	857600	858000	0.1825	14	16
chr1	59282000	59282400	0.8625	116	138			chr1	59347200	59347600	0.4925	69	96			chr16	1401600	1402000	0.1625	17	22
chr1	59347200	59347600	0.5725	107	229			chr1	59348800	59349200	0.525	53	68			chr16	1524800	1525200	0.185	17	17
chr1	59348800	59349200	0.8275	105	115			chr1	59349200	59349600	0.755	73	67			chr16	1979600	1980000	0.2075	13	15
chr1	59350800	59351200	0.4875	87	282			chr1	59349600	59350000	0.85	114	144			chr16	2014800	2015200	0.2025	15	15
chr1	59364800	59365200	0.92	162	198			chr1	59350800	59351200	0.8325	100	108			chr16	2022000	2022400	0.1725	17	18
chr1	59369200	59369600	0.5675	73	80			chr1	59362400	59362800	0.4725	56	75			chr16	2054000	2054400	0.2275	16	17
chr1	59369600	59370000	0.795	108	117			chr1	59364800	59365200	0.855	142	177			chr16	2097600	2098000	0.2175	15	17
chr1	59509600	59510000	0.425	62	105			chr1	59753600	59754000	0.315	43	60			chr16	2205200	2205600	0.2175	16	17
chr1	59518000	59518400	0.5775	109	183			chr1	59762400	59762800	0.71	65	65			chr16	2318000	2318400	0.2575	20	16
chr1	59669600	59670000	0.4575	58	81			chr1	61478800	61479200	0.4975	80	129			chr16	2390800	2391200	0.3	18	20
chr1	59680400	59680800	0.745	146	225			chr1	61514400	61514800	0.495	75	120			chr16	2563600	2564000	0.2075	16	15
chr1	59762000	59762400	0.465	69	107			chr1	61515600	61516000	0.7375	79	93			chr16	2653200	2653600	0.305	23	22
chr1	59762400	59762800	0.9	106	117			chr1	61523200	61523600	0.5425	59	59			chr16	2732400	2732800	0.2275	19	20
chr1	59977200	59977600	0.77	98	110			chr1	61542800	61543200	0.7525	75	83			chr16	2770800	2771200	0.19	14	15
chr1	59988800	59989200	0.6975	92	104			chr1	61545600	61546000	0.5675	75	92			chr16	3058400	3058800	0.3725	27	26
chr1	60022400	60022800	0.53	94	177			chr1	61607200	61607600	0.6525	63	69			chr16	3068000	3068400	0.2475	16	17
chr1	60196400	60196800	0.3675	62	90			chr1	61650000	61650400	0.6475	61	57			chr16	3074000	3074400	0.3	20	22
chr1	60280000	60280400	0.5325	65	78			chr1	61736800	61737200	0.5575	61	68			chr16	3109200	3109600	0.26	16	17
chr1	60280800	60281200	0.6925	88	94			chr1	62190400	62190800	0.49	53	65			chr16	3162400	3162800	0.155	15	17
chr1	60322400	60322800	0.69	92	128			chr1	62902400	62902800	0.735	68	76			chr16	3333200	3333600	0.32	21	17
chr1	60402000	60402400	0.43	60	78			chr1	63249600	63250000	0.8075	93	95			chr16	3550800	3551200	0.2375	17	20
chr1	61515600	61516000	0.71	105	125			chr1	63833200	63833600	0.69	66	67			chr16	4321200	4321600	0.29	18	17
chr1	61542400	61542800	0.4925	71	90			chr1	63988800	63989200	0.8775	142	168			chr16	4524400	4524800	0.2275	17	16
chr1	61542800	61543200	0.5375	94	162			chr1	65329600	65330000	0.64	85	124			chr16	4526000	4526400	0.185	14	15
chr1	61649200	61649600	0.8175	122	188			chr1	65364000	65364400	0.6925	61	61			chr16	4588800	4589200	0.2325	17	17
chr1	61803600	61804000	0.5325	77	92			chr1	65487600	65488000	0.4675	59	75			chr16	4666000	4666400	0.305	17	16
chr1	61804400	61804800	0.2625	46	83			chr1	65532400	65532800	0.7275	66	65			chr16	4897200	4897600	0.3	20	18
chr1	61918800	61919200	0.46	78	95			chr1	65533200	65533600	0.5625	54	63			chr16	5083600	5084000	0.1875	17	22
chr1	62190400	62190800	0.475	88	166			chr1	65696800	65697200	0.5825	83	118			chr16	5121600	5122000	0.275	20	21
chr1	62190800	62191200	0.8275	111	145			chr1	65743200	65743600	0.44	51	64			chr16	9146800	9147200	0.1575	15	15
chr1	62664400	62664800	0.26	44	84			chr1	65758800	65759200	0.81	116	145			chr16	9185200	9185600	0.1875	13	15
chr1	62703600	62704000	0.7825	122	158			chr1	65775600	65776000	0.545	57	66			chr16	10479600	10480000	0.205	14	16
chr1	62707200	62707600	0.555	74	126			chr1	65783600	65784000	0.5225	68	83			chr16	12009600	12010000	0.2275	17	17
chr1	62889600	62890000	0.83	145	233			chr1	65878000	65878400	0.6975	87	137			chr16	12897200	12897600	0.3075	26	29
chr1	62901600	62902000	0.6575	101	132			chr1	65886400	65886800	0.7875	82	83			chr16	14724000	14724400	0.295	17	15
chr1	62902400	62902800	0.99	154	172			chr1	65946800	65947200	0.6025	74	76			chr16	14726400	14726800	0.305	17	15
chr1	63087600	63088000	0.625	115	219			chr1	66004400	66004800	0.5025	52	62			chr16	19078800	19079200	0.2675	17	15
chr1	63154000	63154400	0.765	95	118			chr1	67224000	67224400	0.5375	73	96			chr16	19566400	19566800	0.2625	17	17
chr1	63199600	63200000	0.695	96	101			chr1	67382000	67382400	0.5425	69	93			chr16	19566800	19567200	0.26	16	15
chr1	63249600	63250000	0.795	115	146			chr1	67390800	67391200	0.8275	81	75			chr16	19960000	19960400	0.2425	18	20
chr1	63833200	63833600	0.785	116	150			chr1	67395600	67396000	0.625	65	75			chr16	20752800	20753200	0.185	13	15
chr1	63988800	63989200	0.885	176	295			chr1	67396000	67396400	0.7675	74	73			chr16	21566000	21566400	0.1425	12	16
chr1	64058800	64059200	0.895	95	105			chr1	67519600	67520000	0.7775	81	71			chr16	21610800	21611200	0.21	17	18
chr1	64059200	64059600	0.785	87	85			chr1	67526400	67526800	0.2725	44	63			chr16	22217200	22217600	0.2175	13	15
chr1	64106400	64106800	0.6525	68	78			chr1	67896000	67896400	0.745	68	70			chr16	22308400	22308800	0.3875	24	23
chr1	64140000	64140400	0.655	91	131			chr1	67896400	67896800	0.8725	90	86			chr16	23521600	23522000	0.225	15	15
chr1	64239600	64240000	0.7375	88	98			chr1	67944800	67945200	0.6875	85	90			chr16	23568400	23568800	0.3175	20	19
chr1	65376400	65376800	0.5375	73	106			chr1	68148400	68148800	0.6	58	57			chr16	23652400	23652800	0.2625	18	19
chr1	65381600	65382000	0.585	85	118			chr1	68150800	68151200	0.675	81	89			chr16	23690000	23690400	0.3025	18	18
chr1	65453200	65453600	0.735	94	129			chr1	68152400	68152800	0.7825	100	115			chr16	25962000	25962400	0.285	18	16
chr1	65613600	65614000	0.6075	66	78			chr1	68154400	68154800	0.9225	137	144			chr16	28223200	28223600	0.24	15	15
chr1	65624400	65624800	0.8125	89	97			chr1	68166400	68166800	0.5075	56	72			chr16	28857600	28858000	0.38	24	22
chr1	65731200	65731600	0.4225	65	88			chr1	68199600	68200000	0.84	101	107			chr16	28986000	28986400	0.225	14	17
chr1	65775200	65775600	0.175	34	134			chr1	68382000	68382400	0.5	54	61			chr16	29690800	29691200	0.2475	18	20
chr1	65775600	65776000	0.185	37	193			chr1	68388800	68389200	0.325	48	69			chr16	29721600	29722000	0.1775	15	15
chr1	65886400	65886800	0.89	152	196			chr1	68757600	68758000	0.325	48	60			chr16	29801600	29802000	0.25	18	18
chr1	65933200	65933600	0.44	74	124			chr1	68962400	68962800	0.6275	66	68			chr16	29816800	29817200	0.2675	18	16
chr1	65937200	65937600	0.4525	60	85			chr1	70005600	70006000	0.3725	52	77			chr16	29827200	29827600	0.35	21	19
chr1	65950000	65950400	0.4775	60	84			chr1	70507200	70507600	0.785	74	70			chr16	29874800	29875200	0.2225	14	15
chr1	66153600	66154000	0.6475	89	100			chr1	70671200	70671600	0.825	99	103			chr16	30366400	30366800	0.21	15	15
chr1	67009200	67009600	0.4825	73	117			chr1	70686800	70687200	0.475	62	76			chr16	30441600	30442000	0.215	17	16
chr1	67390800	67391200	0.9175	122	147			chr1	70687200	70687600	0.6725	57	56			chr16	30596800	30597200	0.185	18	18
chr1	67396000	67396400	0.845	118	109			chr1	70820400	70820800	0.9025	133	135			chr16	30621600	30622000	0.3	21	16
chr1	67519600	67520000	0.855	134	219			chr1	70876800	70877200	0.6925	66	72			chr16	30661600	30662000	0.23	14	15
chr1	67896000	67896400	0.8975	149	172			chr1	71141600	71142000	0.5425	77	112			chr16	30709200	30709600	0.2125	15	16
chr1	67896400	67896800	0.915	122	130			chr1	71546800	71547200	0.7625	79	80			chr16	30816800	30817200	0.2675	19	18
chr1	67966000	67966400	0.36	68	102			chr1	75198800	75199200	0.73	77	84			chr16	30825600	30826000	0.2575	17	15
chr1	68000400	68000800	0.7025	121	214			chr1	76138400	76138800	0.6025	73	89			chr16	30886400	30886800	0.235	18	18
chr1	68001200	68001600	0.2875	52	91			chr1	76172800	76173200	0.4	48	60			chr16	31044400	31044800	0.2575	16	17
chr1	68018000	68018400	0.505	83	123			chr1	76190400	76190800	0.6475	80	88			chr16	31153600	31154000	0.3075	19	17
chr1	68044400	68044800	0.2975	50	81			chr1	76250400	76250800	0.6375	61	63			chr16	53078000	53078400	0.2525	14	16
chr1	68150800	68151200	0.86	138	253			chr1	76251600	76252000	0.63	55	63			chr16	53088800	53089200	0.3025	22	23
chr1	68152000	68152400	0.915	108	114			chr1	76262400	76262800	0.56	60	62			chr16	53737600	53738000	0.245	17	17
chr1	68152400	68152800	0.44	65	84			chr1	78148400	78148800	0.685	60	68			chr16	56998400	56998800	0.16	14	15
chr1	68163200	68163600	0.3725	67	129			chr1	78148800	78149200	0.6125	67	78			chr16	57278800	57279200	0.2875	19	16
chr1	68166400	68166800	0.845	133	185			chr1	78225200	78225600	0.655	61	66			chr16	57334400	57334800	0.2125	14	15
chr1	68962400	68962800	0.61	91	118			chr1	78245200	78245600	0.6675	78	71			chr16	57481200	57481600	0.2625	17	17
chr1	70671200	70671600	0.98	203	283			chr1	78444800	78445200	0.7475	85	88			chr16	57496400	57496800	0.23	14	15
chr1	70686800	70687200	0.5175	105	160			chr1	78470000	78470400	0.835	120	166			chr16	58163200	58163600	0.2925	16	17
chr1	70687200	70687600	0.8025	99	104			chr1	84384400	84384800	0.3725	69	110			chr16	58545600	58546000	0.1275	14	15
chr1	70820000	70820400	0.69	80	90			chr1	84568800	84569200	0.4925	56	66			chr16	58549200	58549600	0.3275	19	16
chr1	70820400	70820800	0.9325	145	175			chr1	84569200	84569600	0.5525	59	71			chr16	58718400	58718800	0.23	19	21
chr1	70876400	70876800	0.7	98	120			chr1	84944800	84945200	0.8875	100	103			chr16	58768000	58768400	0.285	18	17
chr1	70876800	70877200	0.885	134	156			chr1	84972000	84972400	0.8625	108	115			chr16	66304400	66304800	0.3425	21	20
chr1	71546800	71547200	0.7	91	98			chr1	85086400	85086800	0.735	76	80			chr16	66642400	66642800	0.1875	15	15
chr1	72948800	72949200	0.4625	71	92			chr1	85154400	85154800	0.6925	91	108			chr16	67219200	67219600	0.1975	14	15
chr1	74663600	74664000	0.655	78	93			chr1	85156400	85156800	0.4675	55	60			chr16	67233200	67233600	0.16	13	15
chr1	75198800	75199200	0.9225	159	221			chr1	85690800	85691200	0.675	102	139			chr16	67260800	67261200	0.26	17	17
chr1	76190000	76190400	0.57	73	89			chr1	85725200	85725600	0.6525	58	65			chr16	67514800	67515200	0.2375	14	17
chr1	76190400	76190800	0.655	108	164			chr1	85742000	85742400	0.69	57	60			chr16	67596000	67596400	0.235	16	16
chr1	76191600	76192000	0.7725	93	107			chr1	85744400	85744800	0.5275	60	75			chr16	67840400	67840800	0.2725	16	15
chr1	76251600	76252000	0.77	125	184			chr1	86174000	86174400	0.73	71	69			chr16	67867600	67868000	0.24	17	16
chr1	77684800	77685200	0.56	91	131			chr1	86927200	86927600	0.655	113	184			chr16	67875600	67876000	0.2725	17	18
chr1	78148000	78148400	0.6275	78	83			chr1	87170000	87170400	0.6475	64	72			chr16	67880400	67880800	0.235	17	17
chr1	78148400	78148800	0.81	90	105			chr1	87241200	87241600	0.35	42	67			chr16	67906800	67907200	0.305	20	19
chr1	78149200	78149600	0.675	78	93			chr1	87379600	87380000	0.7675	71	70			chr16	68056800	68057200	0.2725	21	23
chr1	78225200	78225600	0.9	141	182			chr1	87646000	87646400	0.22	40	68			chr16	68554400	68554800	0.2	14	15
chr1	78245200	78245600	0.87	118	131			chr1	87901200	87901600	0.4025	54	74			chr16	69599600	69600000	0.1875	14	16
chr1	78444800	78445200	0.8325	118	144			chr1	89149600	89150000	0.6825	76	88			chr16	69788800	69789200	0.2225	18	17
chr1	78511600	78512000	0.875	142	156			chr1	89357200	89357600	0.63	88	102			chr16	69796000	69796400	0.1975	16	16
chr1	84543200	84543600	0.7675	77	80			chr1	89458400	89458800	0.605	56	57			chr16	70285600	70286000	0.24	17	18
chr1	84944800	84945200	0.9225	141	161			chr1	89458800	89459200	0.595	58	60			chr16	70323200	70323600	0.305	19	20
chr1	84970800	84971200	0.3775	65	98			chr1	89989600	89990000	0.5425	60	72			chr16	70415200	70415600	0.2825	20	17
chr1	84972000	84972400	0.87	96	97			chr1	89990000	89990400	0.8275	80	75			chr16	70473200	70473600	0.2275	15	15
chr1	85039600	85040000	0.7075	73	83			chr1	90011200	90011600	0.665	104	179			chr16	70834800	70835200	0.2325	16	16
chr1	85040000	85040400	0.3975	65	101			chr1	90289200	90289600	0.5625	67	84			chr16	71323200	71323600	0.21	15	15
chr1	85086400	85086800	0.6975	74	79			chr1	90344400	90344800	0.4475	54	71			chr16	71496000	71496400	0.2275	15	16
chr1	85186000	85186400	0.4475	74	99			chr1	90361600	90362000	0.655	88	118			chr16	71560000	71560400	0.2625	16	17
chr1	85725200	85725600	0.675	107	140			chr1	90372000	90372400	0.48	55	68			chr16	71842800	71843200	0.2275	14	15
chr1	85742000	85742400	0.915	128	145			chr1	90460400	90460800	0.8375	98	103			chr16	71929200	71929600	0.2975	18	16
chr1	85794800	85795200	0.57	101	173			chr1	91277200	91277600	0.6775	75	88			chr16	73104400	73104800	0.2225	14	15
chr1	86046800	86047200	0.525	66	91			chr1	91487600	91488000	0.8875	88	84			chr16	75498400	75498800	0.33	20	21
chr1	86174000	86174400	0.92	143	197			chr1	91870000	91870400	0.7575	72	65			chr16	75551200	75551600	0.2275	16	16
chr1	87170000	87170400	0.6825	105	138			chr1	91966400	91966800	0.73	66	59			chr16	77270000	77270400	0.2425	16	17
chr1	87170400	87170800	0.945	102	97			chr1	91966800	91967200	0.7275	78	79			chr16	78133200	78133600	0.3675	22	21
chr1	87240000	87240400	0.5575	65	83			chr1	92021600	92022000	0.585	54	67			chr16	81040800	81041200	0.3075	18	16
chr1	87258800	87259200	0.66	109	208			chr1	92171600	92172000	0.6225	79	94			chr16	81348400	81348800	0.3	21	19
chr1	87271600	87272000	0.6125	102	227			chr1	92172000	92172400	0.8175	89	98			chr16	81771600	81772000	0.2175	15	16
chr1	87289600	87290000	0.4075	63	101			chr1	92198000	92198400	0.865	123	144			chr16	84220400	84220800	0.245	18	15
chr1	88108400	88108800	0.595	90	118			chr1	92270400	92270800	0.4625	73	89			chr16	85450000	85450400	0.1675	13	15
chr1	88641200	88641600	0.46	66	114			chr1	92351600	92352000	0.57	55	56			chr16	85454400	85454800	0.22	16	18
chr1	88641600	88642000	0.7375	99	166			chr1	92912000	92912400	0.5225	70	87			chr16	86588800	86589200	0.255	17	15
chr1	88646000	88646400	0.325	65	114			chr1	93010400	93010800	0.5425	85	156			chr16	87425600	87426000	0.2925	16	17
chr1	89149600	89150000	0.6975	118	182			chr1	93250800	93251200	0.5825	51	61			chr16	87812800	87813200	0.2525	20	19
chr1	89357200	89357600	0.7025	113	202			chr1	93258000	93258400	0.6125	51	56			chr16	87984400	87984800	0.26	17	19
chr1	89401200	89401600	0.54	69	101			chr1	93270400	93270800	0.555	67	84			chr16	88923200	88923600	0.2425	16	16
chr1	89458000	89458400	0.495	81	105			chr1	93297600	93298000	0.915	132	148			chr16	89357200	89357600	0.2425	17	18
chr1	89458400	89458800	0.6625	91	94			chr1	93422400	93422800	0.245	40	64			chr16	89766400	89766800	0.25	20	21
chr1	89989600	89990000	0.4175	62	83			chr1	93544400	93544800	0.565	94	161			chr17	900000	900400	0.2775	20	19
chr1	89990000	89990400	0.8625	111	120			chr1	93544800	93545200	0.6675	79	80			chr17	1303200	1303600	0.29	16	15
chr1	90058400	90058800	0.6225	71	103			chr1	93646000	93646400	0.8125	79	81			chr17	1588000	1588400	0.225	13	15
chr1	90286400	90286800	0.7375	95	123			chr1	93811200	93811600	0.89	106	118			chr17	1945200	1945600	0.2575	15	15
chr1	90287200	90287600	0.81	84	85			chr1	94032800	94033200	0.575	82	115			chr17	2239600	2240000	0.2725	17	17
chr1	90292000	90292400	0.36	59	82			chr1	94033200	94033600	0.51	53	57			chr17	2304800	2305200	0.2675	15	15
chr1	90408400	90408800	0.8675	128	143			chr1	94130000	94130400	0.72	78	74			chr17	3626800	3627200	0.245	18	19
chr1	90460400	90460800	0.7925	137	211			chr1	94312800	94313200	0.75	68	71			chr17	4046800	4047200	0.23	15	15
chr1	90460800	90461200	0.6975	84	100			chr1	94313200	94313600	0.6825	55	58			chr17	4316400	4316800	0.22	14	15
chr1	91487600	91488000	0.9575	196	274			chr1	94344400	94344800	0.5525	52	64			chr17	4634800	4635200	0.2125	15	15
chr1	92292800	92293200	0.6425	74	82			chr1	94374800	94375200	0.6925	64	73			chr17	5095200	5095600	0.2275	16	16
chr1	92293200	92293600	0.8775	109	113			chr1	95100400	95100800	0.285	43	61			chr17	5342400	5342800	0.3275	22	20
chr1	92351600	92352000	0.8475	146	196			chr1	95538400	95538800	0.85	94	92			chr17	5372000	5372400	0.18	14	15
chr1	92546000	92546400	0.7175	78	80			chr1	95550000	95550400	0.7725	73	67			chr17	6915600	6916000	0.335	23	19
chr1	92764400	92764800	0.9375	153	172			chr1	95581200	95581600	0.51	53	61			chr17	7077600	7078000	0.2575	16	15
chr1	92907200	92907600	0.65	124	189			chr1	95645200	95645600	0.505	54	71			chr17	7117200	7117600	0.2725	16	16
chr1	92907600	92908000	0.5025	91	133			chr1	95699600	95700000	0.7725	79	89			chr17	7137600	7138000	0.2275	18	18
chr1	92951200	92951600	0.7925	90	102			chr1	100065200	100065600	0.6425	87	120			chr17	7146000	7146400	0.23	17	18
chr1	92952400	92952800	0.56	98	139			chr1	100232000	100232400	0.5	48	56			chr17	7184000	7184400	0.2225	15	15
chr1	92970800	92971200	0.7975	89	89			chr1	100237200	100237600	0.515	53	66			chr17	7199600	7200000	0.2425	19	19
chr1	93250400	93250800	0.69	81	90			chr1	100315600	100316000	0.7575	87	80			chr17	7340400	7340800	0.22	16	16
chr1	93250800	93251200	0.56	104	335			chr1	100435200	100435600	0.6125	76	105			chr17	7387600	7388000	0.265	18	17
chr1	93297200	93297600	0.385	63	101			chr1	100503600	100504000	0.6725	64	62			chr17	7475600	7476000	0.195	15	15
chr1	93297600	93298000	0.93	222	295			chr1	100598400	100598800	0.945	129	132			chr17	7589200	7589600	0.3325	19	16
chr1	93352400	93352800	0.56	87	118			chr1	100715200	100715600	0.6525	69	71			chr17	7590800	7591200	0.2325	16	16
chr1	93416800	93417200	0.6225	86	126			chr1	100731600	100732000	0.7	70	72			chr17	7620400	7620800	0.2525	17	17
chr1	93426000	93426400	0.7	79	86			chr1	100812800	100813200	0.5625	66	89			chr17	7740000	7740400	0.31	22	24
chr1	93427200	93427600	0.85	97	95			chr1	100816800	100817200	0.775	81	81			chr17	8042000	8042400	0.24	15	15
chr1	93544400	93544800	0.505	124	411			chr1	100828400	100828800	0.75	72	71			chr17	8057600	8058000	0.2675	17	15
chr1	93544800	93545200	0.595	90	119			chr1	100905600	100906000	0.3125	45	59			chr17	8059600	8060000	0.26	15	15
chr1	93645600	93646000	0.98	160	177			chr1	101251200	101251600	0.3725	48	66			chr17	8076800	8077200	0.2275	18	18
chr1	93646000	93646400	0.8525	121	135			chr1	101491200	101491600	0.67	72	82			chr17	8152400	8152800	0.2225	17	18
chr1	93694400	93694800	0.86	103	108			chr1	101537200	101537600	0.6175	66	75			chr17	8286400	8286800	0.325	20	19
chr1	93811200	93811600	0.8875	178	306			chr1	101594000	101594400	0.5925	67	73			chr17	8534400	8534800	0.205	17	16
chr1	93913600	93914000	0.715	79	88			chr1	101749200	101749600	0.3575	44	57			chr17	12921200	12921600	0.26	15	15
chr1	94050800	94051200	0.6425	87	105			chr1	104068400	104068800	0.7325	67	57			chr17	14204000	14204400	0.25	14	15
chr1	94057200	94057600	0.52	73	102			chr1	107599200	107599600	0.6675	66	69			chr17	14212400	14212800	0.185	13	15
chr1	94057600	94058000	0.9275	138	167			chr1	108559200	108559600	0.3325	57	120			chr17	16120400	16120800	0.2625	26	26
chr1	94080800	94081200	0.91	97	106			chr1	108622400	108622800	0.3125	43	62			chr17	16284000	16284400	0.2475	16	15
chr1	94081200	94081600	0.525	72	99			chr1	108742400	108742800	0.61	61	70			chr17	16342000	16342400	0.265	16	16
chr1	94083200	94083600	0.8825	137	166			chr1	109047600	109048000	0.375	57	79			chr17	17494800	17495200	0.2475	15	17
chr1	94083600	94084000	0.795	109	132			chr1	109076400	109076800	0.405	76	125			chr17	17653200	17653600	0.1675	15	16
chr1	94224400	94224800	0.7275	118	179			chr1	109102400	109102800	0.725	74	78			chr17	17739600	17740000	0.3325	22	18
chr1	94279600	94280000	0.3125	55	99			chr1	109234800	109235200	0.81	94	97			chr17	17942400	17942800	0.365	23	24
chr1	94293600	94294000	0.635	101	175			chr1	109288800	109289200	0.67	96	113			chr17	17990800	17991200	0.1425	14	16
chr1	94311600	94312000	0.54	63	84			chr1	109289200	109289600	0.8275	99	106			chr17	19552000	19552400	0.3375	22	18
chr1	94312800	94313200	0.9	154	187			chr1	109419600	109420000	0.7625	81	87			chr17	19881200	19881600	0.28	18	15
chr1	94344400	94344800	0.575	98	165			chr1	109505600	109506000	0.6775	68	76			chr17	19896000	19896400	0.25	16	17
chr1	94344800	94345200	0.605	94	131			chr1	109506000	109506400	0.6875	72	76			chr17	25603600	25604000	0.2575	16	16
chr1	94375200	94375600	0.5975	73	87			chr1	109584400	109584800	0.7975	82	87			chr17	26662400	26662800	0.22	18	18
chr1	94430400	94430800	0.3975	53	89			chr1	109618400	109618800	0.6975	95	112			chr17	26684400	26684800	0.2825	17	16
chr1	94445200	94445600	0.4075	71	143			chr1	109632000	109632400	0.6825	75	75			chr17	26708400	26708800	0.27	16	15
chr1	94509600	94510000	0.3525	54	78			chr1	109633200	109633600	0.8825	139	147			chr17	27046800	27047200	0.3575	20	21
chr1	94534400	94534800	0.6025	78	96			chr1	109642400	109642800	0.4175	55	70			chr17	27054000	27054400	0.24	17	15
chr1	94582000	94582400	0.64	91	132			chr1	109642800	109643200	0.9225	155	188			chr17	27077200	27077600	0.18	15	15
chr1	94591600	94592000	0.7925	103	131			chr1	109677200	109677600	0.42	59	87			chr17	27230000	27230400	0.275	20	19
chr1	94776000	94776400	0.705	85	109			chr1	109740000	109740400	0.715	59	63			chr17	27940400	27940800	0.35	23	23
chr1	94849600	94850000	0.695	112	173			chr1	109756400	109756800	0.665	54	57			chr17	28443600	28444000	0.22	15	15
chr1	94883600	94884000	0.9325	144	194			chr1	109757200	109757600	0.39	52	68			chr17	29233200	29233600	0.3025	26	26
chr1	94884000	94884400	0.815	95	88			chr1	109757600	109758000	0.49	57	65			chr17	30669200	30669600	0.1375	18	19
chr1	94891200	94891600	0.2825	59	116			chr1	109761200	109761600	0.41	47	59			chr17	30771200	30771600	0.2825	19	21
chr1	95006800	95007200	0.84	84	81			chr1	109806000	109806400	0.2625	44	61			chr17	33288400	33288800	0.2625	16	16
chr1	95285600	95286000	0.5375	74	84			chr1	109825600	109826000	0.6775	77	86			chr17	33307200	33307600	0.2	15	17
chr1	95392400	95392800	0.7525	115	151			chr1	109826000	109826400	0.8075	83	87			chr17	33469200	33469600	0.2525	19	20
chr1	95428400	95428800	0.505	88	150			chr1	109841200	109841600	0.6125	54	64			chr17	33760400	33760800	0.22	18	16
chr1	95479600	95480000	0.3975	63	106			chr1	109850000	109850400	0.77	79	77			chr17	33914000	33914400	0.21	17	18
chr1	95532800	95533200	0.3225	63	117			chr1	109932400	109932800	0.81	96	109			chr17	34091200	34091600	0.2675	17	16
chr1	95538400	95538800	0.92	147	186			chr1	109935600	109936000	0.735	67	65			chr17	34838800	34839200	0.2475	16	16
chr1	95581200	95581600	0.2825	46	79			chr1	109968800	109969200	0.885	97	96			chr17	34891200	34891600	0.21	15	15
chr1	95587600	95588000	0.58	95	126			chr1	110026400	110026800	0.6425	55	57			chr17	35306000	35306400	0.295	17	16
chr1	95588000	95588400	0.5225	94	147			chr1	110026800	110027200	0.8075	119	146			chr17	35969200	35969600	0.22	14	17
chr1	95699600	95700000	0.8575	152	187			chr1	110036400	110036800	0.5275	72	88			chr17	36665600	36666000	0.205	15	16
chr1	97097600	97098000	0.665	94	115			chr1	110036800	110037200	0.575	62	66			chr17	36754800	36755200	0.2475	18	18
chr1	98513600	98514000	0.1675	34	86			chr1	110090800	110091200	0.435	47	56			chr17	36819200	36819600	0.1425	12	15
chr1	99127200	99127600	0.6675	74	86			chr1	110091200	110091600	0.78	84	81			chr17	36956000	36956400	0.29	17	18
chr1	99127600	99128000	0.53	66	83			chr1	110162000	110162400	0.685	69	82			chr17	36981600	36982000	0.265	21	21
chr1	100032000	100032400	0.43	72	100			chr1	110198400	110198800	0.4875	56	64			chr17	37010000	37010400	0.2375	16	16
chr1	100054800	100055200	0.8275	118	135			chr1	110262000	110262400	0.7025	76	74			chr17	37396000	37396400	0.2075	16	15
chr1	100315200	100315600	0.5025	61	80			chr1	110268000	110268400	0.305	46	59			chr17	38020400	38020800	0.24	19	20
chr1	100315600	100316000	0.8875	167	216			chr1	110361200	110361600	0.69	59	60			chr17	38083600	38084000	0.245	18	17
chr1	100435200	100435600	0.705	140	378			chr1	110364800	110365200	0.87	93	84			chr17	38136800	38137200	0.3575	21	21
chr1	100435600	100436000	0.53	71	102			chr1	110365200	110365600	0.455	53	64			chr17	38256800	38257200	0.305	18	18
chr1	100503600	100504000	0.8875	134	152			chr1	110366400	110366800	0.7325	88	103			chr17	38269600	38270000	0.24	15	16
chr1	100598400	100598800	0.995	198	228			chr1	110369600	110370000	0.615	78	106			chr17	39845600	39846000	0.3125	18	16
chr1	100715200	100715600	0.84	124	162			chr1	110438400	110438800	0.7275	89	102			chr17	39894400	39894800	0.2	14	15
chr1	100731600	100732000	0.865	129	142			chr1	110444400	110444800	0.53	50	57			chr17	40540400	40540800	0.1975	17	17
chr1	100816800	100817200	0.8225	82	83			chr1	110453200	110453600	0.64	57	59			chr17	40540800	40541200	0.2275	18	21
chr1	100951200	100951600	0.42	66	113			chr1	110460800	110461200	0.825	109	143			chr17	40714000	40714400	0.2775	18	16
chr1	100981200	100981600	0.3075	51	96			chr1	110522400	110522800	0.4575	60	82			chr17	40831600	40832000	0.2475	19	20
chr1	101360400	101360800	0.8125	101	103			chr1	110527200	110527600	0.8775	105	119			chr17	40925200	40925600	0.1925	15	17
chr1	101361600	101362000	0.715	84	90			chr1	110546400	110546800	0.675	65	71			chr17	41116400	41116800	0.205	15	15
chr1	101469600	101470000	0.275	54	114			chr1	110574000	110574400	0.4975	68	119			chr17	41150000	41150400	0.2575	19	20
chr1	101491200	101491600	0.7225	151	179			chr1	110576800	110577200	0.5375	68	88			chr17	41176400	41176800	0.2125	14	15
chr1	101723600	101724000	0.5525	70	87			chr1	110880800	110881200	0.86	111	139			chr17	41561200	41561600	0.21	15	15
chr1	101757200	101757600	0.395	56	80			chr1	110881200	110881600	0.7125	77	85			chr17	41608000	41608400	0.2375	18	17
chr1	104068400	104068800	0.6	73	78			chr1	110881600	110882000	0.6475	62	65			chr17	41755200	41755600	0.1925	14	15
chr1	106175600	106176000	0.5475	88	121			chr1	110882000	110882400	0.8325	75	73			chr17	41855600	41856000	0.245	17	17
chr1	107599200	107599600	0.8625	104	111			chr1	110950000	110950400	0.59	79	96			chr17	42015600	42016000	0.155	13	15
chr1	108069200	108069600	0.67	96	141			chr1	110950400	110950800	0.6825	85	94			chr17	42092000	42092400	0.23	19	23
chr1	108140000	108140400	0.53	68	82			chr1	111422400	111422800	0.7425	88	113			chr17	42148000	42148400	0.245	21	20
chr1	108225600	108226000	0.41	75	108			chr1	111423600	111424000	0.6475	74	100			chr17	42287600	42288000	0.32	22	22
chr1	109189600	109190000	0.35	53	98			chr1	111433200	111433600	0.605	60	63			chr17	42422400	42422800	0.2675	20	20
chr1	109234800	109235200	0.9475	175	215			chr1	111459600	111460000	0.75	82	82			chr17	42610800	42611200	0.205	15	18
chr1	109288800	109289200	0.42	75	113			chr1	111505600	111506000	0.5775	64	76			chr17	42617200	42617600	0.2175	18	21
chr1	109289200	109289600	0.9175	137	182			chr1	111506400	111506800	0.805	89	95			chr17	42619200	42619600	0.1825	13	15
chr1	109419600	109420000	0.775	104	110			chr1	111506800	111507200	0.8	90	93			chr17	42620400	42620800	0.1475	13	15
chr1	109505600	109506000	0.5775	82	117			chr1	111682800	111683200	0.7625	70	74			chr17	43138400	43138800	0.22	17	18
chr1	109506000	109506400	0.575	92	136			chr1	111704400	111704800	0.3975	68	128			chr17	43212800	43213200	0.285	18	20
chr1	109584400	109584800	0.8225	94	105			chr1	111992000	111992400	0.75	70	73			chr17	43225200	43225600	0.195	14	15
chr1	109618400	109618800	0.6875	126	209			chr1	112050400	112050800	0.78	83	76			chr17	43225600	43226000	0.24	16	16
chr1	109632000	109632400	0.5775	73	111			chr1	112050800	112051200	0.6	57	58			chr17	43238800	43239200	0.35	22	21
chr1	109633200	109633600	0.9	171	281			chr1	112142400	112142800	0.55	63	69			chr17	43275200	43275600	0.3425	23	22
chr1	109642400	109642800	0.4175	75	123			chr1	112203200	112203600	0.51	52	66			chr17	43472400	43472800	0.26	17	18
chr1	109642800	109643200	0.9575	202	265			chr1	112290000	112290400	0.455	63	66			chr17	44270000	44270400	0.1775	14	16
chr1	109699600	109700000	0.7875	91	97			chr1	112298000	112298400	0.8225	86	91			chr17	44271200	44271600	0.2425	17	18
chr1	109724000	109724400	0.7	83	100			chr1	112298400	112298800	0.805	101	115			chr17	45144800	45145200	0.265	20	21
chr1	109756400	109756800	0.78	85	88			chr1	113008800	113009200	0.5675	66	75			chr17	45918400	45918800	0.2625	15	16
chr1	109806000	109806400	0.24	50	113			chr1	113161600	113162000	0.6525	55	60			chr17	46125200	46125600	0.3075	21	19
chr1	109806400	109806800	0.435	79	139			chr1	113162000	113162400	0.62	70	87			chr17	46133200	46133600	0.24	18	18
chr1	109817200	109817600	0.73	105	167			chr1	113162400	113162800	0.8425	93	94			chr17	47022000	47022400	0.22	17	17
chr1	109820000	109820400	0.565	85	147			chr1	113216800	113217200	0.5275	51	59			chr17	47633600	47634000	0.1975	17	17
chr1	109825600	109826000	0.8175	115	154			chr1	113217200	113217600	0.755	76	73			chr17	47785600	47786000	0.1825	14	15
chr1	109826000	109826400	0.7225	93	106			chr1	113243200	113243600	0.86	124	143			chr17	48238800	48239200	0.23	15	15
chr1	109841200	109841600	0.445	72	129			chr1	113243600	113244000	0.65	59	60			chr17	48474800	48475200	0.2375	16	16
chr1	109842000	109842400	0.8775	124	155			chr1	113247600	113248000	0.805	91	86			chr17	48556000	48556400	0.2375	17	16
chr1	109935600	109936000	0.7975	150	208			chr1	113250000	113250400	0.5425	52	59			chr17	48628000	48628400	0.1675	16	17
chr1	109968800	109969200	0.9	118	126			chr1	113334800	113335200	0.47	50	58			chr17	48944800	48945200	0.3125	17	15
chr1	109969200	109969600	0.775	108	135			chr1	113361600	113362000	0.515	68	82			chr17	49124000	49124400	0.25	15	17
chr1	110026800	110027200	0.6625	105	160			chr1	113423600	113424000	0.655	77	89			chr17	49230800	49231200	0.365	31	30
chr1	110036400	110036800	0.6125	109	181			chr1	113444800	113445200	0.365	52	78			chr17	49337600	49338000	0.305	17	17
chr1	110036800	110037200	0.5825	68	86			chr1	113446800	113447200	0.83	88	92			chr17	53315600	53316000	0.2475	15	15
chr1	110090800	110091200	0.3275	55	80			chr1	113478400	113478800	0.73	89	92			chr17	55927200	55927600	0.295	18	21
chr1	110091200	110091600	0.7375	107	143			chr1	113498400	113498800	0.905	115	124			chr17	56084400	56084800	0.2325	18	18
chr1	110162400	110162800	0.7575	92	101			chr1	113498800	113499200	0.7375	84	91			chr17	56296400	56296800	0.32	18	16
chr1	110198400	110198800	0.5125	87	129			chr1	113582800	113583200	0.4	69	101			chr17	56494800	56495200	0.24	18	19
chr1	110198800	110199200	0.69	100	115			chr1	113585200	113585600	0.4875	54	67			chr17	57232400	57232800	0.2325	15	16
chr1	110282800	110283200	0.895	106	107			chr1	113614800	113615200	0.765	79	86			chr17	57287200	57287600	0.235	17	18
chr1	110306400	110306800	0.935	149	196			chr1	113615200	113615600	0.7625	71	75			chr17	57642800	57643200	0.31	22	21
chr1	110366400	110366800	0.5225	86	128			chr1	113615600	113616000	0.7475	65	66			chr17	57696800	57697200	0.3175	25	23
chr1	110420000	110420400	0.615	68	82			chr1	113616000	113616400	0.6725	67	78			chr17	58217200	58217600	0.1525	13	15
chr1	110425200	110425600	0.8	119	170			chr1	113683600	113684000	0.5775	52	60			chr17	61678000	61678400	0.2425	22	24
chr1	110438400	110438800	0.645	98	164			chr1	113684400	113684800	0.4875	57	76			chr17	61850800	61851200	0.2775	16	15
chr1	110478000	110478400	0.7625	103	121			chr1	114220000	114220400	0.5925	62	68			chr17	61851200	61851600	0.2525	16	17
chr1	110503200	110503600	0.495	74	103			chr1	114301600	114302000	0.665	61	62			chr17	61920000	61920400	0.3	27	28
chr1	110504000	110504400	0.39	59	83			chr1	114302000	114302400	0.855	93	89			chr17	62103200	62103600	0.135	14	15
chr1	110527200	110527600	0.9725	191	265			chr1	114302400	114302800	0.6825	59	61			chr17	62223200	62223600	0.32	21	19
chr1	110577200	110577600	0.8125	78	79			chr1	114354800	114355200	0.7875	96	109			chr17	62502800	62503200	0.3	22	20
chr1	110880800	110881200	0.795	126	171			chr1	114355200	114355600	0.745	78	76			chr17	62915600	62916000	0.2	16	17
chr1	110881200	110881600	0.8425	114	137			chr1	114447600	114448000	0.7575	104	142			chr17	65713600	65714000	0.2475	18	17
chr1	110882000	110882400	0.795	94	93			chr1	114456800	114457200	0.51	76	152			chr17	65821200	65821600	0.2425	17	17
chr1	110950000	110950400	0.7125	159	282			chr1	114472000	114472400	0.805	107	129			chr17	65970800	65971200	0.3025	18	18
chr1	110950400	110950800	0.61	85	122			chr1	114491600	114492000	0.5975	55	59			chr17	66016000	66016400	0.31	20	20
chr1	111289200	111289600	0.24	43	80			chr1	114889200	114889600	0.58	80	103			chr17	66031600	66032000	0.275	17	16
chr1	111505600	111506000	0.33	60	96			chr1	114922400	114922800	0.26	46	89			chr17	66730000	66730400	0.245	16	15
chr1	111506400	111506800	0.935	154	173			chr1	114922800	114923200	0.35	57	111			chr17	69028800	69029200	0.2425	16	19
chr1	111588000	111588400	0.53	74	92			chr1	114930800	114931200	0.33	46	65			chr17	69824400	69824800	0.2075	14	15
chr1	111682800	111683200	0.97	136	139			chr1	115000800	115001200	0.5125	51	59			chr17	71817200	71817600	0.35	19	17
chr1	111960400	111960800	0.3525	54	82			chr1	115052800	115053200	0.7025	73	76			chr17	72199600	72200000	0.265	19	18
chr1	111965600	111966000	0.7275	80	83			chr1	115053600	115054000	0.5975	62	74			chr17	72667200	72667600	0.2125	19	19
chr1	111992000	111992400	0.6425	87	94			chr1	115054000	115054400	0.86	86	93			chr17	72772400	72772800	0.2325	16	15
chr1	112050400	112050800	0.74	86	99			chr1	115124000	115124400	0.67	69	74			chr17	73008400	73008800	0.2725	19	20
chr1	112050800	112051200	0.6675	81	89			chr1	115124400	115124800	0.8175	94	93			chr17	73031200	73031600	0.2125	15	15
chr1	112078400	112078800	0.6775	85	97			chr1	115259200	115259600	0.8275	112	133			chr17	73042800	73043200	0.24	14	15
chr1	112276000	112276400	0.6675	88	111			chr1	115300000	115300400	0.6875	84	93			chr17	73127600	73128000	0.3125	18	16
chr1	112282000	112282400	0.8325	148	203			chr1	115300400	115300800	0.9175	123	140			chr17	73257600	73258000	0.265	16	17
chr1	112298000	112298400	0.8275	93	92			chr1	115323200	115323600	0.8075	108	111			chr17	73285600	73286000	0.2625	14	15
chr1	112298400	112298800	0.8625	152	188			chr1	116184000	116184400	0.745	67	69			chr17	73452400	73452800	0.345	19	15
chr1	112938400	112938800	0.6675	75	94			chr1	116694800	116695200	0.74	61	59			chr17	73663200	73663600	0.31	19	15
chr1	113008800	113009200	0.5125	91	125			chr1	116915600	116916000	0.665	63	69			chr17	74382000	74382400	0.27	19	16
chr1	113161600	113162000	0.795	95	127			chr1	116952000	116952400	0.6	58	70			chr17	74502400	74502800	0.215	15	16
chr1	113162000	113162400	0.65	79	88			chr1	116958400	116958800	0.785	87	98			chr17	74553600	74554000	0.3175	24	24
chr1	113162400	113162800	0.6675	88	106			chr1	116961200	116961600	0.55	58	56			chr17	75084800	75085200	0.135	14	17
chr1	113250000	113250400	0.4625	66	79			chr1	116962800	116963200	0.3225	44	62			chr17	76183200	76183600	0.2075	15	16
chr1	113498400	113498800	0.8625	134	171			chr1	117046800	117047200	0.835	123	121			chr17	76210000	76210400	0.2125	13	16
chr1	113498800	113499200	0.87	117	137			chr1	117047200	117047600	0.7475	70	71			chr17	76246800	76247200	0.1375	12	15
chr1	113546800	113547200	0.485	63	78			chr1	117113600	117114000	0.695	72	84			chr17	76250400	76250800	0.2475	19	19
chr1	113569600	113570000	0.455	58	80			chr1	117221600	117222000	0.61	60	67			chr17	76836800	76837200	0.285	19	17
chr1	113615600	113616000	0.8175	114	143			chr1	117222000	117222400	0.7	69	64			chr17	78075200	78075600	0.27	17	16
chr1	113616000	113616400	0.6575	80	93			chr1	117230000	117230400	0.815	102	126			chr17	78098000	78098400	0.27	17	16
chr1	113931200	113931600	0.43	58	85			chr1	117230400	117230800	0.86	103	113			chr17	78120800	78121200	0.255	18	16
chr1	113932800	113933200	0.7625	84	86			chr1	117300800	117301200	0.49	63	81			chr17	78518400	78518800	0.2775	16	15
chr1	114021200	114021600	0.5075	67	94			chr1	117368400	117368800	0.7225	55	56			chr17	78549200	78549600	0.1875	16	19
chr1	114050800	114051200	0.3875	64	105			chr1	117369600	117370000	0.615	71	78			chr17	78806800	78807200	0.1875	13	15
chr1	114302000	114302400	0.8725	120	137			chr1	117370000	117370400	0.7125	77	80			chr17	79075600	79076000	0.1425	12	15
chr1	114354800	114355200	0.895	133	173			chr1	117388800	117389200	0.6775	70	73			chr17	79504400	79504800	0.195	13	16
chr1	114447600	114448000	0.77	134	226			chr1	117420800	117421200	0.5825	55	63			chr17	79604000	79604400	0.195	19	22
chr1	114471600	114472000	0.7875	87	84			chr1	117424800	117425200	0.6575	59	64			chr17	79633600	79634000	0.2675	16	16
chr1	114472000	114472400	0.795	135	227			chr1	117602400	117602800	0.8625	88	82			chr17	79818800	79819200	0.255	16	15
chr1	114490800	114491200	0.335	49	90			chr1	117664800	117665200	0.6075	57	60			chr17	79829200	79829600	0.275	16	15
chr1	114889200	114889600	0.5	88	189			chr1	117882400	117882800	0.6225	90	110			chr17	79935200	79935600	0.1725	15	16
chr1	114996000	114996400	0.3925	55	85			chr1	117909200	117909600	0.7925	71	75			chr17	80023600	80024000	0.1625	14	18
chr1	115010000	115010400	0.5525	97	177			chr1	117909600	117910000	0.725	75	72			chr17	80452400	80452800	0.23	15	15
chr1	115053600	115054000	0.4675	97	183			chr1	117910000	117910400	0.61	65	63			chr18	268000	268400	0.255	22	21
chr1	115054000	115054400	0.6275	81	103			chr1	118148400	118148800	0.665	63	65			chr18	2571200	2571600	0.2875	17	17
chr1	115124000	115124400	0.565	76	98			chr1	118153600	118154000	0.3725	51	67			chr18	3247600	3248000	0.2625	17	16
chr1	115259200	115259600	0.73	119	168			chr1	118155200	118155600	0.655	86	144			chr18	3297200	3297600	0.275	22	23
chr1	115300000	115300400	0.815	81	88			chr1	118156000	118156400	0.5175	88	130			chr18	3603600	3604000	0.31	16	15
chr1	115300400	115300800	0.95	154	181			chr1	118187600	118188000	0.5525	66	83			chr18	6752400	6752800	0.2225	14	16
chr1	115322800	115323200	0.4575	66	88			chr1	118197600	118198000	0.48	64	78			chr18	9475200	9475600	0.24	17	15
chr1	115323200	115323600	0.8575	151	188			chr1	118202400	118202800	0.46	57	78			chr18	11688800	11689200	0.1475	12	15
chr1	116665600	116666000	0.705	111	141			chr1	118364400	118364800	0.415	64	92			chr18	13726400	13726800	0.2975	19	18
chr1	116681600	116682000	0.6	85	139			chr1	119506400	119506800	0.7375	76	74			chr18	19180800	19181200	0.1875	15	15
chr1	116695600	116696000	0.63	103	153			chr1	119682800	119683200	0.7125	87	97			chr18	19192000	19192400	0.25	20	21
chr1	116722000	116722400	0.6725	84	97			chr1	119683200	119683600	0.67	64	66			chr18	21718800	21719200	0.1825	14	15
chr1	116835600	116836000	0.66	98	173			chr1	120188400	120188800	0.5275	56	75			chr18	21977600	21978000	0.255	18	16
chr1	116854800	116855200	0.5825	65	82			chr1	120190800	120191200	0.655	63	65			chr18	22006400	22006800	0.2575	14	15
chr1	116915600	116916000	0.7925	128	156			chr1	120280000	120280400	0.395	56	86			chr18	24038000	24038400	0.26	17	16
chr1	116954800	116955200	0.525	67	96			chr1	120402400	120402800	0.465	54	64			chr18	32239600	32240000	0.1875	14	16
chr1	116960800	116961200	0.39	67	127			chr1	121336800	121337200	0.3325	64	120			chr18	32870000	32870400	0.345	22	22
chr1	116961200	116961600	0.615	92	164			chr1	145396800	145397200	0.58	55	59			chr18	33077600	33078000	0.37	28	30
chr1	116976000	116976400	0.595	65	84			chr1	145397600	145398000	0.77	83	93			chr18	33552400	33552800	0.265	19	22
chr1	117008400	117008800	0.42	58	103			chr1	145399200	145399600	0.5825	63	78			chr18	43355200	43355600	0.2475	16	15
chr1	117008800	117009200	0.6475	90	123			chr1	145438000	145438400	0.725	79	87			chr18	46065200	46065600	0.175	14	15
chr1	117017600	117018000	0.5625	58	82			chr1	145438400	145438800	0.69	71	77			chr18	46986800	46987200	0.1675	13	16
chr1	117018000	117018400	0.895	148	201			chr1	145442800	145443200	0.7625	90	95			chr18	47013600	47014000	0.245	17	17
chr1	117032000	117032400	0.6475	84	110			chr1	145455200	145455600	0.8325	87	88			chr18	47814000	47814400	0.2925	16	17
chr1	117602400	117602800	0.8025	87	90			chr1	145455600	145456000	0.8325	77	78			chr18	47901200	47901600	0.3725	20	15
chr1	117910000	117910400	0.6875	85	97			chr1	145502000	145502400	0.665	83	85			chr18	48724400	48724800	0.255	17	16
chr1	118472000	118472400	0.905	105	115			chr1	145507200	145507600	0.6275	59	62			chr18	48944400	48944800	0.2	16	17
chr1	119503200	119503600	0.8175	140	243			chr1	145507600	145508000	0.775	107	120			chr18	51750800	51751200	0.2575	16	15
chr1	119506400	119506800	0.45	91	203			chr1	145589200	145589600	0.715	80	90			chr18	51795600	51796000	0.3575	24	23
chr1	119682800	119683200	0.6575	91	104			chr1	145610800	145611200	0.8325	86	83			chr18	55288800	55289200	0.2325	16	17
chr1	119683200	119683600	0.635	81	88			chr1	146556000	146556400	0.9375	152	189			chr18	55297200	55297600	0.2125	17	18
chr1	119884000	119884400	0.6975	108	193			chr1	146556400	146556800	0.7475	65	73			chr18	56514800	56515200	0.24	15	15
chr1	120174000	120174400	0.6275	102	163			chr1	146644000	146644400	0.895	100	107			chr18	57069600	57070000	0.1775	14	15
chr1	120190800	120191200	0.8025	127	138			chr1	146714000	146714400	0.5975	57	63			chr18	60985200	60985600	0.2625	16	15
chr1	120267200	120267600	0.3575	52	94			chr1	146714400	146714800	0.79	71	66			chr18	61034800	61035200	0.255	16	15
chr1	120267600	120268000	0.4025	60	95			chr1	146849600	146850000	0.685	80	85			chr18	61089600	61090000	0.36	22	19
chr1	121260800	121261200	0.68	68	80			chr1	147144000	147144400	0.35	52	83			chr18	67873200	67873600	0.24	15	17
chr1	121261200	121261600	0.905	150	159			chr1	147735600	147736000	0.73	100	138			chr18	72163200	72163600	0.24	16	16
chr1	121264000	121264400	0.4625	80	156			chr1	147737200	147737600	0.5725	55	63			chr18	77138800	77139200	0.1925	12	15
chr1	121328000	121328400	0.44	65	96			chr1	147806400	147806800	0.73	121	162			chr18	77439200	77439600	0.2875	16	15
chr1	121328400	121328800	0.845	118	130			chr1	147806800	147807200	0.8475	100	113			chr18	77866800	77867200	0.3275	18	17
chr1	145396800	145397200	0.6925	80	99			chr1	149214800	149215200	0.6375	54	57			chr19	584400	584800	0.185	14	15
chr1	145397600	145398000	0.61	70	80			chr1	149858400	149858800	0.74	84	102			chr19	796800	797200	0.245	15	15
chr1	145399200	145399600	0.815	114	185			chr1	149859200	149859600	0.6425	66	76			chr19	861600	862000	0.2375	18	19
chr1	145438000	145438400	0.735	130	183			chr1	149860000	149860400	0.725	84	89			chr19	984000	984400	0.205	15	19
chr1	145438400	145438800	0.5725	93	145			chr1	149899600	149900000	0.695	71	71			chr19	1040000	1040400	0.2825	17	15
chr1	145470400	145470800	0.6775	99	115			chr1	149982400	149982800	0.6175	82	99			chr19	1095200	1095600	0.2775	16	16
chr1	145507200	145507600	0.6625	87	110			chr1	150039600	150040000	0.77	94	102			chr19	1269600	1270000	0.33	18	16
chr1	145507600	145508000	0.6575	82	97			chr1	150135200	150135600	0.6875	66	68			chr19	1383600	1384000	0.31	27	26
chr1	145542800	145543200	0.76	109	160			chr1	150206800	150207200	0.535	52	56			chr19	1438000	1438400	0.2	16	16
chr1	145589200	145589600	0.7725	110	118			chr1	150208400	150208800	0.75	83	84			chr19	1652800	1653200	0.255	18	17
chr1	145610800	145611200	0.9875	186	210			chr1	150241200	150241600	0.7425	70	72			chr19	1853200	1853600	0.2425	18	20
chr1	145713600	145714000	0.5525	70	84			chr1	150266000	150266400	0.775	82	95			chr19	1876000	1876400	0.2225	13	15
chr1	145720000	145720400	0.7625	139	192			chr1	150294000	150294400	0.6075	68	78			chr19	2269200	2269600	0.22	15	16
chr1	145727200	145727600	0.5875	75	103			chr1	150336000	150336400	0.8625	101	116			chr19	2273600	2274000	0.1975	15	17
chr1	146640400	146640800	0.4975	68	91			chr1	150459600	150460000	0.8375	120	151			chr19	2427600	2428000	0.185	14	15
chr1	146644000	146644400	0.9575	177	224			chr1	150478800	150479200	0.4825	65	87			chr19	2463200	2463600	0.16	16	23
chr1	146687200	146687600	0.63	77	99			chr1	150518000	150518400	0.72	97	120			chr19	2540800	2541200	0.27	16	15
chr1	146705600	146706000	0.505	72	100			chr1	150524800	150525200	0.6275	63	63			chr19	2543600	2544000	0.27	16	16
chr1	146709600	146710000	0.355	63	131			chr1	150551600	150552000	0.765	70	75			chr19	2740000	2740400	0.225	23	27
chr1	146710800	146711200	0.5075	66	82			chr1	150552000	150552400	0.5775	65	73			chr19	2783200	2783600	0.335	20	21
chr1	146714000	146714400	0.74	115	190			chr1	150577200	150577600	0.795	91	92			chr19	2819600	2820000	0.25	17	18
chr1	146714400	146714800	0.8825	118	121			chr1	150586000	150586400	0.7175	83	93			chr19	3500400	3500800	0.235	20	23
chr1	147084000	147084400	0.2975	56	91			chr1	150588000	150588400	0.6925	62	58			chr19	3721200	3721600	0.2	15	18
chr1	147142000	147142400	0.8625	92	95			chr1	150592000	150592400	0.5525	74	85			chr19	3968800	3969200	0.25	19	18
chr1	147142400	147142800	0.695	78	85			chr1	150601600	150602000	0.7625	74	72			chr19	3971200	3971600	0.25	17	18
chr1	147280000	147280400	0.2875	68	153			chr1	150602000	150602400	0.745	72	64			chr19	3985200	3985600	0.22	17	19
chr1	149858000	149858400	0.6425	65	79			chr1	150669600	150670000	0.6775	63	60			chr19	4007200	4007600	0.285	16	15
chr1	149858400	149858800	0.705	88	113			chr1	150849200	150849600	0.66	70	83			chr19	4124000	4124400	0.255	16	16
chr1	149859200	149859600	0.695	71	79			chr1	150898800	150899200	0.75	106	109			chr19	4182400	4182800	0.235	15	15
chr1	149870800	149871200	0.3025	52	78			chr1	150949600	150950000	0.7525	104	119			chr19	4246800	4247200	0.365	28	25
chr1	149899600	149900000	0.9175	137	161			chr1	150971600	150972000	0.7	77	93			chr19	4342800	4343200	0.245	15	16
chr1	149982400	149982800	0.8125	154	269			chr1	150980800	150981200	0.825	82	80			chr19	4400400	4400800	0.1675	16	19
chr1	149993200	149993600	0.6225	79	95			chr1	151027600	151028000	0.685	67	57			chr19	4402400	4402800	0.275	15	17
chr1	150039200	150039600	0.78	83	92			chr1	151030400	151030800	0.7175	76	73			chr19	4457600	4458000	0.2075	15	16
chr1	150039600	150040000	0.76	128	158			chr1	151032000	151032400	0.69	93	116			chr19	4723600	4724000	0.2775	16	16
chr1	150206800	150207200	0.5575	70	89			chr1	151042000	151042400	0.8125	94	93			chr19	4791200	4791600	0.2825	15	15
chr1	150208400	150208800	0.87	137	195			chr1	151042800	151043200	0.725	122	167			chr19	4968800	4969200	0.2425	15	15
chr1	150241200	150241600	0.885	135	161			chr1	151043200	151043600	0.7075	67	77			chr19	5340800	5341200	0.22	14	16
chr1	150266000	150266400	0.7125	128	182			chr1	151138400	151138800	0.715	87	101			chr19	5690000	5690400	0.2825	19	19
chr1	150293600	150294000	0.42	79	126			chr1	151162400	151162800	0.685	87	104			chr19	5720000	5720400	0.24	17	18
chr1	150336000	150336400	0.5625	68	82			chr1	151227200	151227600	0.6325	62	56			chr19	5790800	5791200	0.2375	16	15
chr1	150336400	150336800	0.8475	85	84			chr1	151254000	151254400	0.8875	108	110			chr19	5804000	5804400	0.2075	15	16
chr1	150383200	150383600	0.7225	112	194			chr1	151284000	151284400	0.675	98	124			chr19	5828000	5828400	0.2225	17	17
chr1	150446000	150446400	0.2875	57	113			chr1	151284400	151284800	0.7275	60	56			chr19	5903600	5904000	0.315	19	20
chr1	150459600	150460000	0.7275	128	231			chr1	151319200	151319600	0.7	70	74			chr19	5978000	5978400	0.2475	16	16
chr1	150488000	150488400	0.8275	100	116			chr1	151371600	151372000	0.4825	50	60			chr19	6280000	6280400	0.2675	16	15
chr1	150504800	150505200	0.865	105	115			chr1	151432000	151432400	0.7375	65	57			chr19	6766000	6766400	0.275	16	19
chr1	150521200	150521600	0.5675	67	81			chr1	151568800	151569200	0.5175	74	114			chr19	7587200	7587600	0.3325	21	21
chr1	150524800	150525200	0.53	74	101			chr1	151584400	151584800	0.705	70	70			chr19	7968400	7968800	0.325	20	17
chr1	150534400	150534800	0.555	82	147			chr1	151688000	151688400	0.26	39	58			chr19	7990000	7990400	0.18	16	15
chr1	150540400	150540800	0.3175	52	85			chr1	151689200	151689600	0.4025	51	57			chr19	8008400	8008800	0.245	17	16
chr1	150551600	150552000	0.835	98	94			chr1	151736000	151736400	0.555	66	68			chr19	8372800	8373200	0.285	18	15
chr1	150552000	150552400	0.6175	93	129			chr1	151762800	151763200	0.7775	83	91			chr19	8386000	8386400	0.265	24	24
chr1	150577200	150577600	0.6775	110	180			chr1	151878000	151878400	0.5075	52	64			chr19	8454800	8455200	0.225	15	18
chr1	150584000	150584400	0.785	100	106			chr1	151882000	151882400	0.815	111	109			chr19	8509600	8510000	0.2425	16	16
chr1	150601600	150602000	0.895	103	102			chr1	151960800	151961200	0.3625	59	73			chr19	9649200	9649600	0.2825	18	16
chr1	150602000	150602400	0.8525	107	110			chr1	152020400	152020800	0.81	100	108			chr19	9879200	9879600	0.2625	18	17
chr1	150669600	150670000	0.79	86	89			chr1	153316400	153316800	0.585	99	172			chr19	10138400	10138800	0.16	14	17
chr1	150849200	150849600	0.725	107	169			chr1	153405600	153406000	0.545	68	88			chr19	10216800	10217200	0.32	20	19
chr1	150898800	150899200	0.7425	113	119			chr1	153538800	153539200	0.485	71	94			chr19	10305600	10306000	0.195	15	16
chr1	150943600	150944000	0.625	112	195			chr1	153606400	153606800	0.7925	90	96			chr19	10362800	10363200	0.2775	18	16
chr1	150952000	150952400	0.395	67	105			chr1	153606800	153607200	0.575	60	71			chr19	10426400	10426800	0.2525	17	16
chr1	150954400	150954800	0.7925	138	172			chr1	153643200	153643600	0.68	60	62			chr19	10527200	10527600	0.2625	19	19
chr1	150979200	150979600	0.735	85	89			chr1	153643600	153644000	0.8	84	84			chr19	10676400	10676800	0.23	16	17
chr1	150980800	150981200	0.9125	119	133			chr1	153669600	153670000	0.5275	60	74			chr19	10679600	10680000	0.2525	15	17
chr1	150985600	150986000	0.825	118	147			chr1	153756000	153756400	0.675	82	88			chr19	10691600	10692000	0.1825	12	15
chr1	151032000	151032400	0.7025	132	198			chr1	153930800	153931200	0.69	68	75			chr19	10764400	10764800	0.395	27	25
chr1	151119200	151119600	0.8225	92	87			chr1	153939600	153940000	0.63	68	79			chr19	10812000	10812400	0.2	18	17
chr1	151138400	151138800	0.7575	142	233			chr1	153940000	153940400	0.7775	71	70			chr19	11039200	11039600	0.25	19	21
chr1	151162400	151162800	0.6375	118	234			chr1	153950000	153950400	0.7125	63	61			chr19	11266400	11266800	0.3	20	19
chr1	151170800	151171200	0.94	124	128			chr1	153962800	153963200	0.45	50	61			chr19	11491600	11492000	0.3325	20	20
chr1	151226800	151227200	0.55	60	81			chr1	153963200	153963600	0.73	94	102			chr19	11593200	11593600	0.21	16	17
chr1	151254000	151254400	0.9475	142	144			chr1	154130000	154130400	0.5875	78	101			chr19	11641200	11641600	0.185	15	17
chr1	151371600	151372000	0.4025	65	97			chr1	154155600	154156000	0.82	93	100			chr19	11646800	11647200	0.2725	17	17
chr1	151372000	151372400	0.84	98	90			chr1	154159600	154160000	0.56	67	80			chr19	12606000	12606400	0.1975	19	20
chr1	151486400	151486800	0.555	72	86			chr1	154192800	154193200	0.825	98	108			chr19	12845200	12845600	0.2175	16	16
chr1	151512800	151513200	0.805	115	129			chr1	154244800	154245200	0.9125	100	106			chr19	12848000	12848400	0.2525	17	17
chr1	151519600	151520000	0.6925	116	173			chr1	154293200	154293600	0.36	58	90			chr19	12868400	12868800	0.2825	19	18
chr1	151542400	151542800	0.4225	69	89			chr1	154326000	154326400	0.6925	90	107			chr19	12917200	12917600	0.2275	15	15
chr1	151584400	151584800	0.89	102	100			chr1	154327200	154327600	0.5075	55	62			chr19	12947200	12947600	0.13	13	17
chr1	151735600	151736000	0.43	82	138			chr1	154531200	154531600	0.77	120	131			chr19	12996000	12996400	0.24	17	17
chr1	151736000	151736400	0.525	70	90			chr1	154599600	154600000	0.59	58	61			chr19	13056400	13056800	0.3925	25	24
chr1	151762800	151763200	0.8175	150	218			chr1	154600400	154600800	0.5825	68	79			chr19	13227200	13227600	0.2325	18	19
chr1	151805200	151805600	0.48	68	91			chr1	154601600	154602000	0.525	60	71			chr19	13265600	13266000	0.205	16	17
chr1	151881600	151882000	0.45	58	83			chr1	154856400	154856800	0.395	48	58			chr19	13275200	13275600	0.215	16	20
chr1	151882000	151882400	0.8375	152	219			chr1	154908800	154909200	0.58	76	108			chr19	13885200	13885600	0.255	20	18
chr1	152020400	152020800	0.8725	112	123			chr1	154909200	154909600	0.715	70	71			chr19	13944400	13944800	0.2625	16	16
chr1	153394800	153395200	0.2025	42	93			chr1	154934000	154934400	0.795	88	96			chr19	13990800	13991200	0.2825	23	25
chr1	153517600	153518000	0.7675	95	95			chr1	154946000	154946400	0.5625	50	56			chr19	14682800	14683200	0.31	22	22
chr1	153581200	153581600	0.6575	88	109			chr1	154946800	154947200	0.64	66	79			chr19	16683200	16683600	0.2475	18	19
chr1	153581600	153582000	0.92	133	135			chr1	154947200	154947600	0.595	54	59			chr19	16770800	16771200	0.2625	16	15
chr1	153606400	153606800	0.9175	177	211			chr1	154955600	154956000	0.84	85	93			chr19	17326000	17326400	0.3	19	17
chr1	153630800	153631200	0.3775	56	98			chr1	154973200	154973600	0.7025	124	166			chr19	17371600	17372000	0.2025	14	15
chr1	153631200	153631600	0.6925	91	99			chr1	154974400	154974800	0.72	67	72			chr19	17448000	17448400	0.2525	16	15
chr1	153643600	153644000	0.865	105	128			chr1	154990000	154990400	0.765	91	104			chr19	17530400	17530800	0.285	16	16
chr1	153700000	153700400	0.81	83	84			chr1	155022800	155023200	0.7925	95	106			chr19	17607200	17607600	0.135	15	17
chr1	153748000	153748400	0.8175	80	80			chr1	155023200	155023600	0.65	58	61			chr19	17716800	17717200	0.3225	20	21
chr1	153756000	153756400	0.86	152	183			chr1	155057200	155057600	0.6175	70	79			chr19	17970400	17970800	0.3475	21	21
chr1	153895600	153896000	0.905	127	131			chr1	155107600	155108000	0.7275	66	69			chr19	18043200	18043600	0.2425	16	16
chr1	153919200	153919600	0.5025	78	154			chr1	155108000	155108400	0.87	89	88			chr19	18392400	18392800	0.2425	16	16
chr1	153926400	153926800	0.68	87	101			chr1	155112800	155113200	0.6275	73	81			chr19	18434000	18434400	0.1725	14	15
chr1	153930800	153931200	0.8675	140	173			chr1	155145600	155146000	0.6575	68	75			chr19	18682400	18682800	0.295	21	21
chr1	153935600	153936000	0.6525	83	106			chr1	155163200	155163600	0.84	86	96			chr19	19302800	19303200	0.22	15	19
chr1	153936000	153936400	0.76	84	84			chr1	155164400	155164800	0.635	60	61			chr19	19600000	19600400	0.28	17	16
chr1	153939600	153940000	0.755	147	232			chr1	155178400	155178800	0.7675	76	75			chr19	19626800	19627200	0.195	15	16
chr1	153940000	153940400	0.87	117	132			chr1	155178800	155179200	0.645	54	56			chr19	19887200	19887600	0.2775	16	15
chr1	153949600	153950000	0.775	118	150			chr1	155194400	155194800	0.69	61	63			chr19	19976400	19976800	0.3	18	18
chr1	153950000	153950400	0.86	124	142			chr1	155196400	155196800	0.62	53	56			chr19	20150000	20150400	0.285	18	18
chr1	153963200	153963600	0.8725	174	257			chr1	155214400	155214800	0.6075	105	215			chr19	30096800	30097200	0.2475	16	16
chr1	154155600	154156000	0.9075	169	248			chr1	155220400	155220800	0.4975	52	57			chr19	32836400	32836800	0.24	15	15
chr1	154192800	154193200	0.8975	175	283			chr1	155225200	155225600	0.6575	60	62			chr19	34850000	34850400	0.2525	15	15
chr1	154244800	154245200	0.895	137	175			chr1	155232000	155232400	0.8	105	116			chr19	34919200	34919600	0.195	16	16
chr1	154306800	154307200	0.6275	79	102			chr1	155243200	155243600	0.6825	71	71			chr19	35417600	35418000	0.2325	15	15
chr1	154377600	154378000	0.5775	98	165			chr1	155276800	155277200	0.25	50	99			chr19	35738800	35739200	0.275	19	17
chr1	154390800	154391200	0.9325	172	242			chr1	155278400	155278800	0.705	79	81			chr19	35739600	35740000	0.22	16	16
chr1	154392000	154392400	0.5775	94	152			chr1	155532800	155533200	0.85	109	133			chr19	36001200	36001600	0.26	18	18
chr1	154531200	154531600	0.75	174	356			chr1	155579600	155580000	0.6725	75	76			chr19	36103600	36104000	0.2725	18	20
chr1	154531600	154532000	0.6875	79	85			chr1	155658400	155658800	0.7175	75	82			chr19	36119600	36120000	0.2725	20	20
chr1	154540400	154540800	0.3525	59	248			chr1	155715200	155715600	0.615	66	76			chr19	36422400	36422800	0.3825	23	21
chr1	154580400	154580800	0.8625	89	92			chr1	155826800	155827200	0.655	68	76			chr19	36545200	36545600	0.27	17	16
chr1	154599600	154600000	0.71	74	85			chr1	155904000	155904400	0.92	104	107			chr19	36605600	36606000	0.2425	15	15
chr1	154600400	154600800	0.6	70	85			chr1	155940400	155940800	0.5725	59	58			chr19	36618800	36619200	0.35	27	26
chr1	154904400	154904800	0.6725	98	110			chr1	156024400	156024800	0.8375	92	91			chr19	36822400	36822800	0.32	21	22
chr1	154908800	154909200	0.49	120	374			chr1	156076000	156076400	0.715	69	71			chr19	37157600	37158000	0.2425	16	18
chr1	154909200	154909600	0.765	110	145			chr1	156084000	156084400	0.6675	60	56			chr19	37708800	37709200	0.2375	14	15
chr1	154917200	154917600	0.4725	83	147			chr1	156163600	156164000	0.7125	64	63			chr19	37861600	37862000	0.23	15	16
chr1	154934000	154934400	0.975	190	217			chr1	156182800	156183200	0.8725	108	102			chr19	38755200	38755600	0.2525	18	15
chr1	154945200	154945600	0.6625	89	129			chr1	156226800	156227200	0.44	48	59			chr19	38865200	38865600	0.275	16	15
chr1	154946800	154947200	0.7875	95	107			chr1	156252400	156252800	0.775	100	120			chr19	38893600	38894000	0.225	15	15
chr1	154947200	154947600	0.775	79	78			chr1	156308400	156308800	0.645	55	61			chr19	39322400	39322800	0.21	17	17
chr1	154955600	154956000	0.825	115	130			chr1	156430400	156430800	0.405	51	71			chr19	39902800	39903200	0.265	24	20
chr1	154973200	154973600	0.7075	113	154			chr1	156470800	156471200	0.845	97	105			chr19	39919200	39919600	0.2775	17	15
chr1	154973600	154974000	0.7575	117	152			chr1	156475200	156475600	0.765	93	112			chr19	39926400	39926800	0.3	18	17
chr1	154990000	154990400	0.745	140	246			chr1	156571200	156571600	0.6625	75	86			chr19	39971200	39971600	0.2625	16	17
chr1	155022800	155023200	0.475	109	192			chr1	156586400	156586800	0.4775	66	86			chr19	40476800	40477200	0.3	18	18
chr1	155023200	155023600	0.97	131	138			chr1	156630000	156630400	0.9025	116	124			chr19	40854400	40854800	0.2525	16	16
chr1	155057200	155057600	0.7475	114	176			chr1	156631200	156631600	0.7475	106	140			chr19	41168800	41169200	0.2425	18	18
chr1	155064000	155064400	0.59	90	126			chr1	156695600	156696000	0.6025	71	81			chr19	41312800	41313200	0.215	16	18
chr1	155098400	155098800	0.93	214	354			chr1	156698400	156698800	0.6975	72	77			chr19	41724800	41725200	0.3225	22	21
chr1	155099600	155100000	0.875	134	240			chr1	156710800	156711200	0.9025	115	121			chr19	41816000	41816400	0.325	20	19
chr1	155100000	155100400	0.555	86	93			chr1	156721600	156722000	0.765	72	83			chr19	41903200	41903600	0.2775	18	17
chr1	155101600	155102000	0.8375	133	195			chr1	156725200	156725600	0.4975	64	92			chr19	41945600	41946000	0.3825	22	21
chr1	155107600	155108000	0.805	106	132			chr1	156736800	156737200	0.58	57	66			chr19	42363600	42364000	0.1975	14	15
chr1	155108000	155108400	0.9875	171	194			chr1	156737200	156737600	0.8775	96	102			chr19	42724400	42724800	0.1975	15	15
chr1	155112800	155113200	0.7	92	120			chr1	156783600	156784000	0.7225	100	118			chr19	42748800	42749200	0.24	21	21
chr1	155145600	155146000	0.7375	120	207			chr1	156786400	156786800	0.6975	60	65			chr19	42772400	42772800	0.2525	17	20
chr1	155178800	155179200	0.755	87	89			chr1	156832800	156833200	0.5175	66	92			chr19	44100400	44100800	0.295	15	15
chr1	155197200	155197600	0.7775	99	111			chr1	156884400	156884800	0.6125	66	72			chr19	45004400	45004800	0.2525	15	15
chr1	155210800	155211200	0.335	53	91			chr1	156890000	156890400	0.4075	51	63			chr19	45348800	45349200	0.2625	17	16
chr1	155220400	155220800	0.465	71	102			chr1	156928000	156928400	0.57	86	132			chr19	45582400	45582800	0.1825	19	21
chr1	155225200	155225600	0.7	115	162			chr1	157108000	157108400	0.62	62	65			chr19	45681600	45682000	0.285	17	17
chr1	155231600	155232000	0.4325	67	94			chr1	157248400	157248800	0.4175	47	56			chr19	45909600	45910000	0.225	13	16
chr1	155232000	155232400	0.8675	155	185			chr1	157249200	157249600	0.47	75	122			chr19	46149200	46149600	0.2125	18	19
chr1	155243200	155243600	0.8175	117	155			chr1	157282000	157282400	0.3925	48	65			chr19	46234000	46234400	0.1975	13	16
chr1	155247200	155247600	0.8375	98	93			chr1	158656400	158656800	0.5525	70	87			chr19	46272400	46272800	0.25	17	16
chr1	155270400	155270800	0.3075	52	105			chr1	158789200	158789600	0.5575	78	108			chr19	46320400	46320800	0.23	16	20
chr1	155270800	155271200	0.6125	106	188			chr1	158979600	158980000	0.59	58	61			chr19	46386400	46386800	0.3025	17	16
chr1	155278400	155278800	0.95	152	167			chr1	158985200	158985600	0.5325	50	60			chr19	46430800	46431200	0.29	19	20
chr1	155293200	155293600	0.405	55	80			chr1	159046800	159047200	0.7625	72	69			chr19	46916800	46917200	0.2875	18	16
chr1	155294000	155294400	0.815	93	102			chr1	159147200	159147600	0.235	38	73			chr19	47104000	47104400	0.28	18	17
chr1	155532800	155533200	0.835	148	172			chr1	159750400	159750800	0.7075	59	56			chr19	47363600	47364000	0.22	15	15
chr1	155579600	155580000	0.5775	70	99			chr1	159750800	159751200	0.7625	69	63			chr19	47729200	47729600	0.24	16	16
chr1	155658400	155658800	0.685	103	127			chr1	159894400	159894800	0.64	66	72			chr19	47730800	47731200	0.2675	15	15
chr1	155715200	155715600	0.535	65	99			chr1	159894800	159895200	0.6175	65	57			chr19	47747200	47747600	0.205	14	15
chr1	155826800	155827200	0.805	113	141			chr1	160001600	160002000	0.74	71	73			chr19	48018400	48018800	0.2175	14	15
chr1	155904000	155904400	0.8875	139	188			chr1	160016400	160016800	0.7325	95	150			chr19	48352800	48353200	0.3275	20	21
chr1	155910400	155910800	0.5575	88	112			chr1	160232000	160232400	0.8475	97	104			chr19	48693600	48694000	0.285	17	16
chr1	155914400	155914800	0.4825	112	274			chr1	160254800	160255200	0.675	56	61			chr19	48949200	48949600	0.2325	17	15
chr1	155914800	155915200	0.5825	74	81			chr1	160312800	160313200	0.665	67	73			chr19	49122400	49122800	0.35	24	20
chr1	155937200	155937600	0.7775	117	173			chr1	160313200	160313600	0.7325	73	71			chr19	49256000	49256400	0.31	20	19
chr1	155960800	155961200	0.3225	48	78			chr1	160332000	160332400	0.875	89	79			chr19	49298400	49298800	0.3	20	17
chr1	155990400	155990800	0.4675	68	86			chr1	160510000	160510400	0.8325	128	185			chr19	49314000	49314400	0.3275	20	18
chr1	156024400	156024800	0.95	183	216			chr1	160518800	160519200	0.8175	83	82			chr19	49458000	49458400	0.2825	20	19
chr1	156056000	156056400	0.5475	109	203			chr1	160635600	160636000	0.64	69	72			chr19	49588400	49588800	0.3125	18	16
chr1	156066400	156066800	0.5075	70	105			chr1	160959600	160960000	0.7	84	126			chr19	49649200	49649600	0.2625	16	15
chr1	156084400	156084800	0.7775	94	97			chr1	160983600	160984000	0.8525	117	137			chr19	49982000	49982400	0.26	17	18
chr1	156088000	156088400	0.6675	84	97			chr1	160990400	160990800	0.71	87	125			chr19	49990800	49991200	0.22	17	17
chr1	156093600	156094000	0.59	78	99			chr1	161015600	161016000	0.74	67	86			chr19	50083600	50084000	0.3175	21	21
chr1	156100000	156100400	0.8375	121	189			chr1	161067200	161067600	0.305	47	75			chr19	50145200	50145600	0.2375	15	16
chr1	156154000	156154400	0.5625	79	108			chr1	161087600	161088000	0.68	70	78			chr19	50316400	50316800	0.285	15	15
chr1	156163600	156164000	0.72	84	97			chr1	161102400	161102800	0.8275	84	80			chr19	50380800	50381200	0.22	14	16
chr1	156182800	156183200	0.9775	172	190			chr1	161123600	161124000	0.695	91	111			chr19	50393200	50393600	0.25	19	24
chr1	156195200	156195600	0.3675	81	169			chr1	161136000	161136400	0.79	106	135			chr19	50490400	50490800	0.2425	16	16
chr1	156252400	156252800	0.88	157	268			chr1	161147200	161147600	0.795	86	87			chr19	50529200	50529600	0.2375	16	17
chr1	156261200	156261600	0.93	141	181			chr1	161172000	161172400	0.875	103	115			chr19	50879600	50880000	0.21	15	15
chr1	156308000	156308400	0.9175	124	120			chr1	161195600	161196000	0.69	67	75			chr19	51014400	51014800	0.3075	17	18
chr1	156326800	156327200	0.575	81	127			chr1	161284000	161284400	0.8	99	108			chr19	51040800	51041200	0.165	15	16
chr1	156338800	156339200	0.8625	124	176			chr1	161359600	161360000	0.4875	63	80			chr19	51111200	51111600	0.3375	21	19
chr1	156341600	156342000	0.7825	130	248			chr1	161369200	161369600	0.9275	126	129			chr19	51307600	51308000	0.23	14	15
chr1	156426400	156426800	0.775	81	93			chr1	161391600	161392000	0.4725	66	92			chr19	51611600	51612000	0.2575	14	15
chr1	156426800	156427200	0.835	107	123			chr1	161500800	161501200	0.69	79	94			chr19	52391200	52391600	0.315	22	20
chr1	156427200	156427600	0.515	75	108			chr1	161510000	161510400	0.71	86	104			chr19	52531600	52532000	0.33	24	21
chr1	156441200	156441600	0.6075	140	308			chr1	161582400	161582800	0.68	77	93			chr19	53811600	53812000	0.2375	16	15
chr1	156470800	156471200	0.9375	162	196			chr1	161691600	161692000	0.4775	72	87			chr19	54024000	54024400	0.3025	21	19
chr1	156475200	156475600	0.42	57	82			chr1	161696400	161696800	0.8425	91	97			chr19	54618800	54619200	0.2325	15	16
chr1	156542000	156542400	0.4325	76	102			chr1	161708400	161708800	0.69	72	86			chr19	54704400	54704800	0.2925	21	21
chr1	156561600	156562000	0.785	93	94			chr1	161719600	161720000	0.825	89	78			chr19	55672000	55672400	0.165	14	16
chr1	156571200	156571600	0.7875	122	187			chr1	161736000	161736400	0.8775	114	125			chr19	55727600	55728000	0.22	15	18
chr1	156629600	156630000	0.35	52	78			chr1	162342400	162342800	0.375	59	103			chr19	55770400	55770800	0.325	18	18
chr1	156630000	156630400	0.825	125	156			chr1	162356000	162356400	0.5225	90	123			chr19	55791200	55791600	0.2275	16	17
chr1	156631200	156631600	0.89	134	212			chr1	162467600	162468000	0.7825	81	76			chr19	55850000	55850400	0.2125	16	16
chr1	156695600	156696000	0.4725	58	78			chr1	162531600	162532000	0.755	76	76			chr19	55972800	55973200	0.2475	15	16
chr1	156698400	156698800	0.75	93	104			chr1	163291200	163291600	0.39	45	70			chr19	56015200	56015600	0.2825	18	17
chr1	156710800	156711200	0.9575	209	263			chr1	163291600	163292000	0.8975	155	183			chr19	56154800	56155200	0.17	18	18
chr1	156721600	156722000	0.8775	136	211			chr1	164681600	164682000	0.7625	110	162			chr19	57791200	57791600	0.26	19	19
chr1	156736800	156737200	0.81	94	101			chr1	165600000	165600400	0.8225	88	93			chr19	57791600	57792000	0.3325	18	16
chr1	156737200	156737600	0.905	116	133			chr1	165667200	165667600	0.695	56	57			chr19	57874400	57874800	0.25	15	15
chr1	156783600	156784000	0.7525	134	234			chr1	165738000	165738400	0.9175	118	124			chr19	57901200	57901600	0.2275	14	15
chr1	157108000	157108400	0.745	86	106			chr1	165796800	165797200	0.7475	65	67			chr19	57988800	57989200	0.275	16	15
chr1	157108400	157108800	0.7825	101	113			chr1	165797200	165797600	0.7275	64	57			chr19	58095200	58095600	0.2575	16	15
chr1	157210400	157210800	0.95	146	181			chr1	165798000	165798400	0.6725	68	74			chr19	58193200	58193600	0.3125	22	17
chr1	159147200	159147600	0.2525	50	256			chr1	165806000	165806400	0.4675	48	63			chr19	58280800	58281200	0.2875	18	16
chr1	159940800	159941200	0.725	108	137			chr1	165812000	165812400	0.54	65	74			chr19	58326000	58326400	0.2375	15	15
chr1	160001600	160002000	0.81	120	156			chr1	166458800	166459200	0.7175	63	62			chr19	58330800	58331200	0.25	16	15
chr1	160023600	160024000	0.7975	92	91			chr1	166459200	166459600	0.855	94	93			chr19	58341600	58342000	0.27	15	17
chr1	160070800	160071200	0.4875	70	111			chr1	166554400	166554800	0.685	82	104			chr19	58458800	58459200	0.26	15	15
chr1	160232000	160232400	0.925	153	216			chr1	166662400	166662800	0.4025	57	83			chr19	58609600	58610000	0.265	17	16
chr1	160254800	160255200	0.595	92	125			chr1	166674800	166675200	0.53	81	153			chr19	58666400	58666800	0.2725	18	19
chr1	160312800	160313200	0.71	126	190			chr1	166699600	166700000	0.61	54	57			chr19	58694400	58694800	0.245	17	16
chr1	160313200	160313600	0.5675	69	80			chr1	166808400	166808800	0.895	109	109			chr19	58790000	58790400	0.3325	19	16
chr1	160983600	160984000	0.95	188	266			chr1	166845200	166845600	0.6	61	58			chr19	58892000	58892400	0.265	22	22
chr1	160990800	160991200	0.7575	100	116			chr1	166845600	166846000	0.59	73	86			chr19	58898400	58898800	0.2475	17	15
chr1	161015600	161016000	0.8925	125	137			chr1	167189200	167189600	0.8	83	88			chr19	58962800	58963200	0.23	16	17
chr1	161087600	161088000	0.84	138	186			chr1	167189600	167190000	0.7375	79	84			chr19	59010800	59011200	0.135	16	17
chr1	161102400	161102800	0.755	91	96			chr1	167517600	167518000	0.7575	90	100			chr19	59025200	59025600	0.2025	14	15
chr1	161123600	161124000	0.7375	122	135			chr1	167522800	167523200	0.75	76	77			chr19	59031200	59031600	0.315	20	23
chr1	161129200	161129600	0.815	96	94			chr1	167596800	167597200	0.5025	52	58			chr2	11600	12000	0.2	16	16
chr1	161136000	161136400	0.91	135	137			chr1	167597200	167597600	0.8075	124	163			chr2	264800	265200	0.2525	17	15
chr1	161147200	161147600	0.9425	177	234			chr1	167597600	167598000	0.575	59	68			chr2	677200	677600	0.3025	18	15
chr1	161172000	161172400	0.9575	167	182			chr1	167599200	167599600	0.6725	66	62			chr2	1629200	1629600	0.2275	19	20
chr1	161188400	161188800	0.6025	84	134			chr1	167604400	167604800	0.615	61	67			chr2	2617200	2617600	0.2975	19	19
chr1	161193200	161193600	0.775	141	295			chr1	167683600	167684000	0.8975	145	192			chr2	3381600	3382000	0.2625	16	15
chr1	161194000	161194400	0.7675	116	160			chr1	167684800	167685200	0.53	75	92			chr2	3622400	3622800	0.1475	14	19
chr1	161195600	161196000	0.675	71	79			chr1	167726400	167726800	0.45	48	60			chr2	5866000	5866400	0.275	18	16
chr1	161284000	161284400	0.875	129	152			chr1	167729600	167730000	0.645	61	67			chr2	8822000	8822400	0.2575	16	16
chr1	161359600	161360000	0.5275	107	171			chr1	167772400	167772800	0.4225	53	68			chr2	9563600	9564000	0.3075	19	16
chr1	161369200	161369600	0.9425	145	190			chr1	167789200	167789600	0.68	89	111			chr2	10588800	10589200	0.21	14	15
chr1	161369600	161370000	0.6725	76	91			chr1	167838800	167839200	0.7375	70	65			chr2	10830000	10830400	0.1875	15	17
chr1	161510000	161510400	0.4375	73	134			chr1	167904800	167905200	0.6375	61	59			chr2	11606000	11606400	0.25	21	22
chr1	161672000	161672400	0.4625	86	136			chr1	167905200	167905600	0.835	72	73			chr2	11622800	11623200	0.2175	16	18
chr1	161719600	161720000	0.9925	187	207			chr1	167905600	167906000	0.8275	94	104			chr2	11810000	11810400	0.24	19	18
chr1	161734800	161735200	0.5375	69	82			chr1	167954400	167954800	0.585	81	111			chr2	15731600	15732000	0.1925	15	15
chr1	161736000	161736400	0.92	156	199			chr1	168148000	168148400	0.935	114	112			chr2	20101600	20102000	0.305	18	16
chr1	162061600	162062000	0.5225	102	149			chr1	168194800	168195200	0.7825	117	136			chr2	20298000	20298400	0.18	14	15
chr1	162101600	162102000	0.56	81	109			chr1	168195200	168195600	0.495	50	57			chr2	20335200	20335600	0.1425	15	15
chr1	162122000	162122400	0.63	103	164			chr1	168250800	168251200	0.3625	45	70			chr2	20550400	20550800	0.2125	15	17
chr1	162205200	162205600	0.5125	70	97			chr1	168256400	168256800	0.49	48	56			chr2	21022800	21023200	0.2075	16	17
chr1	162217200	162217600	0.545	85	144			chr1	168257600	168258000	0.5925	68	77			chr2	24299200	24299600	0.2575	21	22
chr1	162467600	162468000	0.915	133	143			chr1	168414800	168415200	0.445	48	59			chr2	25016000	25016400	0.29	18	15
chr1	162530400	162530800	0.75	105	164			chr1	168438800	168439200	0.4725	59	79			chr2	25194800	25195200	0.255	17	17
chr1	162702400	162702800	0.67	81	87			chr1	169162800	169163200	0.3225	40	56			chr2	25565200	25565600	0.1475	15	18
chr1	162716400	162716800	0.425	72	140			chr1	169278400	169278800	0.63	67	73			chr2	25599600	25600000	0.2525	15	16
chr1	162863200	162863600	0.355	51	98			chr1	169281600	169282000	0.43	51	63			chr2	26101200	26101600	0.2325	16	15
chr1	163291600	163292000	0.87	210	390			chr1	169337200	169337600	0.745	75	73			chr2	27304000	27304400	0.225	16	16
chr1	165107200	165107600	0.5425	69	85			chr1	169454800	169455200	0.64	50	56			chr2	27309200	27309600	0.18	15	15
chr1	165223200	165223600	0.5925	74	89			chr1	169455200	169455600	0.805	86	89			chr2	27440000	27440400	0.2075	18	18
chr1	165567200	165567600	0.4875	59	82			chr1	169764000	169764400	0.775	83	90			chr2	27579600	27580000	0.3275	21	23
chr1	165600000	165600400	0.92	144	153			chr1	169862800	169863200	0.6975	88	100			chr2	27593200	27593600	0.3175	22	22
chr1	165667600	165668000	0.6	94	136			chr1	169863200	169863600	0.8	101	106			chr2	27603600	27604000	0.295	18	18
chr1	165738000	165738400	0.985	182	217			chr1	170043600	170044000	0.7025	65	63			chr2	27886400	27886800	0.2925	20	20
chr1	165796800	165797200	0.905	103	98			chr1	170501200	170501600	0.8	95	97			chr2	29092800	29093200	0.17	14	18
chr1	165880000	165880400	0.735	123	168			chr1	171454400	171454800	0.8025	93	103			chr2	29117200	29117600	0.25	18	19
chr1	165880400	165880800	0.49	70	85			chr1	171454800	171455200	0.7	57	58			chr2	30934400	30934800	0.155	14	16
chr1	166378800	166379200	0.3375	53	80			chr1	171711200	171711600	0.9075	114	118			chr2	31456800	31457200	0.2825	17	16
chr1	166808400	166808800	0.8725	186	261			chr1	171750400	171750800	0.79	84	86			chr2	32236000	32236400	0.23	19	18
chr1	166845200	166845600	0.745	121	152			chr1	171750800	171751200	0.6275	67	82			chr2	32288400	32288800	0.3275	18	16
chr1	166845600	166846000	0.4975	77	96			chr1	172411600	172412000	0.595	67	74			chr2	32390800	32391200	0.205	17	15
chr1	167189200	167189600	0.6225	92	120			chr1	172412800	172413200	0.5125	74	89			chr2	37311200	37311600	0.27	17	16
chr1	167189600	167190000	0.74	97	103			chr1	172413200	172413600	0.4175	49	74			chr2	38152400	38152800	0.315	18	18
chr1	167266400	167266800	0.3375	62	114			chr1	172425600	172426000	0.5775	72	83			chr2	38978400	38978800	0.3325	22	21
chr1	167522800	167523200	0.6625	78	90			chr1	172501600	172502000	0.815	92	108			chr2	39351200	39351600	0.22	15	16
chr1	167683600	167684000	0.855	176	262			chr1	172502000	172502400	0.76	80	91			chr2	44588800	44589200	0.2625	15	15
chr1	167684800	167685200	0.265	51	105			chr1	172790800	172791200	0.5675	62	62			chr2	45030000	45030400	0.2325	15	16
chr1	167690800	167691200	0.68	68	82			chr1	172876400	172876800	0.6425	60	63			chr2	47403600	47404000	0.3675	21	21
chr1	167772400	167772800	0.355	60	84			chr1	172903200	172903600	0.6075	71	73			chr2	47630000	47630400	0.3	18	18
chr1	167786400	167786800	0.695	123	215			chr1	173238800	173239200	0.7325	71	66			chr2	48338400	48338800	0.295	18	17
chr1	167886400	167886800	0.575	62	81			chr1	173272400	173272800	0.7375	75	81			chr2	55496000	55496400	0.1525	15	17
chr1	167895600	167896000	0.3425	54	82			chr1	173324400	173324800	0.45	55	76			chr2	55646800	55647200	0.26	18	18
chr1	167905200	167905600	0.8875	136	153			chr1	173391600	173392000	0.5875	54	58			chr2	55844800	55845200	0.2825	20	18
chr1	167905600	167906000	0.8725	121	127			chr1	173398800	173399200	0.7725	76	74			chr2	55920800	55921200	0.225	17	19
chr1	168148000	168148400	0.93	148	174			chr1	173446000	173446400	0.61	65	69			chr2	61765200	61765600	0.27	17	18
chr1	168194800	168195200	0.72	107	159			chr1	173446400	173446800	0.71	74	79			chr2	62115600	62116000	0.285	18	17
chr1	168195200	168195600	0.675	91	104			chr1	173640000	173640400	0.3425	48	64			chr2	65357200	65357600	0.3375	23	23
chr1	168446000	168446400	0.53	70	89			chr1	173640400	173640800	0.6225	70	70			chr2	68384800	68385200	0.2425	16	16
chr1	168464800	168465200	0.5425	71	93			chr1	173684000	173684400	0.9375	156	191			chr2	68589200	68589600	0.175	17	18
chr1	168466800	168467200	0.42	67	80			chr1	173793600	173794000	0.885	92	90			chr2	68694400	68694800	0.2325	15	15
chr1	168520800	168521200	0.415	61	78			chr1	173794000	173794400	0.8875	98	100			chr2	69405200	69405600	0.28	18	18
chr1	168658400	168658800	0.485	64	93			chr1	173836800	173837200	0.8125	112	148			chr2	69664400	69664800	0.27	16	15
chr1	168709200	168709600	0.595	62	79			chr1	173837600	173838000	0.8325	77	77			chr2	70056400	70056800	0.2475	16	16
chr1	168802800	168803200	0.3825	59	86			chr1	173991600	173992000	0.7975	83	76			chr2	70141600	70142000	0.35	20	18
chr1	168803600	168804000	0.6275	80	106			chr1	174128400	174128800	0.79	97	101			chr2	70369600	70370000	0.3125	20	22
chr1	169074800	169075200	0.75	129	185			chr1	174128800	174129200	0.6425	57	64			chr2	70418000	70418400	0.3075	18	19
chr1	169075200	169075600	0.7525	88	93			chr1	174136000	174136400	0.6425	101	129			chr2	71295600	71296000	0.3275	20	19
chr1	169078800	169079200	0.49	60	79			chr1	174174000	174174400	0.8475	88	89			chr2	71357600	71358000	0.33	23	21
chr1	169085200	169085600	0.575	97	187			chr1	174846400	174846800	0.715	62	63			chr2	73089600	73090000	0.215	15	15
chr1	169117600	169118000	0.435	85	150			chr1	174933600	174934000	0.655	66	75			chr2	73190400	73190800	0.205	14	16
chr1	169454400	169454800	0.83	108	141			chr1	174968000	174968400	0.5275	50	63			chr2	74425600	74426000	0.2075	14	15
chr1	169455200	169455600	0.8075	131	210			chr1	174968400	174968800	0.9225	144	149			chr2	74426000	74426400	0.2125	16	17
chr1	169539200	169539600	0.365	57	99			chr1	174969200	174969600	0.75	64	58			chr2	74682000	74682400	0.31	27	24
chr1	169554000	169554400	0.54	71	90			chr1	174992400	174992800	0.865	107	110			chr2	74699600	74700000	0.2175	16	16
chr1	169555600	169556000	0.8875	165	216			chr1	174998800	174999200	0.6925	64	66			chr2	74734400	74734800	0.2825	16	16
chr1	169714400	169714800	0.585	70	84			chr1	176176400	176176800	0.865	94	84			chr2	85185200	85185600	0.3475	24	25
chr1	169764000	169764400	0.8325	138	178			chr1	176848800	176849200	0.44	66	102			chr2	85464800	85465200	0.1675	16	16
chr1	169862800	169863200	0.6125	79	103			chr1	178986000	178986400	0.435	54	69			chr2	85581600	85582000	0.2325	14	15
chr1	169863200	169863600	0.775	96	98			chr1	178995600	178996000	0.785	80	81			chr2	85765600	85766000	0.18	15	15
chr1	170043600	170044000	0.87	111	116			chr1	179016000	179016400	0.6525	116	194			chr2	88650400	88650800	0.225	16	17
chr1	170501200	170501600	0.8925	106	110			chr1	179016400	179016800	0.6375	72	82			chr2	88990800	88991200	0.25	17	18
chr1	171454400	171454800	0.73	123	148			chr1	179030000	179030400	0.685	68	78			chr2	95831200	95831600	0.2875	17	18
chr1	171454800	171455200	0.7725	92	94			chr1	179050800	179051200	0.6575	63	60			chr2	96874400	96874800	0.33	18	18
chr1	171711200	171711600	0.8475	144	183			chr1	179187200	179187600	0.575	52	57			chr2	96931600	96932000	0.2675	19	17
chr1	171750400	171750800	0.925	142	166			chr1	179262800	179263200	0.74	70	75			chr2	96971200	96971600	0.23	16	15
chr1	172329600	172330000	0.315	56	94			chr1	179332400	179332800	0.545	79	152			chr2	97304000	97304400	0.2225	21	23
chr1	172413200	172413600	0.685	114	167			chr1	179334800	179335200	0.7925	83	92			chr2	98612400	98612800	0.2075	14	15
chr1	172418400	172418800	0.6225	71	88			chr1	179846800	179847200	0.885	97	105			chr2	99797600	99798000	0.2175	18	19
chr1	172439200	172439600	0.4125	63	118			chr1	179851200	179851600	0.7675	69	71			chr2	99953600	99954000	0.275	17	15
chr1	172502000	172502400	0.9	133	157			chr1	179851600	179852000	0.88	136	203			chr2	101618400	101618800	0.285	22	24
chr1	173092400	173092800	0.535	71	106			chr1	179923600	179924000	0.8925	94	95			chr2	105953600	105954000	0.2725	16	15
chr1	173159600	173160000	0.52	73	106			chr1	179924000	179924400	0.6625	61	61			chr2	109335600	109336000	0.2425	17	18
chr1	173174400	173174800	0.39	70	119			chr1	179940800	179941200	0.2525	36	59			chr2	111446400	111446800	0.27	18	16
chr1	173446400	173446800	0.73	106	126			chr1	179941200	179941600	0.4575	46	62			chr2	113032800	113033200	0.2325	17	17
chr1	173446800	173447200	0.8025	93	96			chr1	180086400	180086800	0.57	60	94			chr2	113403200	113403600	0.3	20	19
chr1	173684000	173684400	0.9875	186	231			chr1	180123600	180124000	0.63	59	63			chr2	114647200	114647600	0.3275	19	18
chr1	173793200	173793600	0.52	69	80			chr1	180471600	180472000	0.7875	94	105			chr2	118572000	118572400	0.3	20	25
chr1	173793600	173794000	0.9475	119	136			chr1	180472000	180472400	0.765	110	119			chr2	120124400	120124800	0.2225	14	15
chr1	173836800	173837200	0.8175	122	168			chr1	180532000	180532400	0.475	57	62			chr2	120517200	120517600	0.385	25	23
chr1	173837200	173837600	0.735	85	88			chr1	180532400	180532800	0.6875	61	61			chr2	120550400	120550800	0.2875	19	19
chr1	173837600	173838000	0.785	87	92			chr1	180554400	180554800	0.575	60	70			chr2	121832800	121833200	0.29	23	22
chr1	173991200	173991600	0.77	98	117			chr1	180579600	180580000	0.465	50	69			chr2	122288400	122288800	0.29	19	17
chr1	173991600	173992000	0.565	69	87			chr1	180580400	180580800	0.6775	87	101			chr2	131094800	131095200	0.2575	21	19
chr1	174128400	174128800	0.8375	120	118			chr1	180601200	180601600	0.7325	69	64			chr2	131100000	131100400	0.29	15	15
chr1	174236400	174236800	0.355	61	105			chr1	180902400	180902800	0.545	63	76			chr2	149571200	149571600	0.235	15	16
chr1	174782000	174782400	0.2925	68	154			chr1	181002400	181002800	0.7	86	83			chr2	150444000	150444400	0.225	15	17
chr1	174912000	174912400	0.4875	77	125			chr1	181057600	181058000	0.915	130	150			chr2	159314400	159314800	0.2225	17	17
chr1	174968400	174968800	0.9225	153	187			chr1	181058800	181059200	0.695	69	73			chr2	160568800	160569200	0.2875	17	18
chr1	174968800	174969200	0.5125	93	157			chr1	181074000	181074400	0.8375	77	80			chr2	160778400	160778800	0.1575	12	15
chr1	174969200	174969600	0.915	118	126			chr1	181081600	181082000	0.5975	67	75			chr2	162164800	162165200	0.275	16	15
chr1	174992400	174992800	0.7275	117	179			chr1	181098800	181099200	0.325	57	94			chr2	163200400	163200800	0.275	18	17
chr1	176119600	176120000	0.405	58	78			chr1	181111600	181112000	0.555	53	57			chr2	166810400	166810800	0.3075	17	15
chr1	176176400	176176800	0.7875	93	98			chr1	181120800	181121200	0.6525	61	59			chr2	169312400	169312800	0.2175	14	16
chr1	177540800	177541200	0.3575	71	130			chr1	181122000	181122400	0.52	96	182			chr2	170440800	170441200	0.2825	21	17
chr1	177939200	177939600	0.7	82	91			chr1	181142800	181143200	0.42	68	108			chr2	170550800	170551200	0.23	14	15
chr1	178006800	178007200	0.6275	106	159			chr1	181875200	181875600	0.5375	71	81			chr2	170646400	170646800	0.2625	16	16
chr1	178022000	178022400	0.4775	73	116			chr1	182169600	182170000	0.635	77	93			chr2	170681200	170681600	0.2375	17	17
chr1	178511200	178511600	0.8425	132	186			chr1	182205200	182205600	0.48	66	93			chr2	172290400	172290800	0.41	24	21
chr1	178511600	178512000	0.6425	67	78			chr1	182226400	182226800	0.5	54	71			chr2	172864800	172865200	0.3	25	20
chr1	178590000	178590400	0.6775	97	128			chr1	182228400	182228800	0.8875	115	125			chr2	173037200	173037600	0.225	14	15
chr1	178651600	178652000	0.61	88	117			chr1	182269200	182269600	0.85	146	205			chr2	173245600	173246000	0.3	18	15
chr1	178694000	178694400	0.77	82	85			chr1	182270800	182271200	0.6675	79	81			chr2	177628800	177629200	0.26	18	19
chr1	178695200	178695600	0.7175	69	81			chr1	182307200	182307600	0.9325	147	174			chr2	178976800	178977200	0.2275	15	15
chr1	178888800	178889200	0.445	58	82			chr1	182308000	182308400	0.5925	85	107			chr2	179387600	179388000	0.275	18	20
chr1	178995200	178995600	0.62	66	83			chr1	182360400	182360800	0.705	80	92			chr2	183988800	183989200	0.19	15	16
chr1	178995600	178996000	0.7025	85	93			chr1	182360800	182361200	0.79	85	94			chr2	186603600	186604000	0.26	17	17
chr1	179050800	179051200	0.8625	124	151			chr1	182558000	182558400	0.785	77	81			chr2	189168400	189168800	0.265	16	16
chr1	179051200	179051600	0.84	111	126			chr1	182758800	182759200	0.815	86	92			chr2	190526000	190526400	0.2775	18	18
chr1	179060800	179061200	0.565	78	109			chr1	182760800	182761200	0.6375	90	134			chr2	190539200	190539600	0.27	17	17
chr1	179074000	179074400	0.7075	98	148			chr1	182764800	182765200	0.605	73	79			chr2	190627200	190627600	0.2925	21	22
chr1	179121200	179121600	0.4925	74	95			chr1	182808400	182808800	0.61	57	61			chr2	191184400	191184800	0.3625	25	23
chr1	179262800	179263200	0.9325	149	180			chr1	182808800	182809200	0.83	111	138			chr2	191878800	191879200	0.32	23	21
chr1	179334800	179335200	0.8225	107	120			chr1	183440800	183441200	0.5675	92	165			chr2	191884800	191885200	0.2125	20	21
chr1	179846800	179847200	0.6675	87	107			chr1	183441200	183441600	0.54	65	86			chr2	197664400	197664800	0.19	18	23
chr1	179851200	179851600	0.755	83	94			chr1	183604800	183605200	0.6925	82	88			chr2	198299600	198300000	0.285	17	16
chr1	179851600	179852000	0.92	167	287			chr1	184000400	184000800	0.67	86	112			chr2	198364400	198364800	0.365	24	23
chr1	179923600	179924000	0.7925	130	186			chr1	184000800	184001200	0.635	67	78			chr2	198380400	198380800	0.2875	21	21
chr1	179924000	179924400	0.835	102	109			chr1	184020800	184021200	0.89	119	120			chr2	198570000	198570400	0.31	18	17
chr1	180086000	180086400	0.6575	98	170			chr1	184723600	184724000	0.7125	65	70			chr2	200820000	200820400	0.24	15	15
chr1	180126800	180127200	0.6225	84	118			chr1	184724000	184724400	0.7225	71	64			chr2	201754000	201754400	0.2775	15	16
chr1	180471600	180472000	0.9925	203	236			chr1	184942800	184943200	0.82	89	96			chr2	201936400	201936800	0.2925	18	16
chr1	180472000	180472400	0.595	85	107			chr1	185126000	185126400	0.7525	71	77			chr2	202507200	202507600	0.18	16	16
chr1	180601200	180601600	0.87	118	124			chr1	185253600	185254000	0.6375	83	123			chr2	202860800	202861200	0.2825	17	15
chr1	180894800	180895200	0.535	79	100			chr1	185286000	185286400	0.5925	55	56			chr2	203114800	203115200	0.2525	17	16
chr1	180904800	180905200	0.6675	84	112			chr1	185286400	185286800	0.5925	68	81			chr2	204103600	204104000	0.285	16	15
chr1	180991600	180992000	0.455	65	94			chr1	185286800	185287200	0.7675	72	75			chr2	206628400	206628800	0.27	16	15
chr1	180992000	180992400	0.755	113	122			chr1	186051200	186051600	0.33	56	88			chr2	208030800	208031200	0.305	17	18
chr1	181013600	181014000	0.3475	62	108			chr1	186051600	186052000	0.3925	45	61			chr2	208890000	208890400	0.2375	21	22
chr1	181057600	181058000	0.88	143	201			chr1	186081200	186081600	0.24	40	70			chr2	217236800	217237200	0.1925	19	21
chr1	181074000	181074400	0.77	90	95			chr1	186164400	186164800	0.565	87	108			chr2	217363200	217363600	0.21	14	16
chr1	181081600	181082000	0.735	126	302			chr1	186257600	186258000	0.595	57	58			chr2	219134800	219135200	0.2675	18	16
chr1	181102800	181103200	0.5925	61	85			chr1	186344400	186344800	0.735	98	128			chr2	219260800	219261200	0.2675	16	16
chr1	181111600	181112000	0.4725	63	89			chr1	186344800	186345200	0.895	109	119			chr2	220083600	220084000	0.2325	15	16
chr1	182090000	182090400	0.7725	116	164			chr1	189118800	189119200	0.515	48	57			chr2	220110000	220110400	0.2675	17	16
chr1	182218400	182218800	0.61	94	152			chr1	191792800	191793200	0.5	55	67			chr2	220159600	220160000	0.2225	17	17
chr1	182258000	182258400	0.7725	106	156			chr1	191858400	191858800	0.445	65	85			chr2	220406400	220406800	0.2425	16	15
chr1	182260800	182261200	0.7925	112	139			chr1	192778000	192778400	0.7275	66	69			chr2	220408400	220408800	0.3475	19	19
chr1	182262400	182262800	0.535	65	110			chr1	192946400	192946800	0.5025	73	93			chr2	220430400	220430800	0.255	17	15
chr1	182270800	182271200	0.7175	121	190			chr1	192955200	192955600	0.4525	85	131			chr2	220507200	220507600	0.195	14	16
chr1	182278800	182279200	0.57	85	109			chr1	193028400	193028800	0.8075	114	150			chr2	222917600	222918000	0.235	17	15
chr1	182360400	182360800	0.745	87	115			chr1	193074400	193074800	0.7575	83	85			chr2	224482800	224483200	0.28	17	18
chr1	182360800	182361200	0.8	110	148			chr1	193080800	193081200	0.5975	58	60			chr2	224822000	224822400	0.23	23	28
chr1	182808400	182808800	0.7175	93	114			chr1	193090800	193091200	0.805	99	108			chr2	228189600	228190000	0.1525	13	15
chr1	182808800	182809200	0.8275	96	99			chr1	193091200	193091600	0.8525	106	109			chr2	232526800	232527200	0.2375	16	20
chr1	182992800	182993200	0.5475	91	132			chr1	194668000	194668400	0.575	63	63			chr2	232552000	232552400	0.2125	15	15
chr1	182999200	182999600	0.4625	75	146			chr1	195868000	195868400	0.4375	60	77			chr2	232578400	232578800	0.22	16	19
chr1	183058000	183058400	0.3425	63	88			chr1	197115600	197116000	0.835	74	71			chr2	232646000	232646400	0.2925	17	15
chr1	183439200	183439600	0.4525	76	129			chr1	197170400	197170800	0.7	77	84			chr2	232650800	232651200	0.26	23	25
chr1	183440400	183440800	0.885	93	86			chr1	197744400	197744800	0.6125	66	70			chr2	232790800	232791200	0.295	16	15
chr1	183440800	183441200	0.775	126	183			chr1	197871600	197872000	0.7375	91	110			chr2	233415200	233415600	0.2925	22	22
chr1	183604800	183605200	0.8425	108	122			chr1	197872000	197872400	0.69	54	56			chr2	234160000	234160400	0.3025	21	20
chr1	183668800	183669200	0.7675	133	201			chr1	198048400	198048800	0.3375	52	102			chr2	237994400	237994800	0.27	19	18
chr1	183749200	183749600	0.2175	48	84			chr1	198126000	198126400	0.58	52	57			chr2	238030800	238031200	0.24	15	15
chr1	184020800	184021200	0.8375	161	250			chr1	198602800	198603200	0.6775	65	70			chr2	239197600	239198000	0.2625	16	16
chr1	184723600	184724000	0.8825	93	97			chr1	200123200	200123600	0.5975	97	152			chr2	240323200	240323600	0.3425	20	19
chr1	184724000	184724400	0.7475	82	84			chr1	200195200	200195600	0.3425	50	68			chr2	240964800	240965200	0.25	16	15
chr1	185126000	185126400	0.8975	116	128			chr1	200589600	200590000	0.7025	72	79			chr2	241525600	241526000	0.255	19	17
chr1	185286000	185286400	0.59	87	108			chr1	200609200	200609600	0.6225	87	113			chr2	242041600	242042000	0.24	19	21
chr1	185615200	185615600	0.365	66	121			chr1	200638400	200638800	0.5425	60	70			chr2	242448000	242448400	0.2375	14	15
chr1	185643200	185643600	0.3175	60	114			chr1	200638800	200639200	0.745	97	100			chr2	242576800	242577200	0.2375	15	17
chr1	186344400	186344800	0.825	125	154			chr1	200639200	200639600	0.7525	69	71			chr20	247600	248000	0.2075	14	15
chr1	186344800	186345200	0.6725	83	104			chr1	200639600	200640000	0.6675	78	77			chr20	278000	278400	0.2975	19	19
chr1	192668000	192668400	0.465	66	91			chr1	200708000	200708400	0.6625	59	58			chr20	281600	282000	0.2225	16	16
chr1	192777600	192778000	0.63	108	150			chr1	200855600	200856000	0.39	55	72			chr20	304800	305200	0.255	17	18
chr1	192778000	192778400	0.63	86	98			chr1	200988400	200988800	0.5125	50	64			chr20	1098800	1099200	0.1475	13	18
chr1	193028400	193028800	0.8225	154	274			chr1	201122800	201123200	0.425	56	75			chr20	1447200	1447600	0.2575	16	17
chr1	193028800	193029200	0.86	96	88			chr1	201123600	201124000	0.7475	74	80			chr20	1946400	1946800	0.2175	15	15
chr1	193074400	193074800	0.705	111	131			chr1	201139600	201140000	0.7325	83	106			chr20	2451200	2451600	0.2375	19	19
chr1	193081200	193081600	0.46	55	80			chr1	201404800	201405200	0.39	56	78			chr20	2644800	2645200	0.2275	16	17
chr1	193090800	193091200	0.7675	146	258			chr1	201528800	201529200	0.515	66	82			chr20	3140400	3140800	0.2375	18	21
chr1	193091200	193091600	0.78	120	172			chr1	201536000	201536400	0.5575	75	108			chr20	3801200	3801600	0.27	17	15
chr1	196407600	196408000	0.43	73	109			chr1	201536400	201536800	0.6625	75	77			chr20	4066000	4066400	0.1675	14	16
chr1	196961200	196961600	0.545	81	133			chr1	201547600	201548000	0.65	101	160			chr20	5093600	5094000	0.23	19	20
chr1	197143200	197143600	0.4275	60	115			chr1	201673200	201673600	0.6375	66	84			chr20	5892000	5892400	0.255	17	17
chr1	197170400	197170800	0.6775	118	232			chr1	201798000	201798400	0.5725	66	77			chr20	9048400	9048800	0.2175	19	19
chr1	197853200	197853600	0.3925	70	129			chr1	201798400	201798800	0.805	94	98			chr20	13765200	13765600	0.135	12	15
chr1	197871600	197872000	0.8975	145	203			chr1	201865200	201865600	0.49	65	76			chr20	16710400	16710800	0.28	16	16
chr1	198126000	198126400	0.665	89	118			chr1	201892800	201893200	0.4325	52	64			chr20	17517600	17518000	0.165	14	15
chr1	198128000	198128400	0.6925	84	107			chr1	201910800	201911200	0.695	81	86			chr20	17949200	17949600	0.285	21	21
chr1	200009600	200010000	0.475	83	168			chr1	201924000	201924400	0.7625	87	102			chr20	18118400	18118800	0.2925	21	17
chr1	200232400	200232800	0.61	91	128			chr1	201924400	201924800	0.87	100	98			chr20	21283600	21284000	0.2275	16	17
chr1	200341200	200341600	0.64	102	167			chr1	201952000	201952400	0.7175	68	68			chr20	23342400	23342800	0.3625	23	22
chr1	200378800	200379200	0.7	95	112			chr1	201952400	201952800	0.645	71	74			chr20	23402000	23402400	0.215	14	15
chr1	200379200	200379600	0.6525	78	85			chr1	201977200	201977600	0.47	61	84			chr20	30102000	30102400	0.305	20	23
chr1	200589600	200590000	0.6225	83	113			chr1	201987600	201988000	0.7525	88	78			chr20	30160800	30161200	0.25	15	15
chr1	200638400	200638800	0.56	102	150			chr1	202045200	202045600	0.335	61	115			chr20	30192000	30192400	0.35	23	23
chr1	200638800	200639200	0.74	103	127			chr1	202046000	202046400	0.7525	100	151			chr20	30326800	30327200	0.2775	19	17
chr1	200708000	200708400	0.765	86	89			chr1	202087200	202087600	0.5075	62	77			chr20	30410400	30410800	0.13	10	15
chr1	200860800	200861200	0.715	87	109			chr1	202128400	202128800	0.76	90	101			chr20	30467600	30468000	0.235	17	16
chr1	200866000	200866400	0.595	78	154			chr1	202128800	202129200	0.8175	87	91			chr20	30539600	30540000	0.3975	25	25
chr1	201139600	201140000	0.5575	96	196			chr1	202129200	202129600	0.56	64	71			chr20	30582800	30583200	0.1975	14	15
chr1	201140000	201140400	0.935	138	154			chr1	202132000	202132400	0.6825	56	57			chr20	30605600	30606000	0.1525	13	15
chr1	201144400	201144800	0.48	62	96			chr1	202133600	202134000	0.7225	69	75			chr20	30619200	30619600	0.2425	16	17
chr1	201366000	201366400	0.745	107	120			chr1	202310800	202311200	0.785	89	101			chr20	30679600	30680000	0.1625	13	15
chr1	201368400	201368800	0.76	106	134			chr1	202317600	202318000	0.92	109	122			chr20	30697200	30697600	0.35	23	21
chr1	201374400	201374800	0.5475	78	103			chr1	202501200	202501600	0.6825	89	107			chr20	30795600	30796000	0.2725	16	15
chr1	201438000	201438400	0.7325	87	103			chr1	202522800	202523200	0.695	96	115			chr20	31989200	31989600	0.1975	18	19
chr1	201798000	201798400	0.5875	77	90			chr1	202774800	202775200	0.325	50	80			chr20	32700000	32700400	0.3075	21	21
chr1	201798400	201798800	0.625	76	83			chr1	202775200	202775600	0.5375	60	67			chr20	32890800	32891200	0.28	17	16
chr1	201865200	201865600	0.385	54	87			chr1	202777200	202777600	0.6525	81	90			chr20	33264800	33265200	0.26	17	17
chr1	201924400	201924800	0.975	172	217			chr1	202779600	202780000	0.7025	83	100			chr20	33680400	33680800	0.22	15	15
chr1	201952000	201952400	0.8225	95	113			chr1	202858000	202858400	0.7	69	73			chr20	33999600	34000000	0.275	17	18
chr1	201979600	201980000	0.8025	120	170			chr1	202896000	202896400	0.8725	100	108			chr20	34287200	34287600	0.315	19	18
chr1	202004000	202004400	0.66	81	97			chr1	202896400	202896800	0.5825	83	113			chr20	34330000	34330400	0.3325	20	18
chr1	202026000	202026400	0.595	73	84			chr1	202913600	202914000	0.79	90	87			chr20	34359600	34360000	0.2375	16	16
chr1	202054000	202054400	0.76	89	100			chr1	202927200	202927600	0.565	55	60			chr20	34542400	34542800	0.35	21	20
chr1	202054400	202054800	0.825	106	123			chr1	202974800	202975200	0.715	76	87			chr20	34638800	34639200	0.275	17	17
chr1	202055200	202055600	0.69	100	125			chr1	202976000	202976400	0.69	69	81			chr20	34824000	34824400	0.18	16	16
chr1	202088000	202088400	0.3875	66	88			chr1	202976400	202976800	0.765	82	85			chr20	35012400	35012800	0.175	16	17
chr1	202112000	202112400	0.4275	68	96			chr1	202995200	202995600	0.8325	118	159			chr20	35233600	35234000	0.1825	17	18
chr1	202158400	202158800	0.805	84	78			chr1	203256400	203256800	0.4775	48	59			chr20	35724400	35724800	0.275	16	15
chr1	202317600	202318000	0.9	154	192			chr1	203258800	203259200	0.5825	64	68			chr20	36661600	36662000	0.2575	17	20
chr1	202318000	202318400	0.5825	71	80			chr1	203269600	203270000	0.765	104	122			chr20	36966000	36966400	0.135	14	16
chr1	202662000	202662400	0.2025	47	145			chr1	203272400	203272800	0.47	52	63			chr20	37075200	37075600	0.2275	18	20
chr1	202777200	202777600	0.71	109	197			chr1	203274000	203274400	0.6925	56	58			chr20	37101200	37101600	0.295	17	15
chr1	202779600	202780000	0.4575	74	150			chr1	203274400	203274800	0.56	52	56			chr20	37554800	37555200	0.285	17	15
chr1	202780000	202780400	0.665	75	96			chr1	203275200	203275600	0.6225	82	106			chr20	40322000	40322400	0.245	15	17
chr1	202830000	202830400	0.8725	108	116			chr1	203280800	203281200	0.515	76	143			chr20	42286000	42286400	0.2675	25	23
chr1	202858000	202858400	0.86	135	177			chr1	203296800	203297200	0.6925	59	59			chr20	42839600	42840000	0.2275	16	17
chr1	202896000	202896400	0.835	131	203			chr1	203456800	203457200	0.7225	72	71			chr20	43594800	43595200	0.2475	16	17
chr1	202896400	202896800	0.51	91	189			chr1	203569200	203569600	0.2275	37	67			chr20	43922400	43922800	0.2575	17	16
chr1	202976400	202976800	0.83	111	118			chr1	203595600	203596000	0.6825	66	68			chr20	44518800	44519200	0.2475	18	15
chr1	203274400	203274800	0.62	95	139			chr1	203619600	203620000	0.7025	75	92			chr20	44519600	44520000	0.26	21	23
chr1	203652000	203652400	0.605	83	116			chr1	203643200	203643600	0.7825	97	110			chr20	44600800	44601200	0.3	20	19
chr1	203764400	203764800	0.5325	96	181			chr1	203661600	203662000	0.57	54	61			chr20	46012800	46013200	0.23	16	16
chr1	203830400	203830800	0.7625	147	273			chr1	203695600	203696000	0.7725	92	113			chr20	46130400	46130800	0.2825	17	18
chr1	203830800	203831200	0.7575	121	161			chr1	203764400	203764800	0.67	90	120			chr20	47538000	47538400	0.21	15	15
chr1	204042000	204042400	0.3525	79	134			chr1	203765200	203765600	0.625	58	57			chr20	48227600	48228000	0.255	16	17
chr1	204042400	204042800	0.72	85	89			chr1	203830400	203830800	0.7675	115	137			chr20	48429200	48429600	0.285	15	15
chr1	204043600	204044000	0.8	134	170			chr1	203830800	203831200	0.775	103	111			chr20	48595600	48596000	0.2375	17	15
chr1	204062400	204062800	0.5025	62	93			chr1	204140800	204141200	0.1975	33	64			chr20	49262000	49262400	0.195	15	15
chr1	204071200	204071600	0.655	79	113			chr1	204146400	204146800	0.4775	52	64			chr20	49407200	49407600	0.2425	19	19
chr1	204114000	204114400	0.49	92	154			chr1	204332800	204333200	0.6	59	64			chr20	49546000	49546400	0.29	24	20
chr1	204182800	204183200	0.625	73	83			chr1	204380800	204381200	0.7825	95	109			chr20	49548000	49548400	0.34	24	24
chr1	204183200	204183600	0.9375	178	220			chr1	204386400	204386800	0.6975	72	80			chr20	50416800	50417200	0.2425	15	15
chr1	204223200	204223600	0.8	133	220			chr1	204386800	204387200	0.5375	64	72			chr20	52029600	52030000	0.2775	19	18
chr1	204235600	204236000	0.77	104	124			chr1	204463600	204464000	0.71	66	66			chr20	55807200	55807600	0.2525	18	18
chr1	204347200	204347600	0.92	110	110			chr1	204475600	204476000	0.7475	73	87			chr20	57226000	57226400	0.2675	23	24
chr1	204367600	204368000	0.425	64	84			chr1	204476000	204476400	0.695	81	98			chr20	60011600	60012000	0.2725	18	18
chr1	204380800	204381200	0.895	148	184			chr1	204485200	204485600	0.7575	77	85			chr20	60936800	60937200	0.2225	16	18
chr1	204463600	204464000	0.8125	115	126			chr1	204485600	204486000	0.8675	130	153			chr20	61422800	61423200	0.2075	14	16
chr1	204476000	204476400	0.6175	77	133			chr1	204488000	204488400	0.4925	49	58			chr20	61569200	61569600	0.21	17	18
chr1	204485200	204485600	0.6125	81	124			chr1	204534800	204535200	0.73	91	107			chr20	62289600	62290000	0.2025	14	15
chr1	204485600	204486000	0.72	136	227			chr1	204616800	204617200	0.385	69	110			chr20	62496400	62496800	0.2925	21	20
chr1	205091200	205091600	0.7025	110	256			chr1	204641600	204642000	0.71	112	149			chr20	62587600	62588000	0.27	16	16
chr1	205180400	205180800	0.915	130	150			chr1	204660400	204660800	0.485	51	57			chr21	26979600	26980000	0.2625	20	21
chr1	205180800	205181200	0.4125	76	198			chr1	204662000	204662400	0.6675	72	73			chr21	27107200	27107600	0.3125	19	17
chr1	205254000	205254400	0.6175	94	146			chr1	204675600	204676000	0.51	71	101			chr21	27542800	27543200	0.2025	14	15
chr1	205270400	205270800	0.4625	73	122			chr1	204680400	204680800	0.55	74	144			chr21	30365200	30365600	0.2925	18	18
chr1	205290400	205290800	0.765	89	106			chr1	204732800	204733200	0.405	46	58			chr21	30374800	30375200	0.1725	16	19
chr1	205454400	205454800	0.415	92	161			chr1	204776400	204776800	0.44	53	62			chr21	34914800	34915200	0.2125	16	16
chr1	205461200	205461600	0.38	68	108			chr1	205091200	205091600	0.8675	135	200			chr21	38639600	38640000	0.29	17	16
chr1	205561200	205561600	0.62	82	96			chr1	205126400	205126800	0.7875	109	126			chr21	40402400	40402800	0.255	17	17
chr1	205600800	205601200	0.4125	64	114			chr1	205180400	205180800	0.6975	61	58			chr21	44299600	44300000	0.33	23	23
chr1	205601200	205601600	0.6675	99	159			chr1	205180800	205181200	0.5225	89	156			chr21	45079200	45079600	0.28	19	18
chr1	205645200	205645600	0.5025	67	88			chr1	205198000	205198400	0.4575	47	61			chr21	45209200	45209600	0.2525	19	20
chr1	205718400	205718800	0.76	108	164			chr1	205207200	205207600	0.4175	48	58			chr21	45759200	45759600	0.235	17	18
chr1	206285200	206285600	0.865	143	190			chr1	205225200	205225600	0.7075	95	117			chr21	46359600	46360000	0.2275	18	21
chr1	206288000	206288400	0.8575	118	143			chr1	205600400	205600800	0.695	58	61			chr21	46826800	46827200	0.2325	15	15
chr1	206292400	206292800	0.4875	76	111			chr1	205600800	205601200	0.565	56	65			chr21	47878400	47878800	0.2975	17	17
chr1	206310400	206310800	0.3775	69	98			chr1	205601200	205601600	0.6375	73	85			chr22	19132000	19132400	0.285	21	21
chr1	206785600	206786000	0.71	147	380			chr1	205647600	205648000	0.73	109	161			chr22	19435200	19435600	0.3025	17	15
chr1	206808400	206808800	0.3925	77	138			chr1	205718400	205718800	0.755	78	92			chr22	19692800	19693200	0.2375	15	17
chr1	206808800	206809200	0.755	113	126			chr1	205719600	205720000	0.82	93	101			chr22	20104800	20105200	0.265	18	18
chr1	207224000	207224400	0.75	98	111			chr1	205744400	205744800	0.6625	64	80			chr22	20960400	20960800	0.2325	16	17
chr1	207226400	207226800	0.875	131	154			chr1	206266000	206266400	0.5225	64	81			chr22	21271200	21271600	0.2275	14	16
chr1	207262400	207262800	0.7175	102	175			chr1	206274000	206274400	0.3325	44	58			chr22	21457200	21457600	0.18	15	17
chr1	207277200	207277600	0.4775	59	89			chr1	206612400	206612800	0.3725	55	71			chr22	21983600	21984000	0.2775	20	18
chr1	207326000	207326400	0.2875	52	85			chr1	206674400	206674800	0.5375	59	72			chr22	22337200	22337600	0.0975	11	15
chr1	207378400	207378800	0.59	79	101			chr1	206730400	206730800	0.8125	79	94			chr22	24059200	24059600	0.2075	16	16
chr1	207414800	207415200	0.715	90	112			chr1	206736400	206736800	0.59	54	70			chr22	26879600	26880000	0.2925	18	20
chr1	207494800	207495200	0.85	103	121			chr1	206748800	206749200	0.72	72	80			chr22	27041200	27041600	0.2325	14	16
chr1	207777200	207777600	0.38	67	133			chr1	206785600	206786000	0.8625	138	199			chr22	27044000	27044400	0.28	17	17
chr1	207925200	207925600	0.97	125	127			chr1	206808800	206809200	0.825	101	103			chr22	27054800	27055200	0.27	19	18
chr1	207926000	207926400	0.6925	103	125			chr1	206825200	206825600	0.3675	52	84			chr22	29137600	29138000	0.2075	17	19
chr1	207997200	207997600	0.445	65	84			chr1	206833200	206833600	0.49	56	69			chr22	29709200	29709600	0.2925	23	24
chr1	208136800	208137200	0.8125	96	99			chr1	206845200	206845600	0.2775	52	71			chr22	30820000	30820400	0.2725	18	20
chr1	208137200	208137600	0.465	68	90			chr1	206846400	206846800	0.6025	93	160			chr22	31500800	31501200	0.19	15	15
chr1	208293200	208293600	0.57	81	129			chr1	206846800	206847200	0.6075	58	58			chr22	31556000	31556400	0.18	11	15
chr1	208345600	208346000	0.4875	76	87			chr1	206890800	206891200	0.6825	75	81			chr22	31686800	31687200	0.2275	18	15
chr1	208409600	208410000	0.57	71	83			chr1	206908800	206909200	0.47	74	129			chr22	31739200	31739600	0.195	17	17
chr1	209921200	209921600	0.6375	96	128			chr1	207020800	207021200	0.5075	74	106			chr22	32058000	32058400	0.2475	16	15
chr1	210001200	210001600	0.8	128	170			chr1	207190800	207191200	0.3325	49	82			chr22	32146000	32146400	0.2275	13	15
chr1	210502400	210502800	0.74	74	79			chr1	207194400	207194800	0.7575	105	142			chr22	35653200	35653600	0.19	14	15
chr1	210547200	210547600	0.67	103	140			chr1	207197600	207198000	0.95	165	233			chr22	35772800	35773200	0.2825	21	23
chr1	211432000	211432400	0.7675	130	242			chr1	207198000	207198400	0.7425	64	72			chr22	36520000	36520400	0.27	18	19
chr1	211432400	211432800	0.59	72	94			chr1	207198400	207198800	0.5275	55	74			chr22	36635600	36636000	0.2475	17	17
chr1	211556000	211556400	0.795	134	200			chr1	207224000	207224400	0.6425	54	59			chr22	36725600	36726000	0.2425	16	16
chr1	211688800	211689200	0.84	121	145			chr1	207226400	207226800	0.7775	84	99			chr22	36806000	36806400	0.2	12	15
chr1	211692800	211693200	0.52	69	96			chr1	207258000	207258400	0.535	66	83			chr22	36925200	36925600	0.27	16	16
chr1	211751200	211751600	0.9525	128	132			chr1	207378400	207378800	0.81	96	108			chr22	37178000	37178400	0.24	16	18
chr1	211752800	211753200	0.825	112	118			chr1	207483200	207483600	0.75	86	100			chr22	37252400	37252800	0.2525	16	18
chr1	211776800	211777200	0.595	92	165			chr1	207484400	207484800	0.445	55	68			chr22	37957600	37958000	0.2225	18	20
chr1	211782400	211782800	0.385	66	109			chr1	207485200	207485600	0.44	53	66			chr22	38003200	38003600	0.2	17	17
chr1	211810000	211810400	0.48	80	100			chr1	207490000	207490400	0.745	72	82			chr22	38004400	38004800	0.285	18	15
chr1	211816400	211816800	0.2525	54	129			chr1	207494400	207494800	0.725	77	88			chr22	38082000	38082400	0.2	15	15
chr1	211816800	211817200	0.8125	107	139			chr1	207494800	207495200	0.8075	98	112			chr22	38330000	38330400	0.1875	14	15
chr1	211840400	211840800	0.46	76	129			chr1	207536400	207536800	0.445	49	57			chr22	38448400	38448800	0.18	14	15
chr1	211849200	211849600	0.85	144	234			chr1	207693600	207694000	0.4575	76	117			chr22	38636800	38637200	0.22	15	17
chr1	211872000	211872400	0.4375	69	119			chr1	207799600	207800000	0.615	88	111			chr22	39077600	39078000	0.22	15	16
chr1	211957200	211957600	0.395	67	114			chr1	207800000	207800400	0.59	61	64			chr22	39570800	39571200	0.3225	23	23
chr1	212059600	212060000	0.625	84	121			chr1	207808800	207809200	0.4375	50	67			chr22	39715600	39716000	0.3325	24	21
chr1	212068800	212069200	0.445	63	87			chr1	207809200	207809600	0.685	67	68			chr22	39795600	39796000	0.2725	19	18
chr1	212102400	212102800	0.62	88	130			chr1	207818400	207818800	0.805	81	78			chr22	39898000	39898400	0.2375	17	18
chr1	212118000	212118400	0.4725	86	152			chr1	207823200	207823600	0.6675	73	98			chr22	39916400	39916800	0.315	19	18
chr1	212208400	212208800	0.9	127	142			chr1	207854000	207854400	0.4725	61	76			chr22	39925200	39925600	0.2175	21	22
chr1	212208800	212209200	0.84	118	126			chr1	207919600	207920000	0.55	60	74			chr22	39928800	39929200	0.2825	16	16
chr1	212402000	212402400	0.59	80	115			chr1	207921200	207921600	0.665	53	56			chr22	40440400	40440800	0.2375	16	15
chr1	212416000	212416400	0.6925	85	95			chr1	207925200	207925600	0.805	87	81			chr22	40573600	40574000	0.215	16	18
chr1	212428400	212428800	0.6125	85	152			chr1	207979200	207979600	0.635	67	72			chr22	41418400	41418800	0.1975	19	19
chr1	212429200	212429600	0.7575	91	107			chr1	207991600	207992000	0.49	55	67			chr22	41682000	41682400	0.2725	18	17
chr1	212431600	212432000	0.54	67	88			chr1	207999200	207999600	0.85	102	109			chr22	41697200	41697600	0.2	15	15
chr1	212458000	212458400	0.85	110	144			chr1	208096800	208097200	0.405	55	66			chr22	41842800	41843200	0.2875	22	21
chr1	212458400	212458800	0.8525	104	116			chr1	208108400	208108800	0.5625	90	121			chr22	41844400	41844800	0.2425	15	15
chr1	212588000	212588400	0.7925	114	132			chr1	208136800	208137200	0.84	97	93			chr22	41864800	41865200	0.33	21	20
chr1	212782000	212782400	0.63	103	173			chr1	208195200	208195600	0.355	71	109			chr22	41908800	41909200	0.26	16	16
chr1	212894800	212895200	0.6675	92	108			chr1	208357600	208358000	0.5375	78	90			chr22	42353600	42354000	0.245	17	20
chr1	212964800	212965200	0.515	70	142			chr1	208393200	208393600	0.78	101	112			chr22	42486800	42487200	0.2275	15	15
chr1	212965200	212965600	0.8675	163	293			chr1	208409200	208409600	0.5275	53	62			chr22	43011200	43011600	0.3325	21	19
chr1	213001200	213001600	0.6725	81	96			chr1	209819200	209819600	0.5275	55	70			chr22	45371600	45372000	0.1675	14	15
chr1	213031200	213031600	0.7725	88	107			chr1	209848400	209848800	0.625	56	61			chr22	47158400	47158800	0.2675	17	16
chr1	213031600	213032000	0.745	89	100			chr1	209921200	209921600	0.545	57	69			chr22	50683200	50683600	0.2225	17	16
chr1	213188400	213188800	0.6875	93	130			chr1	209957600	209958000	0.5175	54	70			chr22	50946400	50946800	0.2	14	15
chr1	213188800	213189200	0.77	89	105			chr1	209958000	209958400	0.905	111	113			chr22	50964000	50964400	0.2225	16	16
chr1	213224400	213224800	0.8475	129	144			chr1	210000800	210001200	0.745	92	94			chr3	4508800	4509200	0.1975	20	20
chr1	213545600	213546000	0.625	117	306			chr1	210001200	210001600	0.7625	72	75			chr3	4534800	4535200	0.275	18	18
chr1	213567200	213567600	0.4125	71	93			chr1	211395600	211396000	0.2775	44	57			chr3	4910000	4910400	0.2225	17	17
chr1	213665600	213666000	0.7675	100	132			chr1	211432000	211432400	0.7775	92	116			chr3	5163600	5164000	0.2075	16	16
chr1	213746400	213746800	0.56	79	122			chr1	211432400	211432800	0.7175	76	78			chr3	8543200	8543600	0.31	19	18
chr1	213910800	213911200	0.5575	89	166			chr1	211556000	211556400	0.8175	120	152			chr3	9004800	9005200	0.235	17	17
chr1	213933200	213933600	0.555	98	213			chr1	211688800	211689200	0.8425	82	89			chr3	9144000	9144400	0.2425	15	15
chr1	213966800	213967200	0.655	82	96			chr1	211722000	211722400	0.725	77	80			chr3	9690800	9691200	0.2525	16	16
chr1	214129600	214130000	0.5975	83	101			chr1	211729600	211730000	0.7175	66	74			chr3	10068000	10068400	0.2375	17	16
chr1	214156000	214156400	0.645	71	79			chr1	211751200	211751600	0.7175	68	64			chr3	10362800	10363200	0.1625	18	21
chr1	214161200	214161600	0.73	90	100			chr1	211780400	211780800	0.755	75	66			chr3	11314000	11314400	0.2575	18	16
chr1	214162800	214163200	0.7175	92	106			chr1	211786400	211786800	0.71	83	84			chr3	12598400	12598800	0.3125	24	24
chr1	214200800	214201200	0.385	66	102			chr1	211786800	211787200	0.81	96	101			chr3	12705600	12706000	0.27	19	19
chr1	214202400	214202800	0.5875	82	118			chr1	211803600	211804000	0.805	117	146			chr3	13503200	13503600	0.175	17	17
chr1	214218000	214218400	0.7125	85	92			chr1	211848800	211849200	0.66	55	57			chr3	13692000	13692400	0.255	20	21
chr1	214224000	214224400	0.81	144	236			chr1	211849200	211849600	0.8225	93	109			chr3	14220000	14220400	0.2325	15	15
chr1	214296400	214296800	0.4225	55	80			chr1	211896000	211896400	0.735	82	92			chr3	14257600	14258000	0.1725	15	16
chr1	214300000	214300400	0.6375	92	137			chr1	212101600	212102000	0.555	68	83			chr3	14693200	14693600	0.1925	17	16
chr1	214454000	214454400	0.845	116	142			chr1	212208400	212208800	0.7325	115	139			chr3	15140400	15140800	0.255	18	20
chr1	214458000	214458400	0.5775	71	100			chr1	212208800	212209200	0.655	67	66			chr3	19988400	19988800	0.265	18	17
chr1	214612800	214613200	0.5925	93	129			chr1	212325600	212326000	0.735	100	154			chr3	20227600	20228000	0.275	16	15
chr1	214776400	214776800	0.8325	115	123			chr1	212408000	212408400	0.7925	83	85			chr3	23958400	23958800	0.3225	18	18
chr1	214851600	214852000	0.3825	82	149			chr1	212415600	212416000	0.8475	105	118			chr3	25706400	25706800	0.2375	17	15
chr1	215740400	215740800	0.7925	123	178			chr1	212458000	212458400	0.8125	95	111			chr3	28390400	28390800	0.295	19	16
chr1	217804000	217804400	0.4725	78	109			chr1	212458400	212458800	0.685	57	57			chr3	31573600	31574000	0.2625	18	18
chr1	218458400	218458800	0.895	145	259			chr1	212458800	212459200	0.6125	61	66			chr3	32822800	32823200	0.255	18	19
chr1	219347200	219347600	0.9	149	202			chr1	212588400	212588800	0.5725	55	61			chr3	32911200	32911600	0.33	20	20
chr1	219483600	219484000	0.6525	103	145			chr1	212604400	212604800	0.66	95	115			chr3	33840000	33840400	0.3525	23	18
chr1	219504000	219504400	0.3525	52	82			chr1	212651600	212652000	0.4425	67	115			chr3	37034800	37035200	0.255	17	18
chr1	220057200	220057600	0.7175	111	142			chr1	212662000	212662400	0.6775	61	58			chr3	38692800	38693200	0.1975	16	16
chr1	220100000	220100400	0.5475	74	98			chr1	212732000	212732400	0.8125	87	93			chr3	39093200	39093600	0.21	15	15
chr1	220102000	220102400	0.8525	115	112			chr1	212732400	212732800	0.8225	93	102			chr3	39196000	39196400	0.27	17	15
chr1	220219600	220220000	0.8825	153	229			chr1	212782000	212782400	0.835	104	123			chr3	39446400	39446800	0.29	18	18
chr1	220263200	220263600	0.6825	91	124			chr1	212808800	212809200	0.3625	53	71			chr3	39448000	39448400	0.225	17	17
chr1	220267200	220267600	0.43	55	81			chr1	212810000	212810400	0.2775	49	70			chr3	40350800	40351200	0.3725	23	23
chr1	220267600	220268000	0.9125	130	130			chr1	212964800	212965200	0.4775	74	103			chr3	41240800	41241200	0.24	19	19
chr1	220445600	220446000	0.925	153	196			chr1	212965200	212965600	0.82	118	141			chr3	44754000	44754400	0.26	18	18
chr1	220863600	220864000	0.8325	143	192			chr1	212966800	212967200	0.5275	73	107			chr3	44770800	44771200	0.1925	15	16
chr1	220908000	220908400	0.5	65	81			chr1	213031200	213031600	0.69	61	69			chr3	44803200	44803600	0.2575	19	19
chr1	220921600	220922000	0.88	120	125			chr1	213031600	213032000	0.5325	60	64			chr3	45430000	45430400	0.2125	16	17
chr1	220960000	220960400	0.8275	131	155			chr1	213034000	213034400	0.7175	97	127			chr3	45883600	45884000	0.245	18	17
chr1	221916000	221916400	0.6825	75	78			chr1	213188800	213189200	0.5975	61	68			chr3	47422400	47422800	0.295	17	16
chr1	222638800	222639200	0.885	161	289			chr1	213218800	213219200	0.775	92	92			chr3	47517200	47517600	0.2325	20	20
chr1	222763200	222763600	0.765	104	119			chr1	213224400	213224800	0.7675	94	109			chr3	47563600	47564000	0.215	18	17
chr1	222817200	222817600	0.665	94	123			chr1	213224800	213225200	0.7775	82	92			chr3	47866400	47866800	0.2475	17	16
chr1	222817600	222818000	0.7725	130	160			chr1	213228400	213228800	0.6625	64	66			chr3	48342800	48343200	0.1975	15	16
chr1	222886400	222886800	0.7125	91	120			chr1	213298000	213298400	0.3925	50	63			chr3	48488000	48488400	0.2675	16	16
chr1	222988400	222988800	0.7525	103	121			chr1	213779200	213779600	0.3125	43	59			chr3	48514400	48514800	0.27	18	16
chr1	223254800	223255200	0.45	72	101			chr1	214776000	214776400	0.5525	64	77			chr3	48516000	48516400	0.18	14	15
chr1	223810000	223810400	0.6225	70	83			chr1	214776400	214776800	0.74	69	69			chr3	48699200	48699600	0.2775	18	16
chr1	224033600	224034000	0.44	84	107			chr1	215740400	215740800	0.87	89	96			chr3	48700800	48701200	0.2525	17	17
chr1	224074400	224074800	0.4	70	97			chr1	218458400	218458800	0.6925	112	156			chr3	49058800	49059200	0.2575	15	15
chr1	224301600	224302000	0.68	116	184			chr1	218478000	218478400	0.7875	99	106			chr3	49059200	49059600	0.2825	19	19
chr1	224518000	224518400	0.6	96	113			chr1	219262000	219262400	0.48	59	72			chr3	49066800	49067200	0.2425	16	19
chr1	224544400	224544800	0.855	113	122			chr1	219262400	219262800	0.5725	74	92			chr3	49395600	49396000	0.2625	18	16
chr1	224622400	224622800	0.75	140	187			chr1	219294400	219294800	0.755	76	80			chr3	49711200	49711600	0.2425	15	15
chr1	225117200	225117600	0.785	163	294			chr1	219347200	219347600	0.8525	113	123			chr3	49726800	49727200	0.175	12	15
chr1	225133600	225134000	0.425	74	141			chr1	220080000	220080400	0.465	51	66			chr3	49824000	49824400	0.2	15	16
chr1	225169600	225170000	0.5675	81	105			chr1	220080400	220080800	0.8075	92	100			chr3	50283600	50284000	0.195	18	21
chr1	225396800	225397200	0.4825	61	81			chr1	220080800	220081200	0.82	91	108			chr3	50329600	50330000	0.175	13	16
chr1	225416400	225416800	0.3575	59	96			chr1	220219600	220220000	0.9075	107	117			chr3	50396800	50397200	0.255	15	16
chr1	225616000	225616400	0.7375	86	89			chr1	220263200	220263600	0.7075	84	85			chr3	51422400	51422800	0.2975	18	16
chr1	225662800	225663200	0.7575	115	152			chr1	220292400	220292800	0.4725	67	85			chr3	51428400	51428800	0.3225	20	21
chr1	225859200	225859600	0.5375	69	98			chr1	220445600	220446000	0.8725	106	108			chr3	51572400	51572800	0.18	17	18
chr1	225882000	225882400	0.49	75	119			chr1	220474000	220474400	0.65	62	57			chr3	51703200	51703600	0.215	16	16
chr1	225888000	225888400	0.605	87	105			chr1	221100800	221101200	0.2325	42	56			chr3	51740800	51741200	0.2125	16	15
chr1	225956400	225956800	0.5625	61	89			chr1	221140000	221140400	0.2625	45	72			chr3	52017200	52017600	0.2075	14	15
chr1	225965200	225965600	0.8625	147	195			chr1	221840800	221841200	0.3525	45	59			chr3	52029600	52030000	0.28	19	19
chr1	226001200	226001600	0.8675	174	291			chr1	221881200	221881600	0.3725	76	118			chr3	52035600	52036000	0.21	15	15
chr1	226012800	226013200	0.4775	75	128			chr1	221885600	221886000	0.6325	61	62			chr3	52188800	52189200	0.2325	15	15
chr1	226070000	226070400	0.9	113	131			chr1	221887600	221888000	0.61	61	60			chr3	52570400	52570800	0.2325	18	17
chr1	226111600	226112000	0.7725	148	220			chr1	221896400	221896800	0.64	61	65			chr3	52720000	52720400	0.215	17	16
chr1	226186800	226187200	0.71	120	162			chr1	221915600	221916000	0.7275	73	86			chr3	53080400	53080800	0.2775	16	15
chr1	226249600	226250000	0.67	85	105			chr1	222131600	222132000	0.5675	50	56			chr3	53164400	53164800	0.2775	18	19
chr1	226250400	226250800	0.8275	104	117			chr1	222135600	222136000	0.31	51	99			chr3	53381600	53382000	0.2325	20	22
chr1	226271200	226271600	0.925	146	166			chr1	222161200	222161600	0.355	48	61			chr3	56836000	56836400	0.3	17	15
chr1	226315600	226316000	0.7325	86	95			chr1	222638800	222639200	0.9275	128	157			chr3	57164800	57165200	0.3175	22	20
chr1	226374400	226374800	0.9	165	190			chr1	222763200	222763600	0.7775	94	104			chr3	57541600	57542000	0.3175	20	19
chr1	226410800	226411200	0.66	85	101			chr1	222817200	222817600	0.7675	80	96			chr3	57583200	57583600	0.325	20	18
chr1	226595600	226596000	0.6725	103	142			chr1	222817600	222818000	0.6675	72	70			chr3	57741600	57742000	0.2425	16	16
chr1	226730400	226730800	0.61	71	81			chr1	222883200	222883600	0.425	54	68			chr3	58291600	58292000	0.1975	15	15
chr1	227127200	227127600	0.765	81	109			chr1	222885200	222885600	0.5975	68	78			chr3	61674000	61674400	0.2725	18	15
chr1	227127600	227128000	0.8775	152	200			chr1	222886000	222886400	0.785	105	124			chr3	63001200	63001600	0.2375	16	17
chr1	227128000	227128400	0.6925	75	81			chr1	222886400	222886800	0.72	81	81			chr3	64016400	64016800	0.2425	15	15
chr1	227132400	227132800	0.69	98	115			chr1	223079600	223080000	0.465	57	90			chr3	66271200	66271600	0.225	16	18
chr1	227133200	227133600	0.7075	94	147			chr1	223316000	223316400	0.5125	62	82			chr3	69062800	69063200	0.305	20	15
chr1	227730400	227730800	0.395	62	81			chr1	223406800	223407200	0.815	120	136			chr3	101249200	101249600	0.185	13	15
chr1	227751200	227751600	0.825	133	150			chr1	223866400	223866800	0.3475	63	95			chr3	101280400	101280800	0.2125	15	17
chr1	227922800	227923200	0.8725	177	332			chr1	223894800	223895200	0.4675	52	65			chr3	101292800	101293200	0.2975	21	18
chr1	228270000	228270400	0.7475	100	116			chr1	223900000	223900400	0.69	63	66			chr3	101396000	101396400	0.25	17	16
chr1	228290800	228291200	0.8575	146	265			chr1	223920400	223920800	0.435	73	114			chr3	112770000	112770400	0.2	15	15
chr1	228296800	228297200	0.835	152	259			chr1	223959600	223960000	0.73	103	131			chr3	113775600	113776000	0.2325	16	15
chr1	228327600	228328000	0.9525	148	170			chr1	223963600	223964000	0.4875	52	63			chr3	115342000	115342400	0.165	15	17
chr1	228353200	228353600	0.65	97	119			chr1	223964000	223964400	0.7425	63	62			chr3	119182400	119182800	0.2825	20	19
chr1	228353600	228354000	0.715	76	81			chr1	223976400	223976800	0.425	44	56			chr3	119187600	119188000	0.185	14	15
chr1	228674400	228674800	0.81	99	100			chr1	223976800	223977200	0.6325	102	154			chr3	120277600	120278000	0.2325	15	16
chr1	228674800	228675200	0.7275	139	253			chr1	224033600	224034000	0.6475	84	104			chr3	121312000	121312400	0.285	22	25
chr1	228783200	228783600	0.62	67	87			chr1	224034000	224034400	0.6575	87	99			chr3	122102000	122102400	0.24	16	15
chr1	228871200	228871600	0.6375	74	81			chr1	224035600	224036000	0.7325	67	70			chr3	123361200	123361600	0.24	16	16
chr1	228972400	228972800	0.4725	63	88			chr1	224060800	224061200	0.44	45	57			chr3	124449200	124449600	0.255	16	16
chr1	228973600	228974000	0.74	101	115			chr1	224301600	224302000	0.7	91	113			chr3	124839600	124840000	0.1875	13	16
chr1	228974000	228974400	0.77	94	119			chr1	224348000	224348400	0.7225	97	133			chr3	126108000	126108400	0.26	16	15
chr1	228996800	228997200	0.5225	85	154			chr1	224370800	224371200	0.72	66	64			chr3	127794400	127794800	0.275	17	16
chr1	229070800	229071200	0.3975	64	98			chr1	224517600	224518000	0.66	62	69			chr3	127842400	127842800	0.2775	17	16
chr1	229139200	229139600	0.5725	87	119			chr1	224518000	224518400	0.7975	119	135			chr3	128336400	128336800	0.28	17	17
chr1	229200000	229200400	0.5975	78	102			chr1	224521600	224522000	0.4075	46	62			chr3	128399600	128400000	0.3625	24	21
chr1	229234800	229235200	0.745	129	240			chr1	224544400	224544800	0.66	69	78			chr3	128444800	128445200	0.2975	20	21
chr1	229266000	229266400	0.7375	104	145			chr1	224580400	224580800	0.52	58	68			chr3	128880000	128880400	0.28	18	16
chr1	229267200	229267600	0.6425	95	156			chr1	224622400	224622800	0.72	103	125			chr3	131221600	131222000	0.245	19	22
chr1	229284000	229284400	0.8225	137	207			chr1	224691200	224691600	0.9275	148	198			chr3	132101200	132101600	0.2075	12	15
chr1	229356800	229357200	0.475	84	139			chr1	225117200	225117600	0.7975	105	115			chr3	134082800	134083200	0.2725	16	15
chr1	229357200	229357600	0.85	124	123			chr1	225615600	225616000	0.71	64	64			chr3	134093200	134093600	0.2125	14	15
chr1	229406400	229406800	0.7575	118	194			chr1	225616000	225616400	0.89	98	98			chr3	136471200	136471600	0.495	32	29
chr1	229409600	229410000	0.625	97	132			chr1	225616400	225616800	0.7475	72	72			chr3	136580800	136581200	0.2925	16	15
chr1	229434800	229435200	0.5425	73	101			chr1	225632400	225632800	0.565	81	106			chr3	140660400	140660800	0.3225	23	24
chr1	229478000	229478400	0.5975	72	86			chr1	225632800	225633200	0.62	69	74			chr3	141456800	141457200	0.26	16	16
chr1	229644000	229644400	0.855	160	219			chr1	225654400	225654800	0.2925	52	82			chr3	142166800	142167200	0.3175	20	19
chr1	229645200	229645600	0.4475	56	91			chr1	225662800	225663200	0.39	48	63			chr3	142297600	142298000	0.2425	19	18
chr1	229694400	229694800	0.5775	107	166			chr1	225965200	225965600	0.755	106	117			chr3	142314800	142315200	0.2175	16	16
chr1	229694800	229695200	0.7075	104	156			chr1	225965600	225966000	0.815	86	76			chr3	142720000	142720400	0.26	19	22
chr1	229761600	229762000	0.4525	67	87			chr1	226070000	226070400	0.68	67	71			chr3	147110000	147110400	0.2775	18	16
chr1	229762000	229762400	0.8925	121	117			chr1	226111600	226112000	0.815	102	128			chr3	148709200	148709600	0.2525	17	16
chr1	230202400	230202800	0.5925	78	84			chr1	226116000	226116400	0.925	152	232			chr3	149470000	149470400	0.2575	20	23
chr1	230240400	230240800	0.695	105	127			chr1	226186800	226187200	0.585	56	63			chr3	150264400	150264800	0.26	17	18
chr1	230241600	230242000	0.615	88	163			chr1	226187200	226187600	0.9575	171	190			chr3	155572400	155572800	0.21	15	16
chr1	230289600	230290000	0.3375	42	99			chr1	226189600	226190000	0.5075	53	65			chr3	156272800	156273200	0.27	18	20
chr1	230294400	230294800	0.5025	101	199			chr1	226190400	226190800	0.73	82	101			chr3	156878000	156878400	0.21	16	16
chr1	230562400	230562800	0.375	65	244			chr1	226197200	226197600	0.3875	51	69			chr3	156892800	156893200	0.1775	14	17
chr1	230775600	230776000	0.6225	94	177			chr1	226249600	226250000	0.8175	89	84			chr3	157217200	157217600	0.33	23	21
chr1	230778000	230778400	0.8375	188	283			chr1	226250400	226250800	0.8725	103	105			chr3	158288800	158289200	0.315	19	18
chr1	230778400	230778800	0.545	75	96			chr1	226252000	226252400	0.635	57	65			chr3	158362000	158362400	0.2775	17	20
chr1	230838800	230839200	0.825	147	330			chr1	226298000	226298400	0.67	53	57			chr3	169684400	169684800	0.295	21	21
chr1	230844400	230844800	0.8375	159	266			chr1	226298800	226299200	0.7175	93	116			chr3	171757200	171757600	0.225	15	15
chr1	230850000	230850400	0.9525	199	313			chr1	226309200	226309600	0.635	62	64			chr3	172428800	172429200	0.295	17	16
chr1	230864800	230865200	0.6775	130	251			chr1	226374400	226374800	0.9075	99	105			chr3	176223600	176224000	0.18	12	15
chr1	231114400	231114800	0.645	84	108			chr1	226496400	226496800	0.695	72	74			chr3	177077600	177078000	0.3275	25	27
chr1	231114800	231115200	0.7225	118	158			chr1	226496800	226497200	0.755	71	68			chr3	179322400	179322800	0.3425	20	15
chr1	231298000	231298400	0.6075	94	180			chr1	226595600	226596000	0.785	92	97			chr3	182817200	182817600	0.3325	22	21
chr1	231330800	231331200	0.5825	88	118			chr1	226992400	226992800	0.4575	87	151			chr3	183165200	183165600	0.29	16	15
chr1	231347200	231347600	0.75	94	109			chr1	227127200	227127600	0.7025	63	66			chr3	183602400	183602800	0.25	17	23
chr1	231369600	231370000	0.5775	71	85			chr1	227127600	227128000	0.765	81	85			chr3	183966400	183966800	0.1925	15	21
chr1	231376800	231377200	0.945	164	207			chr1	227128000	227128400	0.73	64	63			chr3	183967200	183967600	0.29	20	19
chr1	231473600	231474000	0.935	118	120			chr1	227422800	227423200	0.4875	57	63			chr3	184032000	184032400	0.225	13	15
chr1	231558000	231558400	0.51	109	193			chr1	227506000	227506400	0.645	65	71			chr3	184279200	184279600	0.255	15	15
chr1	231559600	231560000	0.2475	53	105			chr1	227545200	227545600	0.825	109	124			chr3	184429600	184430000	0.275	17	16
[truncated: 23,930 more rows]

## Sheet: Table S3. DAP clusters 
Columns:
TF	name of the TF
HOT loci	% of HOT loci the TF is present in
HOT enhancers	% of HOT enhancer loci the TF is present in
HOT promoters	% of HOT promoter loci the TF is present in
Cluster	The cluster no described in Figure 2
TF	HOT loci	HOT enhancers	HOT promoters	Cluster			STRING PPI enrichment p-values
ZNF687	65.53	51.75	78.46	Cluster I			Cluster no	PPI enrichment p-value	one-sample t-test over random trials
ARID4B	73.32	73.58	73.09				1	0.001	3.34674e-57
MAX	79.9	82.86	77.12				2	3.33e-16	0.00254483
SAP130	80.77	83.04	78.64				3	9.99e-16	5.9272e-10
KMT2A	38.38	27.08	48.98	Cluster II			4	6.68e-06	1.26846e-13
E2F4	40.85	28.18	52.72
NONO	37.88	18.62	55.93
HNRNPLL	38.01	19.33	55.53
RBM39	40.28	24.92	54.67
POLR2A	42.61	27	57.25
POLR2AphosphoS5	42.59	26.29	57.88
RBFOX2	46.23	27.44	63.85
ARID4A	44.2	26.51	60.78
TAF1	43.57	23.99	61.92
ZFY	52.92	41	64.1
GABPB1	52.49	38.66	65.45
PHF8	53.08	36.27	68.84
POLR2G	51.25	34.54	66.93
NR2C2	46.5	42.73	50.04
DRAP1	47.98	45.6	50.21
YEATS4	47.69	36.36	58.32
HMGXB4	50.13	38.21	61.31
KMT2B	43.08	32.99	52.55
TFDP2	45.28	36.19	53.81
MAZ	45.94	35.68	55.55
SPEN	46.9	37.49	55.71
KDM2A	54.91	44.74	64.45
ASH2L	54.94	47.93	61.5
MNX1	52.49	44.05	60.39
UBTF	52.54	42.92	61.56
GATAD1	51.4	47.14	55.4
ZNF501	50.37	42.58	57.67
DMAP1	49.36	41.4	56.82
THRA	43.3	50.15	36.88
TFE3	43.19	48.94	37.8
PITX1	45.74	52.86	39.07
ATF2	45.16	49.96	40.66
CEBPA	40.96	58.13	24.85	Cluster III
NR2F6	51.44	66.35	37.46
TEAD1	45.7	60.48	31.85
SOX5	46.13	61.5	31.71
NFIL3	49.06	64.3	34.76
HNF4A	48.39	65.28	32.56
FOXA2	48.54	65.71	32.44
PPARG	43.02	54.55	32.21
MIXL1	43.31	54.25	33.06
FOXA1	41.73	55.55	28.77
CEBPG	43.04	56.57	30.34
FOXO1	45.71	55.51	36.53
ZNF217	47.69	60.27	35.89
ZGPAT	68.07	72.19	64.21
MED1	67.07	75.88	58.82
TFAP4	66.7	73.28	60.53
ZFX	61.64	53.98	68.83
EGR1	59.98	55.63	64.06
LIN54	60.92	56.51	65.07
ZNF574	61.25	57.04	65.2
HDAC1	66.66	66.29	67.01
TBX2	60.92	63.89	58.15
THAP11	63.86	65.12	62.67
KAT8	62.81	63.86	61.83
HOXA3	61.88	62.36	61.43
KLF16	55.22	55.44	55.01
PATZ1	57.3	60.82	53.99
ERF	56.16	59.53	53.01
IRF2	51.83	57.14	46.85
SKI	51.19	57.59	45.2
ISL2	52.08	58.74	45.84
TCF7L2	54.39	64.22	45.17
ZNF331	54.27	61.32	47.66
LCORL	55.28	62.47	48.53
ZBTB7B	48.25	51.03	45.64
POGZ	53.7	56.51	51.05
IKZF5	51.28	54.78	48.01
HNF1B	51.2	52.89	49.62
RARA	56	70.85	42.08	Cluster IV
LCOR	54.96	67.1	43.57
FOXP4	54.78	67.98	42.41
BCL6	54.96	67.79	42.93
FOSL2	56.66	67.22	46.76
RXRB	57.45	70.35	45.35
GATAD2A	63.28	79.36	48.21
SOX6	65.98	77.03	55.62
PAXIP1	64	75.89	52.85
ELF3	60.04	67.65	52.91
SMAD4	62.08	73.67	51.21
HDAC2	60.45	71.52	50.07
FOXA3	60.31	72.86	48.53

## Sheet: TableS4. Ultraconserved regions
HOT loci				Ultraconserved regions
chrom	start	end	DAPs	chrom	start	end	Gene ID	Gene name	Distance
HepG2
chr1	27050000	27050400	84	chr1	27050300	27050537	ENSG00000117713	ARID1A	0
chr2	171571200	171572000	188	chr2	171571542	171571838	ENSG00000204335	SP5	19
chr2	171571200	171572000	188	chr2	171571542	171571838	ENSG00000213981	AC007277.3	19659
chr2	171571200	171572000	188	chr2	171571542	171571838	ENSG00000222033	LINC01124	466
chr2	171571200	171572000	188	chr2	171571542	171571838	ENSG00000234350	AC007405.4	7881
chr6	50060800	50061200	84	chr6	50060900	50061222	ENSG00000180872	DEFB112	44537
chr7	115318000	115318400	53	chr7	115318345	115318551	ENSG00000240973	RP11-458K10.2	850
K562
chr1	27024800	27025200	68	chr1	27024656	27024880	ENSG00000117713	ARID1A	0
chr1	27024800	27025200	68	chr1	27024656	27024880	ENSG00000117713	ARID1A	0
chr1	27050000	27050400	71	chr1	27050300	27050537	ENSG00000117713	ARID1A	0
chr1	27050000	27050400	71	chr1	27050300	27050537	ENSG00000117713	ARID1A	0
chr1	164681600	164682000	110	chr1	164681459	164681742	ENSG00000185630	PBX1	0
chr10	22096000	22096400	72	chr10	22096156	22096598	ENSG00000136770	DNAJC1	0
chr12	23875600	23876000	53	chr12	23875704	23875941	ENSG00000134532	SOX5	0
chr13	95314400	95314800	49	chr13	95314312	95314708	-	Mir_562	24974
chr13	95314400	95314800	49	chr13	95314312	95314708	ENSG00000152749	GPR180	27414
chr13	95314400	95314800	49	chr13	95314312	95314708	ENSG00000222129	5S_rRNA	10530
chr13	95314400	95314800	49	chr13	95314710	95314969	ENSG00000125285	SOX21	46910
chr2	171571200	171572000	58,60	chr2	171571542	171571838	ENSG00000204335	SP5	19
chr2	171571200	171572000	58,60	chr2	171571542	171571838	ENSG00000213981	AC007277.3	19659
chr2	171571200	171572000	58,60	chr2	171571542	171571838	ENSG00000222033	LINC01124	466
chr2	171571200	171572000	58,60	chr2	171571542	171571838	ENSG00000234350	AC007405.4	7881
chr2	174939600	174940000	62	chr2	174939554	174939940	ENSG00000138430	OLA1	0
chr7	70034400	70034800	57	chr7	70034557	70034805	ENSG00000158321	AUTS2	0
chr8	106334000	106334400	52	chr8	106333774	106334241	ENSG00000169946	ZFPM2	0
chr8	106341200	106341600	103	chr8	106341230	106341513	ENSG00000169946	ZFPM2	0
H1
chr13	100340000	100340400	14	chr13	100340118	100340335	ENSG00000125246	CLYBL	0
chr13	100340000	100340400	14	chr13	100340118	100340335	ENSG00000263615	MIR4306	44716

## Sheet: Table S5. ENCODE vs. Roadmap
						% of ENCODE HOT loci corresponding to Roadmap HOT
		ENCODE		Roadmap
	cell line	ChIP-seq datasets	HOT loci	ChIP-seq datasets	HOT loci	%
	HepG2	545	25928	77	13081	50.4512
	K562	411	15231	150	9532	62.5829
	H1	47	2732	58	421	15.41

## Sheet: Table S6. RBP datasets
ChIP-seq datasets of RNA-binding proteins
ENCODE file accession	RBP name	cell lines
ENCFF921QZP	ZNF598	HepG2
ENCFF743BHX	ZFP36L2	HepG2
ENCFF748PEB	ZCCHC11	HepG2
ENCFF559BWX	MATR3	HepG2
ENCFF981WJF	ZMAT3	HepG2
ENCFF742ZEJ	FUBP1	HepG2
ENCFF035JQZ	ZC3H4	HepG2
ENCFF013QQG	TOE1	HepG2
ENCFF390SPG	NCOA5	HepG2
ENCFF496AGX	ZNF326	HepG2
ENCFF427GBB	SRSF4	HepG2
ENCFF712IPK	SSRP1	HepG2
ENCFF796LVD	RBM39	HepG2
ENCFF719VLD	PRPF4	HepG2
ENCFF504CCV	CCAR2	HepG2
ENCFF342SIN	SRSF9	HepG2
ENCFF889SKN	TAF15	HepG2
ENCFF867CMD	SAFB2	HepG2
ENCFF660SCE	ZFP36	HepG2
ENCFF449IXP	SYNCRIP	HepG2
ENCFF793YIO	PTBP1	HepG2
ENCFF967UKB	ZNF207	HepG2
ENCFF323QVV	HNRNPUL1	HepG2
ENCFF310GVX	SNRNP70	HepG2
ENCFF761RXC	FIP1L1	HepG2
ENCFF055HMB	HNRNPH1	HepG2
ENCFF163UML	HNRNPL	HepG2
ENCFF944XYP	PHF5A	HepG2
ENCFF457BJI	RBM22	HepG2
ENCFF654RZY	ZNF768	HepG2
ENCFF413CKX	GTF3A	HepG2
ENCFF369UGC	CHD2	HepG2
ENCFF130JQD	AGO1	HepG2
ENCFF847WTF	NONO	HepG2
ENCFF886DRH	HNRNPLL	HepG2
ENCFF348MDS	AGO2	HepG2
ENCFF884TSX	PCBP1	HepG2
ENCFF978CQE	TARDBP	HepG2
ENCFF321UQK	SRSF1	HepG2
ENCFF057MJF	U2AF1	HepG2
ENCFF419PQH	U2AF2	HepG2

## Sheet: Table S7. eCLIP datasets
eCLIP datasets of RNA-binding proteins
ENCODE file accession	RBP name	cell line
ENCFF830FZH	GTF2F1	HepG2
ENCFF588UIR	SMNDC1	HepG2
ENCFF786BCU	FAM120A	HepG2
ENCFF909VPB	LIN28B	HepG2
ENCFF340GPD	ILF3	HepG2
ENCFF714YXE	EFTUD2	HepG2
ENCFF165VFF	RBM15	HepG2
ENCFF951IBI	FUS	HepG2
ENCFF368XBY	UPF1	HepG2
ENCFF841ZPX	DKC1	HepG2
ENCFF998ACW	RBM5	HepG2
ENCFF540HIX	LARP4	HepG2
ENCFF492OPF	XRN2	HepG2
ENCFF960OTE	SFPQ	HepG2
ENCFF232FWK	SF3B4	HepG2
ENCFF103YQS	FUBP3	HepG2
ENCFF684OXK	CDC40	HepG2
ENCFF076GHL	IGF2BP3	HepG2
ENCFF545ZWD	U2AF1	HepG2
ENCFF145YYK	IGF2BP1	HepG2
ENCFF654YLH	SF3A3	HepG2
ENCFF761CYV	SND1	HepG2
ENCFF722RBO	HNRNPA1	HepG2
ENCFF569CXX	HNRNPUL1	HepG2
ENCFF501GXB	NIP7	HepG2
ENCFF882APR	PRPF4	HepG2
ENCFF094VSP	EXOSC5	HepG2
ENCFF988MWD	KHSRP	HepG2
ENCFF146BNV	UTP18	HepG2
ENCFF506YVW	ZNF800	HepG2
ENCFF336IRY	SDAD1	HepG2
ENCFF467UOO	TIAL1	HepG2
ENCFF762QRZ	FTO	HepG2
ENCFF097KHT	SSB	HepG2
ENCFF702QGF	FXR2	HepG2
ENCFF754XAQ	HNRNPK	HepG2
ENCFF013SWN	DDX52	HepG2
ENCFF992ALD	STAU2	HepG2
ENCFF890DJI	PABPN1	HepG2
ENCFF056OAB	SAFB	HepG2
ENCFF502OYV	PCBP1	HepG2
ENCFF205KCK	G3BP1	HepG2
ENCFF936QEL	BCLAF1	HepG2
ENCFF073PST	AQR	HepG2
ENCFF991OSY	HLTF	HepG2
ENCFF311PHS	YBX3	HepG2
ENCFF401RUI	TROVE2	HepG2
ENCFF251QTX	RPS3	HepG2
ENCFF967UUI	DROSHA	HepG2
ENCFF739ERP	AKAP1	HepG2
ENCFF966QXZ	WDR43	HepG2
ENCFF790BKB	SUB1	HepG2
ENCFF814MSM	FKBP4	HepG2
ENCFF556DEY	EIF3H	HepG2
ENCFF951OAJ	DGCR8	HepG2
ENCFF100OEX	PTBP1	HepG2
ENCFF175VJO	HNRNPM	HepG2
ENCFF452KYY	DDX55	HepG2
ENCFF361GRY	ZC3H11A	HepG2
ENCFF355UYF	NCBP2	HepG2
ENCFF082QGS	RBFOX2	HepG2
ENCFF065ZXM	PPIG	HepG2
ENCFF978MRH	DDX6	HepG2
ENCFF432ASF	SRSF9	HepG2
ENCFF736HGJ	TBRG4	HepG2
ENCFF190UCK	DHX30	HepG2
ENCFF073PCD	HNRNPL	HepG2
ENCFF432EVC	NKRF	HepG2
ENCFF356JSO	XRCC6	HepG2
ENCFF399DJZ	BUD13	HepG2
ENCFF253ZSN	RBM22	HepG2
ENCFF534YQS	HNRNPC	HepG2
ENCFF957GRM	SLTM	HepG2
ENCFF673EQX	AGGF1	HepG2
ENCFF935UME	SUGP2	HepG2
ENCFF635SWD	DDX3X	HepG2
ENCFF991VJI	DDX59	HepG2
ENCFF825AVT	LSM11	HepG2
ENCFF079ZKD	POLR2G	HepG2
ENCFF944XFZ	SRSF7	HepG2
ENCFF506LVL	NOL12	HepG2
ENCFF774NGW	LARP7	HepG2
ENCFF296TYQ	BCCIP	HepG2
ENCFF022FGD	UCHL5	HepG2
ENCFF645IXY	CSTF2	HepG2
ENCFF219KHR	GRSF1	HepG2
ENCFF454MWQ	PCBP2	HepG2
ENCFF067JAD	U2AF2	HepG2
ENCFF886MOW	GRWD1	HepG2
ENCFF171PTV	MATR3	HepG2
ENCFF579FWN	SUPV3L1	HepG2
ENCFF815XNW	QKI	HepG2
ENCFF105GZJ	TRA2A	HepG2
ENCFF019IEW	CSTF2T	HepG2
ENCFF899ZEH	TAF15	HepG2
ENCFF382XRS	HNRNPU	HepG2
ENCFF378HWC	TIA1	HepG2
ENCFF098XUM	PRPF8	HepG2
ENCFF957KNE	XPO5	HepG2
ENCFF214HOA	SRSF1	HepG2
ENCFF645PLG	NOLC1	HepG2
ENCFF177RJW	FASTKD2	HepG2
ENCFF286YIR	EIF3D	HepG2
